# Supplementary material
Source: PubMed Central journal article supplement (PMC3084124)
Supplement: 1015267108_Appendix.pdf [file 1015267108_Appendix.pdf]

## Supporting Information

### Diversity-Oriented Synthesis of Macrocyclic Peptidomimetics

Albert Isidro-Llobet<sup>a</sup>, Tiffanie Murillo<sup>a</sup>, Paula Bello<sup>a</sup>, Agostino Cilibrizzi<sup>a</sup>, James T. Hodgkinson<sup>a</sup>, Warren R. J. D. Galloway<sup>a</sup>, Andreas Bender<sup>b</sup>, Martin Welch<sup>c</sup>, David R. Spring<sup>a,1</sup>

<sup>a</sup>Department of Chemistry, University of Cambridge, Lensfield Road, Cambridge, CB2 1EW, United Kingdom; <sup>b</sup>Unilever Centre for Molecular Sciences Informatics, Department of Chemistry, University of Cambridge, Lensfield Road, Cambridge, CB2 1EW, United Kingdom <sup>c</sup>Department of Biochemistry, University of Cambridge, Tennis Court Road, Cambridge CB2 1QW, United Kingdom.

<sup>1</sup>To whom correspondence may be addressed: Department of Chemistry, University of Cambridge, Lensfield Road, Cambridge, CB2 1EW (UK), Fax: (+44) 1223-336362. E-mail: spring@ch.cam.ac.uk. Homepage: www-spring.ch.cam.ac.uk

#### General Remarks.

Unless otherwise mentioned, all reagents were purchased from commercial sources. Room temperature (r.t.) refers to ambient temperature. Temperatures of 0 °C were maintained using an ice–water bath. Yields refer to chromatographically and spectroscopically pure compounds unless otherwise stated. Where possible, reactions were monitored by thin layer chromatography (TLC) performed on commercially prepared glass plates precoated with Merck silica gel 60 F254 or aluminium oxide 60 F254. Visualisation was by the quenching of UV fluorescence ( $\lambda_{\text{max}} = 254 \text{ nm}$ ) or by staining with potassium permanganate. All flash chromatography was carried out using slurry-packed Merck 9325 Keisegel 60 silica gel unless otherwise stated. Infrared spectra were recorded neat (unless otherwise stated) on a Perkin–Elmer Spectrum One spectrometer with internal referencing. Selected absorption maxima ( $\lambda_{\text{max}}$ ) are reported in wavenumbers ( $\text{cm}^{-1}$ ). Melting points

were obtained using a Büchi Melting Point B-545 instrument and are uncorrected. Microwave heating was performed in a C.E.M. Discover S-Class apparatus.  $^1\text{H}$  NMR were recorded using an internal deuterium lock at ambient probe temperatures on the following instruments: Bruker DPX-400 (400 MHz), Bruker Avance 400 QNP (400 MHz) and Bruker Avance 500 BB ATM (500 MHz). Chemical shifts ( $\delta$ ) are quoted in ppm, to the nearest 0.01 ppm, and are referenced to the residual non-deuterated solvent peak. Coupling constants ( $J$ ) are reported in Hertz (Hz) to the nearest 0.5 Hz. Data are reported as follows: chemical shift, multiplicity (br = broad; s = singlet; d = doublet; t = triplet; m = multiplet), integration and assignment and coupling constant(s). Proton assignments were determined either on the basis of unambiguous chemical shift or coupling pattern, by patterns observed in 2D experiments ( $^1\text{H}$ - $^1\text{H}$  COSY, HSQC) or by analogy to fully interpreted spectra for related compounds.  $^{13}\text{C}$  NMR were recorded by broadband proton-spin-decoupling at ambient probe temperatures using an internal deuterium lock on the following instruments: Bruker DPX-400 (100 MHz), Bruker Avance 400 QNP (100 MHz) and Bruker Avance 500 BB ATM (125 MHz). Chemical shifts ( $\delta$ ) are quoted in ppm, to the nearest 0.1 ppm, and are referenced to the residual non-deuterated solvent peak. Assignments were supported by DEPT and 2D experiments (HSQC) or by analogy to fully interpreted spectra for related compounds. Any numbering in selected spectral data does not follow the IUPAC naming system and is used for the assignment of the  $^1\text{H}$  NMR and  $^{13}\text{C}$  NMR spectra. The general numbering used for the compounds is shown in Fig. S1, S2 and S3. High Resolution Masses were measured using a Spectrometer or a Micromass Quadrupole-Time of Flight (Q-ToF) spectrometer. Mass values are reported within the error limits of  $\pm 5$  ppm mass units. The ionisation technique used was electrospray ionisation (ESI). Optical rotations were recorded on a Perkin-Elmer 343 polarimeter.  $[\alpha]_D^{25}$  values are reported in  $10^{-1}$  deg  $\text{cm}^2 \text{g}^{-1}$  at 589 nm, concentration ( $c$ ) is given in  $\text{g}(100\text{mL})^{-1}$ . Full spectral data for all novel compounds are given below, all previously characterized compounds gave spectra consistent with the literature. Other abbreviations used: microwave heating (MW), aromatic (arom.).

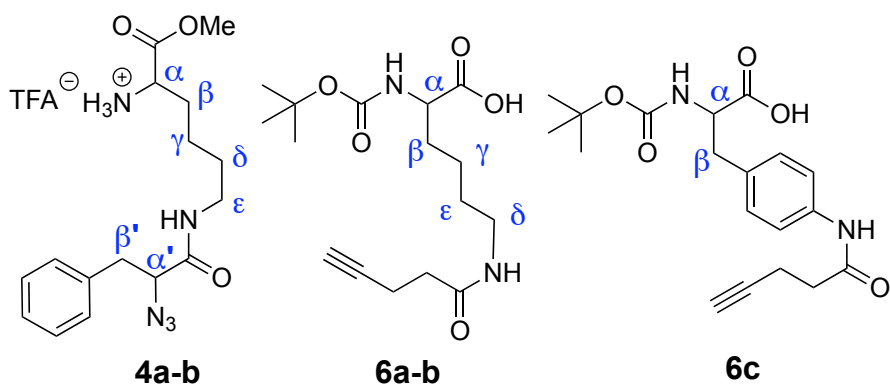

**Fig. S1.** Nomenclature for  $^1\text{H}$  NMR assignment of the building blocks.

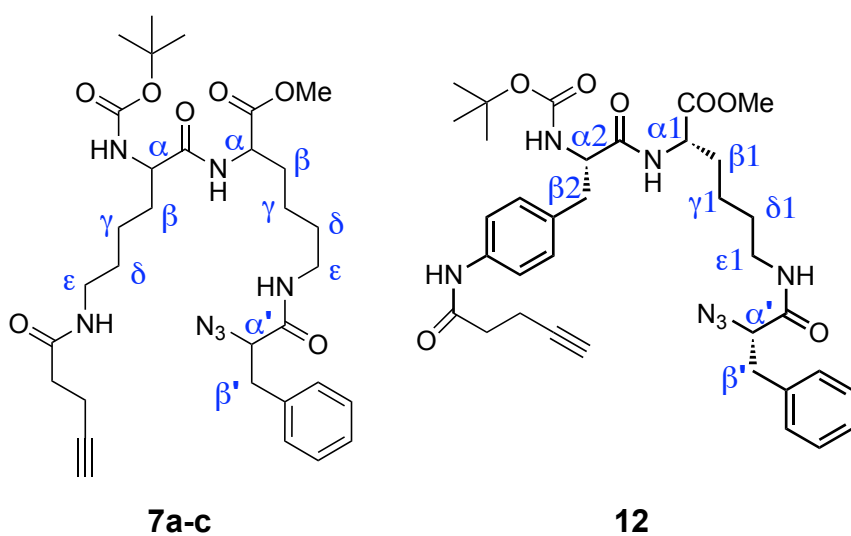

**Fig. S2.** Nomenclature for  $^1\text{H}$  NMR assignment of the linear peptidomimetics.

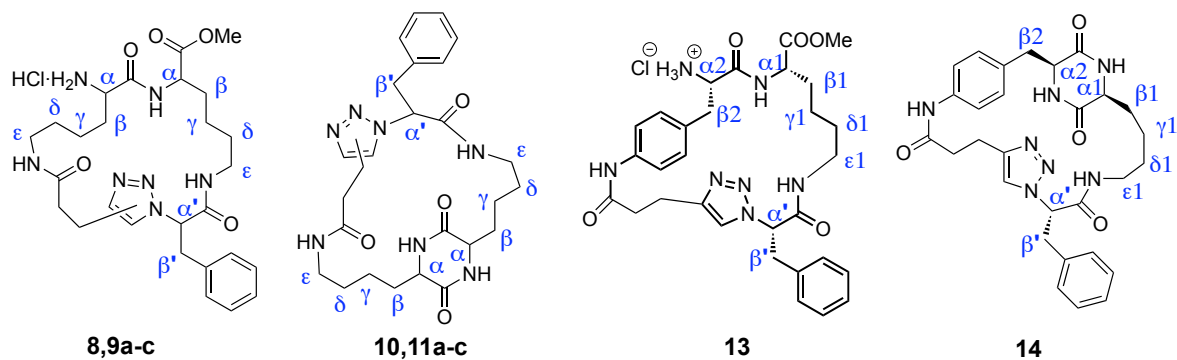

**Fig. S3.** Nomenclature for  $^1\text{H}$  NMR assignment of the macrocyclic peptidomimetics.

## Synthesis of the building blocks.

**(S)-2-azido-3-phenylpropanoic acid 1a, (R)-2-azido-3-phenylpropanoic acid 1b, Boc-L-Lys(Z)-OMe & 4-pentynoic acid succinimidyl ester 5** were prepared by literature procedures (1-3).

**H-L- Lys(L-N<sub>3</sub>-Phe)-OMe·TFA 4a.** Boc-L-Lys(Z)-OMe (3.90 g, 9.91 mmol) was dissolved in MeOH (40 mL) and hydrogenated overnight over 10% palladium charcoal (200 mg) at room temperature and pressure. The mixture was filtered through a pad of Celite and the solvent was removed under reduced pressure. The slurry was co-evaporated with Et<sub>2</sub>O (3x) and petrol ether 40:60 (3x) to yield 2.32 g of Boc-L-Lys-OMe (2.32 g) as an oil which was used without further purification. Boc-L-Lys-OMe (2.05 g, 8.3 mmol) was dissolved in dry CH<sub>2</sub>Cl<sub>2</sub> (25 mL). Triethylamine (2.3 mL, 16.6 mmol), EDC.HCl (1.60 g, 8.3 mmol) and HOBt (1.28 g, 8.3 mmol) were added sequentially. After total dissolution, (S)-2-azido-3-phenylpropanoic **1a** (1.59 g, 8.3 mmol) in dry CH<sub>2</sub>Cl<sub>2</sub> (25 mL) was added to the solution of **3** and the mixture was stirred overnight at room temperature. Subsequently, the CH<sub>2</sub>Cl<sub>2</sub> was removed under reduced pressure and EtOAc (50 mL) was added to the slurry. The organic layer was washed with H<sub>2</sub>O (2 x 40 mL) and saturated aqueous NaHCO<sub>3</sub> (2 x 40 mL). Extra EtOAc (50 mL) was added to the organic phase and it was washed with 5% citric acid (2 x 40 mL) and H<sub>2</sub>O (2 x 40 mL). The organic layer was then dried (MgSO<sub>4</sub>), evaporated to dryness under reduced pressure performing co-evaporations with CH<sub>2</sub>Cl<sub>2</sub> (3x) giving 2.84 g of Boc-L-Lys-(N<sub>3</sub>-L-Phe)-OMe. The Boc group of the latter was removed upon treatment with TFA (16 mL) in CH<sub>2</sub>Cl<sub>2</sub> (16 mL) for 2h at rt. The organic solvent was removed under reduced pressure, the slurry was then co-evaporated with CH<sub>2</sub>Cl<sub>2</sub> (3x), Et<sub>2</sub>O (3x) and dried at high vacuum to remove all traces of TFA. H-L- Lys(L-N<sub>3</sub>-Phe)-OMe·TFA was obtained as a brown oil (2.86 g, 73% yield over 3 steps).  $[\alpha]_D^{25} = +39.0$  (c 0.5, MeOH). IR:  $\nu_{max}$  (neat)/cm<sup>-1</sup> 2956, 2117, 1751, 1668; <sup>1</sup>H NMR (500 MHz, DMSO-*d*<sub>6</sub>)  $\delta$  8.37 (br, 3H, NH<sub>3</sub><sup>+</sup>), 8.20 (t, 1H,  $\epsilon$ -NH,  $J = 5.5$  Hz), 7.33-7.23 (m, 5H, CH arom.), 4.05-3.97 (m, 1H,  $\alpha$ -CH), 3.94 (dd, 1H,  $\alpha'$ -CH,  $J = 8.5$  Hz,  $J' = 6.0$  Hz), 3.76 (s, 3H, CH<sub>3</sub>), 3.10-3.02 (m, 3H, 1H  $\beta'$ -CH<sub>2</sub>,  $\epsilon$ -CH<sub>2</sub>), 2.93 (dd, 1H,  $\beta'$ -CH<sub>2</sub>,  $J =$

14.0 Hz,  $J' = 8.5$  Hz), 1.80-1.68 (m, 2H,  $\beta$ -CH<sub>2</sub>), 1.42-1.16 (m, 4H,  $\gamma$ -CH<sub>2</sub>,  $\delta$ -CH<sub>2</sub>). <sup>13</sup>C NMR (125 MHz, DMSO-*d*<sub>6</sub>)  $\delta$  169.9 (C), 168.6 (C), 136.7 (C), 129.0 (CH), 128.3 (CH), 126.6 (CH), 62.5 (CH), 52.7 (CH<sub>3</sub>), 51.7 (CH), 38.1 (CH<sub>2</sub>), 36.9 (CH<sub>2</sub>), 29.6 (CH<sub>2</sub>), 28.2 (CH<sub>2</sub>), 21.5 (CH<sub>2</sub>). HRMS (ESI):  $m/z$  calcd. for C<sub>16</sub>H<sub>24</sub>N<sub>5</sub>O<sub>3</sub> [M + H<sup>+</sup>] 334.1879, found 334.1867.

**H-Lys-(N<sub>3</sub>-D-Phe)-OMe·TFA 4b.** A procedure analogous to the one used for the synthesis of **4a** but using (*R*)-2-azido-3-phenylpropanoic **1b** as starting material yielded H-Lys-(N<sub>3</sub>-D-Phe)-OMe·TFA as a brown oil (1.4 g, 65% yield over 3 steps).  $[\alpha]_{D}^{25} = -19.8$  (c 0.5, MeOH). IR:  $\nu_{max}$  (neat)/cm<sup>-1</sup> 2950, 2111, 1751, 1670; <sup>1</sup>H NMR (500 MHz, DMSO-*d*<sub>6</sub>)  $\delta$  8.36 (br, 3H, NH<sub>3</sub><sup>+</sup>), 8.19 (t, 1H,  $\epsilon$ -NH,  $J = 5.5$  Hz), 7.34-7.24 (m, 5H, CH arom.), 4.05-3.97 (m, 1H,  $\alpha$ -CH), 3.94 (dd, 1H,  $\alpha'$ -CH,  $J = 8.5$  Hz,  $J' = 6.0$  Hz), 3.76 (s, 3H, CH<sub>3</sub>), 3.10-3.02 (m, 3H, 1H  $\beta'$ -CH<sub>2</sub>,  $\epsilon$ -CH<sub>2</sub>), 2.93 (dd, 1H,  $\beta'$ -CH<sub>2</sub>,  $J = 13.5$  Hz,  $J' = 8.5$  Hz), 1.80-1.68 (m, 2H,  $\beta$ -CH<sub>2</sub>), 1.42-1.16 (m, 4H,  $\gamma$ -CH<sub>2</sub>,  $\delta$ -CH<sub>2</sub>). <sup>13</sup>C NMR (125 MHz, DMSO-*d*<sub>6</sub>)  $\delta$  169.9 (C), 168.6 (C), 136.7 (C), 129.0 (CH), 128.3 (CH), 126.6 (CH), 62.5 (CH), 52.7 (CH<sub>3</sub>), 51.7 (CH), 39.4 (CH<sub>2</sub>), 38.1 (CH<sub>2</sub>), 36.9 (CH<sub>2</sub>), 29.6 (CH<sub>2</sub>), 28.2 (CH<sub>2</sub>), 21.4 (CH<sub>2</sub>). HRMS (ESI):  $m/z$  calcd. for C<sub>16</sub>H<sub>24</sub>N<sub>5</sub>O<sub>3</sub> [M + H]<sup>+</sup> 334.1879, found 334.1883.

**Boc-*L*-Lys(*N*-4-Pentynoyl)-OH 6a.** To a suspension of Boc-*L*-Lys-OH (4.2 g, 17.05 mmol), in dry DMF (75 mL), was added a first fraction of DIPEA (3.1 mL, 18.76 mmol). A solution of **5** (4.0 g, 20.46 mmol) in dry DMF (30 mL) was then added dropwise over 10 minutes. At the minute 5, a second fraction of DIPEA (3.1 mL, 18.76 mmol) was added and the mixture was stirred at room temperature for 4 hours. The organic solvent was removed under reduced pressure and the slurry was diluted with H<sub>2</sub>O (100 mL). The pH was adjusted to 8-9 by addition of saturated Na<sub>2</sub>CO<sub>3</sub> and washings with Et<sub>2</sub>O (3 x 60 mL) were performed. The aqueous layer was then acidified to pH 2-3 with conc. HCl and extracted with EtOAc (3 x 75 mL). The organic extracts were dried (MgSO<sub>4</sub>) and evaporated to dryness under reduced pressure. After precipitations in Et<sub>2</sub>O, Boc-*L*-Lys(*N*-4-Pentynoyl)-OH was obtained as a white solid in 86% yield (contaminated with 5% by mass of *N*-Hydroxysuccinimide, <sup>1</sup>H NMR).  $[\alpha]_{D}^{25} = +4.8$  (c 0.5, CHCl<sub>3</sub>). mp = 92.0-94.0°C. IR:  $\nu_{max}$  (neat)/cm<sup>-1</sup> 3284, 2936, 1738, 1683, 1619, 1545; <sup>1</sup>H NMR (400 MHz, CDCl<sub>3</sub>):  $\delta$  5.99 (br, 1H, NH

carbamate), 5.26 (d, 1H,  $\epsilon$ -NH,  $J$ = 7.0 Hz), 4.33-4.23 (m, 1H,  $\alpha$ -CH), 3.33-3.23 (m, 2H,  $\epsilon$ -CH<sub>2</sub>), 2.54 (td, 2H,  $\underline{\text{CH}_2\text{CH}_2\text{CO}}$ ,  $J$ = 6.5 Hz,  $J'$ = 2.5 Hz), 2.41 (t, 2H,  $\text{CH}_2\underline{\text{CH}_2\text{CO}}$ ,  $J$ = 6.5 Hz), 2.04 (t, 1H, CH alkyne,  $J$ = 2.5 Hz), 1.93-1.79 (m, 1H,  $\beta$ -CH<sub>2</sub>), 1.79-1.67 (m, 1H,  $\beta$ -CH<sub>2</sub>), 1.62-1.48 (m, 2H,  $\delta$ -CH<sub>2</sub>), 1.45 (s, 9H, CH<sub>3</sub> <sup>t</sup>Bu), 1.48-1.35 (m, 2H,  $\gamma$ -CH<sub>2</sub>). <sup>13</sup>C NMR (100 MHz, CDCl<sub>3</sub>): 175.3 (C), 172.1 (C), 155.8 (C), 82.8 (CH), 80.1 (C), 69.6 (CH), 53.1 (CH), 39.2 (CH<sub>2</sub>), 35.2 (CH<sub>2</sub>), 31.9 (CH<sub>2</sub>), 28.7 (CH<sub>2</sub>), 28.3(CH<sub>3</sub>), 22.3 (CH<sub>2</sub>), 14.9 (CH<sub>2</sub>). HRMS (ESI):  $m/z$  calcd. for C<sub>16</sub>H<sub>26</sub>N<sub>2</sub>O<sub>5</sub>Na [M + Na]<sup>+</sup> 349.1739, found 349.1773.

**Boc-*D*-Lys(*N*-4-Pentynoyl)-OH 6b.** A procedure analogous to the one used for the synthesis of **6a** but using Boc-*D*-Lys-OH as starting material yielded Boc-*D*-Lys(*N*-4-Pentynoyl)-OH (474 mg, 73%) as a white solid.  $[\alpha]_{\text{D}}^{25}$ = -4.9 (c 0.39, CHCl<sub>3</sub>), mp= 92.5-95.0°C. IR, <sup>1</sup>H NMR (400 MHz, CDCl<sub>3</sub>), <sup>13</sup>C NMR (100 MHz, CDCl<sub>3</sub>) and HRMS data were identical to those of Boc-*L*-Lys(*N*-4-Pentynoyl)-OH. HRMS (ESI):  $m/z$  calcd. for C<sub>16</sub>H<sub>26</sub>N<sub>2</sub>O<sub>5</sub>Na [M + Na]<sup>+</sup> 349.1739, found 349.1739.

**Boc-*L*-4-amino-phenylalanine(*N*-4-pentynoyl)-OH 6c.** A procedure analogous to the one used for the synthesis of **6a** but using Boc-*L*-4-amino-phenylalanine-OH as starting material and extending the reaction time to 15h yielded Boc-*L*-4-amino-phenylalanine(*N*-4-pentynoyl)-OH as a white solid (750 mg, 58% yield) and an estimated purity of 90% (<sup>1</sup>H NMR).  $[\alpha]_{\text{D}}^{25}$ = +14.7 (c 0.70, CHCl<sub>3</sub>). mp= 86-89°C. IR:  $\nu_{\text{max}}$  (neat)/cm<sup>-1</sup> 3288, 2974, 2935, 1668, 1603, 1540, 1515, 1159; <sup>1</sup>H NMR (500 MHz, DMSO):  $\delta$ = 9.90 (s, 1H, NH aniline), 7.48 (d, 2H, CH aniline,  $J$ = 8.5 Hz), 7.15 (d, 2H, CH aniline,  $J$ = 8.5 Hz), 7.06 (d, 1H,  $\alpha$ -NH,  $J$ = 8.5 Hz), 4.04 (m, 1H,  $\alpha$ -CH), 2.96-2.92 (m, 1H,  $\beta$ -CH<sub>2</sub>), 2.79 (t, 1H, CH alkyne,  $J$ = 2.5 Hz), 2.78-2.74 (m, 1H,  $\beta$ -CH<sub>2</sub>), 2.52-2.43 (m, 4H, CH<sub>2</sub>CH<sub>2</sub>CO), 1.32 (s, 9H, CH<sub>3</sub> <sup>t</sup>Bu). <sup>13</sup>C NMR (125 MHz, DMSO):  $\delta$ = 173.5 (C), 169.0 (C), 155.3 (C), 137.3 (C), 132.5 (C), 129.1 (CH), 118.7 (CH), 83.5 (CH), 77.9 (C), 71.3 (CH), 55.1 (CH), 35.7 (CH<sub>2</sub>), 35.0 (CH<sub>2</sub>), 28.0 (CH<sub>3</sub>), 14.0 (CH<sub>2</sub>). HRMS (ESI):  $m/z$  calcd. for C<sub>19</sub>H<sub>24</sub>N<sub>2</sub>O<sub>5</sub>Na [M + Na]<sup>+</sup> 383.1583, found 383.1596.

## Linear peptidomimetics synthesis.

**Linear peptidomimetic 7a (1S,2S,3S).** Compound **4a** (1.41 g, 3.25 mmol) was dissolved in dry CH<sub>2</sub>Cl<sub>2</sub> (30 mL). Triethylamine (1.13 mL, 8.13 mmol) was added followed by EDC·HCl (748 mg, 3.90 mmol) and HOBt (550 mg, 3.90 mmol). When all products were dissolved, free carboxylic acid **6a** (1.27 g, 3.90 mmol) in dry CH<sub>2</sub>Cl<sub>2</sub> (7 mL) was added and the mixture was stirred overnight at room temperature. Most of the organic solvent was removed under reduced pressure without heating. EtOAc (100 mL) was added to the slurry and the resulting suspension was washed with H<sub>2</sub>O, saturated aqueous NaHCO<sub>3</sub> (2 x 60 mL each). Extra EtOAc (30 mL) was added and washings with 5% citric acid and H<sub>2</sub>O (2 x 60 mL each) were performed. The organic phase was dried (MgSO<sub>4</sub>) and evaporated to dryness under reduced pressure. After purification by flash chromatography on silica gel (1% MeOH in EtOAc), compound **7a** was obtained as a white solid (735 mg, 37% yield).  $[\alpha]_{D}^{25} = +10.9$  (c 0.53, CHCl<sub>3</sub>). mp= 86-89°C. IR:  $\nu_{max}$  (neat)/cm<sup>-1</sup> 3301, 2935, 2106, 1724, 1640, 1542, 1522; <sup>1</sup>H NMR (400 MHz, CDCl<sub>3</sub>):  $\delta =$  7.33-7.24 (m, 5H, CH arom.), 6.83 (d, 1H,  $\alpha$ -NH,  $J = 7.5$  Hz), 6.48 (t, 1H,  $\epsilon$ -NH,  $J = 5.5$  Hz), 6.03 (t, 1H,  $\epsilon$ -NH,  $J = 5.0$  Hz), 5.32 (d, 1H,  $\alpha$ -NH,  $J = 6.5$  Hz), 4.51 (td, 1H,  $\alpha$ -CH,  $J = 8.0$  Hz,  $J' = 5.0$  Hz), 4.15 (dd, 1H,  $\alpha'$ -CH,  $J = 8.0$  Hz,  $J' = 5.0$  Hz), 4.17-4.10 (m, 1H,  $\alpha$ -CH), 3.74 (s, 3H, CH<sub>3</sub>O), 3.33-3.25 (m, 3H,  $\epsilon$ -CH<sub>2</sub>, 1H  $\beta'$ -CH<sub>2</sub>), 3.24-3.12 (m, 1H,  $\epsilon$ -CH<sub>2</sub>), 3.03 (dd, 1H,  $\beta'$ -CH<sub>2</sub>,  $J = 14.0$  Hz,  $J' = 8.0$  Hz), 2.52 (td, 2H,  $\gamma$ -CH<sub>2</sub>CH<sub>2</sub>CO,  $J = 7.0$  Hz,  $J' = 2.5$  Hz), 2.39 (t, 2H,  $\delta$ -CH<sub>2</sub>CH<sub>2</sub>CO,  $J = 7.0$  Hz), 2.02 (t, 1H, CH alkyne,  $J = 2.5$  Hz), 1.92-1.79 (m, 2H, 1H  $\beta$ -CH<sub>2</sub>, 1H  $\beta$ -CH<sub>2</sub>), 1.69-1.62 (m, 2H, 1H  $\beta$ -CH<sub>2</sub>, 1H  $\beta$ -CH<sub>2</sub>), 1.59-1.50 (m, 2H,  $\delta$ -CH<sub>2</sub>), 1.48-1.37 (m, 4H,  $\gamma$ -CH<sub>2</sub>,  $\delta$ -CH<sub>2</sub>), 1.43 (s, 9H, CH<sub>3</sub> 'Bu), 1.32-1.24 (m, 2H,  $\gamma$ -CH<sub>2</sub>). <sup>13</sup>C NMR (100 MHz, CDCl<sub>3</sub>):  $\delta =$  172.6 (C), 172.2 (C), 171.2 (C), 168.9 (C), 155.8 (C), 136.2 (C), 129.4 (CH), 128.6 (CH), 127.2 (CH), 83.1 (CH), 80.1 (C), 69.3 (C), 65.3 (CH), 54.2 (CH), 52.4 (CH<sub>3</sub>), 51.8 (CH), 38.8 (CH<sub>2</sub>), 38.7 (CH<sub>2</sub>), 38.4 (CH<sub>2</sub>), 35.3 (CH<sub>2</sub>), 31.7 (CH<sub>2</sub>), 31.5 (CH<sub>2</sub>), 28.9 (CH<sub>2</sub>), 28.6 (CH<sub>2</sub>), 28.3 (CH<sub>3</sub>), 22.3 (CH<sub>2</sub>), 22.3 (CH<sub>2</sub>), 14.9 (CH<sub>2</sub>). HRMS (ESI):  $m/z$  calcd. for C<sub>32</sub>H<sub>48</sub>N<sub>7</sub>O<sub>7</sub> [M + H]<sup>+</sup> 642.3615, found 642.3597.

**Linear peptidomimetic 7b (1S,2R,3S).** A procedure analogous to the one used for the synthesis of **7a** but using **4a** and **6b** as starting materials yielded **7b** as a white solid (564 mg, 39% yield).  $[\alpha]_{\text{D}}^{25} = +32.2$  (c 0.50,  $\text{CHCl}_3$ ). mp= 91-92°C. IR:  $\nu_{\text{max}}$  (neat)/ $\text{cm}^{-1}$  3315, 2934, 2107, 1738, 1642, 1524;  $^1\text{H}$  NMR (400 MHz,  $\text{CDCl}_3$ ):  $\delta = 7.33$ -7.24 (m, 5H, CH arom.), 6.77 (d, 1H,  $\alpha$ -NH,  $J = 7.5$  Hz), 6.51 (t, 1H,  $\epsilon$ -NH,  $J = 5.0$  Hz), 5.97 (t, 1H,  $\epsilon$ -NH,  $J = 5.5$  Hz), 5.28 (br, 1H,  $\alpha$ -NH), 4.54 (td, 1H,  $\alpha$ -CH,  $J = 8.0$  Hz,  $J' = 4.8$  Hz), 4.14 (dd, 1H,  $\alpha'$ -CH,  $J = 8.0$  Hz,  $J' = 4.5$  Hz), 4.12-4.04 (m, 1H,  $\alpha$ -CH), 3.73 (s, 3H,  $\text{CH}_3\text{O}$ ), 3.33-3.20 (m, 4H, 3H  $\epsilon$ - $\text{CH}_2$ , 1H  $\beta'$ - $\text{CH}_2$ ), 3.18-3.10 (m, 1H,  $\epsilon$ - $\text{CH}_2$ ), 3.01 (dd, 1H,  $\beta'$ - $\text{CH}_2$ ,  $J = 14.0$  Hz,  $J' = 8.0$  Hz), 2.52 (td, 2H,  $\underline{\text{CH}_2\text{CH}_2\text{CO}}$ ,  $J = 7.0$  Hz,  $J' = 2.5$  Hz), 2.38 (t, 2H,  $\text{CH}_2\underline{\text{CH}_2\text{CO}}$ ,  $J = 7.0$  Hz), 2.03 (t, 1H, CH alkyne,  $J = 2.5$  Hz), 1.90-1.80 (m, 2H, 1H  $\beta$ - $\text{CH}_2$ , 1H  $\beta$ - $\text{CH}_2$ ), 1.70-1.60 (m, 2H, 1H  $\beta$ - $\text{CH}_2$ , 1H  $\beta$ - $\text{CH}_2$ ), 1.56-1.47 (m, 2H,  $\delta$ - $\text{CH}_2$ ), 1.47-1.35 (m, 4H,  $\delta$ - $\text{CH}_2$ ,  $\gamma$ - $\text{CH}_2$ ), 1.44 (s, 9H,  $\text{CH}_3$   $t$ Bu), 1.32-1.22 (m, 2H,  $\gamma$ - $\text{CH}_2$ ).  $^{13}\text{C}$  NMR (100 MHz,  $\text{CDCl}_3$ ):  $\delta = 172.5$  (C), 172.0 (C), 171.3 (C), 168.8 (C), 155.8 (C), 136.3 (C), 129.4 (CH), 128.6 (CH), 127.1 (CH), 83.0 (CH), 80.2 (C), 69.4 (C) 65.3 (CH), 54.5 (CH), 52.4 ( $\text{CH}_3$ ), 51.7 (CH), 39.0 ( $\text{CH}_2$ ), 38.6 ( $\text{CH}_2$ ), 38.5 ( $\text{CH}_2$ ), 35.4 ( $\text{CH}_2$ ), 31.7 ( $\text{CH}_2$ ), 31.3 ( $\text{CH}_2$ ), 29.1 ( $\text{CH}_2$ ), 28.6 ( $\text{CH}_2$ ), 28.3 ( $\text{CH}_3$ ), 22.3 ( $\text{CH}_2$ ), 22.2 ( $\text{CH}_2$ ), 14.9 ( $\text{CH}_2$ ). HRMS (ESI):  $m/z$  calcd. for  $\text{C}_{32}\text{H}_{48}\text{N}_7\text{O}_7$   $[\text{M} + \text{H}]^+$  642.3615, found 642.3625.

**Linear peptidomimetic 7c (1S,2S,3R).** A procedure analogous to the one used for the synthesis of **7a** but using **4b** and **6a** as starting materials yielded **7c** as a white solid (659 mg, 43% yield).  $[\alpha]_{\text{D}}^{25} = -34.9$  (c 0.68,  $\text{CHCl}_3$ ). mp= 69-71°C. IR:  $\nu_{\text{max}}$  (neat)/ $\text{cm}^{-1}$  3312, 2943, 2103, 1738, 1646, 1522;  $^1\text{H}$  NMR (400 MHz,  $\text{CDCl}_3$ ):  $\delta = 7.33$ -7.26 (m, 5H, CH arom.), 6.87 (d, 1H,  $\alpha$ -NH,  $J = 6.0$  Hz), 6.48 (br, 1H,  $\epsilon$ -NH,  $J = 5.0$  Hz), 6.05 (br, 1H,  $\epsilon$ -NH), 5.26 (d, 1H,  $\alpha$ -NH,  $J = 7.0$  Hz), 4.51-4.41 (m,  $\alpha$ -CH, 1H), 4.34-4.28 (m, 1H,  $\alpha'$ -CH), 4.12 (d, 1H,  $\alpha$ -CH,  $J = 6.0$  Hz), 3.74 (s, 3H,  $\text{CH}_3\text{O}$ ), 3.34 (dd, 1H,  $\beta'$ - $\text{CH}_2$ ,  $J = 14.0$  Hz,  $J' = 4.5$  Hz), 3.30-3.25 (m, 3H,  $\epsilon$ - $\text{CH}_2$  Lys), 3.16-3.06 (m, 1H,  $\epsilon$ - $\text{CH}_2$  Lys), 3.02 (dd, 1H,  $\beta'$ - $\text{CH}_2$ ,  $J = 14.0$  Hz,  $J' = 8.0$  Hz), 2.50 (td, 2H,  $\underline{\text{CH}_2\text{CH}_2\text{CO}}$ ,  $J = 7.0$  Hz,  $J' = 2.5$  Hz), 2.38 (t, 2H,  $\text{CH}_2\underline{\text{CH}_2\text{CO}}$ ,  $J = 7.0$  Hz), 2.01 (t, 1H, CH alkyne,  $J = 2.5$  Hz), 1.88-1.78 (m, 2H, 1H  $\beta$ - $\text{CH}_2$ ,  $\beta$ - $\text{CH}_2$ ), 1.75-1.63 (m, 2H, 1H  $\beta$ - $\text{CH}_2$ , 1H  $\beta$ - $\text{CH}_2$ ), 1.60-1.50 (m, 2H,  $\delta$ - $\text{CH}_2$ ), 1.50-1.37 (m,



4H,  $\gamma$ -CH<sub>2</sub>,  $\delta$ -CH<sub>2</sub>), 1.43 (s, 9H, CH<sub>3</sub> <sup>t</sup>Bu), 1.35-1.23 (m, 2H,  $\gamma$ -CH<sub>2</sub>). <sup>13</sup>C NMR (100 MHz, CDCl<sub>3</sub>):  $\delta$ = 172.7 (C), 171.2 (C), 171.2 (C), 169.2 (C), 155.7 (C), 136.1 (C), 129.5 (CH), 128.6 (CH), 127.2 (CH), 83.1 (CH), 80.0 (C), 69.3 (C) 65.2 (CH), 54.1 (CH), 52.4 (CH<sub>3</sub>), 52.0 (CH), 38.7 (CH<sub>2</sub>), 38.5 (CH<sub>2</sub>), 38.3 (CH<sub>2</sub>), 35.3 (CH<sub>2</sub>), 32.0 (CH<sub>2</sub>), 30.9 (CH<sub>2</sub>), 28.8 (CH<sub>2</sub>), 28.7 (CH<sub>2</sub>), 28.3 (CH<sub>3</sub>), 22.3 (CH<sub>2</sub>), 22.1 (CH<sub>2</sub>), 15.0 (CH<sub>2</sub>). HRMS (ESI):  $m/z$  calcd. for C<sub>32</sub>H<sub>48</sub>N<sub>7</sub>O<sub>7</sub> [M + H]<sup>+</sup> 642.3615, found 642.3627.

**Linear peptidomimetic 12.** A procedure analogous to the one used for the synthesis of **7a** but using **4a** and Boc-*L*-4-amino-Phe(*N*-Pentynoyl)-OH as starting materials yielded **12** as a yellowish solid (770 mg, 87% yield). In this case the product was not purified by column chromatography as in our hands it proved to be unstable to silica gel. The estimated purity is more than 80% (<sup>1</sup>H NMR).  $[\alpha]_D^{25}$  = -2.0 (c 0.5, CHCl<sub>3</sub>). mp= 145-147°C. IR:  $\nu_{max}$  (neat)/cm<sup>-1</sup> 3286, 2929, 2115, 1732, 1684, 1647, 1519; <sup>1</sup>H NMR (500 MHz, DMSO-*d*<sub>6</sub>):  $\delta$ = 9.90 (s, 1H, NH aniline), 8.23 (1H,  $\alpha$ 1-NH), 8.15 (t, 1H,  $\epsilon$ 1-NH), 7.47 (d, 2H, CH aniline,  $J$ = 8.5 Hz), 7.32-7.17 (m, 7H, CH arom.), 6.84 (d, 1H,  $\alpha$ 2-NH,  $J$ = 8.5 Hz), 4.25-4.18 (m, 1H,  $\alpha$ 1-CH), 4.17-4.13 (m, 1H,  $\alpha$ 2-CH), 3.92 (d, 1H,  $\alpha'$ -CH,  $J$ = 8.5 Hz,  $J$ = 6.5 Hz), 3.61 (s, 3H, CH<sub>3</sub>O), 3.09-2.88 (m, 5H,  $\beta'$ -CH<sub>2</sub>, 1H  $\beta$ 2-CH<sub>2</sub>,  $\epsilon$ -CH<sub>2</sub>), 2.79 (t, 1H, CH alkyne,  $J$ = 2.5 Hz), 2.69-2.64 (m, 1H,  $\beta$ 2-CH<sub>2</sub>) 2.54-2.33 (m, 4H, , CH<sub>2</sub>CH<sub>2</sub>CO), 1.75-0.80 (m, 6H,  $\beta$ 1-CH<sub>2</sub>,  $\gamma$ 1-CH<sub>2</sub>,  $\delta$ 1-CH<sub>2</sub>), 1.30 (s, 9H, CH<sub>3</sub> <sup>t</sup>Bu). <sup>13</sup>C NMR (125 MHz, DMSO- *d*<sub>6</sub>):  $\delta$ = 172.6 (C), 172.0 (C), 169.2 (C), 168.7 (C), 155.3 (C), 137.4 (C), 136.8 (C), 132.8 (C), 129.5 (CH), 129.2 (CH), 128.4 (CH), 126.8 (CH), 118.8 (CH), 83.7(CH), 78.1 (C), 71.6 (CH), 62.7 (CH), 55.6 (CH), 51.9 (CH<sub>3</sub>), 51.9 (CH), 38.4 (CH<sub>2</sub>), 37.1 (CH<sub>2</sub>), 36.9 (CH<sub>2</sub>), 35.3 (CH<sub>2</sub>), 30.7 (CH<sub>2</sub>), 28.5 (CH<sub>2</sub>), 28.3 (CH<sub>3</sub>), 22.6 (CH<sub>2</sub>), 14.2 (CH<sub>2</sub>). HRMS (ESI):  $m/z$  calcd. for C<sub>35</sub>H<sub>45</sub>N<sub>7</sub>O<sub>7</sub>Na [M + Na]<sup>+</sup> 698.3278, found 698.3278.

### Macrocyclic peptidomimetics synthesis.

**Macrocyclic peptidomimetic 8a (1S,2S,3S-1,4-triazole).** **7a** (310 mg, 0.48 mmol, 1 eq) was suspended in dry THF (400 mL) in a three neck round-bottomed flask, DIPEA (0.24 mL, 1.45 mmol, 3 eq) was added. The reaction mixture was bubbled with Argon for 30 min. At this point CuI (184 mg, 0.97 mmol, 2 eq) was added and the reaction refluxed under N<sub>2</sub> for 15h. The solvent was removed under reduced pressure and the product was purified by column chromatography (CH<sub>2</sub>Cl<sub>2</sub>-MeOH) yielding 279 mg of a white solid. 156.8 mg of this solid were treated with 1.25M HCl-MeOH (2.75 mL) 24h at rt, the solvent was removed under reduced pressure, co-evaporations with MeOH and CH<sub>2</sub>Cl<sub>2</sub> were performed. **8a** was obtained as an off-white solid (141 mg, 90% yield over 2 steps).  $[\alpha]_D^{25} = +6.4$  (c 0.5, MeOH). mp= 227-228°C. IR:  $\nu_{max}$  (neat)/cm<sup>-1</sup> 3240, 3060, 2935, 1735, 1665, 1550, 1438, 1216; <sup>1</sup>H NMR (500 MHz, DMSO-*d*<sub>6</sub>):  $\delta$ = 8.90 (d, 1H,  $\alpha$ -NH,  $J$ = 6.0 Hz), 8.67 (t, 1H,  $\epsilon$ -NH,  $J$ = 5.5 Hz), 8.23 (d, 3H, NH<sub>3</sub><sup>+</sup>,  $J$ = 4.5 Hz), 7.84 (t, 1H,  $\epsilon$ -NH,  $J$ = 5.5 Hz), 7.81 (s, 1H, CH triazole), 7.24-7.15 (m, 5H, CH arom.), 5.61 (dd, 1H,  $\alpha'$ -CH,  $J$ = 9.0 Hz,  $J'$ = 6.5 Hz), 4.12-4.08 (m, 1H,  $\alpha$ -CH), 3.96-3.92 (m, 1H,  $\alpha$ -CH), 3.60 (s, 3H, CH<sub>3</sub>), 3.41 (dd, 1H,  $\beta'$ -CH<sub>2</sub>,  $J$ = 14.0 Hz,  $J'$ = 6.5 Hz), 3.31 (dd, 1H,  $\beta'$ -CH<sub>2</sub>,  $J$ = 14.0 Hz,  $J'$ = 9.0 Hz), 3.16-3.07 (m, 1H, 1H  $\epsilon$ -CH<sub>2</sub>), 3.09-3.01 (m, 2H,  $\epsilon$ -CH<sub>2</sub>), 3.02-2.94 (m, 1H,  $\epsilon$ -CH<sub>2</sub>), 2.90-2.79 (m, 2H, CH<sub>2</sub>CH<sub>2</sub>CO), 2.38-2.35 (m, 2H, CH<sub>2</sub>CH<sub>2</sub>CO), 1.80-1.60 (m, 4H,  $\beta$ -CH<sub>2</sub>), 1.55-1.20 (m, 8H,  $\gamma$ -CH<sub>2</sub>,  $\delta$ -CH<sub>2</sub>). <sup>13</sup>C NMR (125 MHz, DMSO-*d*<sub>6</sub>): 171.4 (C), 170.9 (C), 168.8 (C), 167.2 (C), 145.8 (C), 136.3 (C), 128.8 (CH), 128.2 (CH), 126.6 (CH), 121.2 (CH), 63.6 (CH), 52.4 (CH), 51.8 (CH<sub>3</sub>), 51.7 (CH), 38.0 (CH<sub>2</sub>), 37.7 (CH<sub>2</sub>), 37.1 (CH<sub>2</sub>), 34.3 (CH<sub>2</sub>), 30.7 (CH<sub>2</sub>), 28.8 (CH<sub>2</sub>), 28.1 (CH<sub>2</sub>), 28.1 (CH<sub>2</sub>), 21.8 (CH<sub>2</sub>). 21.2, (CH<sub>2</sub>) 21.0 (CH<sub>2</sub>). HRMS (ESI):  $m/z$  calcd. for C<sub>27</sub>H<sub>40</sub>N<sub>7</sub>O<sub>5</sub> [M + H]<sup>+</sup> 542.3091, found 542.3095.

**Macrocyclic peptidomimetic 8b (1S,2R,3S-1,4-triazole).** A procedure analogous to the one used for the synthesis of **8a** but using **7b** as starting material afforded **8b** as an off-white solid (167 mg, 81% yield).  $[\alpha]_D^{25} = -15.2$  (c 0.31, DMSO-*d*<sub>6</sub>). mp= 191-193°C. IR:  $\nu_{max}$  (neat)/cm<sup>-1</sup> 3283, 2934, 1718, 1649, 1548; <sup>1</sup>H NMR (500 MHz, DMSO-*d*<sub>6</sub>):  $\delta$ = 8.92 (d, 1H,  $\alpha$ -NH,  $J$ = 8.0 Hz), 8.51 (t, 1H,

$\epsilon$ -NH,  $J= 5.5$  Hz), 8.21 (d, 3H,  $\text{NH}_3^+$ ,  $J= 4.5$  Hz), 7.83 (s, 1H, CH triazole), 7.81 (t, 1H,  $\epsilon$ -NH,  $J= 5.5$  Hz), 7.25-7.15 (m, 5H, CH arom.), 5.43 (dd, 1H,  $\alpha'$ -CH,  $J= 9.0$  Hz,  $J'= 6.5$  Hz), 4.40-4.36 (m, 1H,  $\alpha$ -CH), 3.86-3.80 (m, 1H,  $\alpha$ -CH), 3.66 (s, 3H,  $\text{CH}_3$ ), 3.37 (dd, 1H,  $\beta'$ - $\text{CH}_2$ ,  $J= 14.0$  Hz,  $J'= 6.5$  Hz), 3.25 (dd, 1H,  $\beta'$ - $\text{CH}_2$ ,  $J= 14.0$  Hz,  $J'= 9.0$  Hz), 3.03-2.86 (m, 4H,  $\epsilon$ - $\text{CH}_2$ ), 2.86-2.81 (m, 2H,  $\underline{\text{CH}_2\text{CH}_2\text{CO}}$ ), 2.39-2.27 (m, 2H,  $\text{CH}_2\underline{\text{CH}_2\text{CO}}$ ), 1.80-1.60 (m, 4H, 2  $\beta$ - $\text{CH}_2$ ), 1.40-1.10 (m, 8H,  $\gamma$ - $\text{CH}_2$ ,  $\delta$ - $\text{CH}_2$ ).  $^{13}\text{C}$  NMR (125 MHz,  $\text{DMSO-}d_6$ ): 171.8 (C), 170.6 (C), 168.6 (C), 167.1 (C), 145.5 (C), 136.2 (C), 128.8 (CH), 128.2 (CH), 126.6 (CH), 121.0 (CH), 63.6 (CH), 52.0 ( $\text{CH}_3$ ), 51.9 (CH), 51.1 (CH), 38.6 ( $\text{CH}_2$ ), 38.0 ( $\text{CH}_2$ ), 37.8 ( $\text{CH}_2$ ), 34.5 ( $\text{CH}_2$ ), 30.9 ( $\text{CH}_2$ ), 30.5 ( $\text{CH}_2$ ), 28.6 ( $\text{CH}_2$ ), 28.0 ( $\text{CH}_2$ ), 22.2 ( $\text{CH}_2$ ), 21.4, ( $\text{CH}_2$ ) 21.3 ( $\text{CH}_2$ ). HRMS (ESI):  $m/z$  calcd. for  $\text{C}_{27}\text{H}_{40}\text{N}_7\text{O}_5$  [ $\text{M} + \text{H}$ ] $^+$ , 542.3091, found 542.3116.

**Macrocyclic peptidomimetic 8c (1S,2S,3R-1,4-triazole).** A procedure analogous to the one used for the synthesis of **8a** but using **7c** as starting material afforded **8c** as an off-white solid (47 mg, 68% yield).  $[\alpha]_D^{25} = -4.8$  (c 0.37, MeOH). mp= 230-231°C. IR:  $\nu_{\text{max}}$  (neat)/ $\text{cm}^{-1}$  3250, 3040, 2933, 1738, 1663, 1552, 1438, 1213;  $^1\text{H}$  NMR (500 MHz,  $\text{DMSO-}d_6$ ):  $\delta = 8.74$  (t, 1H,  $\epsilon$ -NH,  $J= 6.0$  Hz), 8.55 (d, 1H,  $\alpha$ -NH,  $J= 6.0$  Hz), 8.27 (d, 3H,  $\text{NH}_3^+$ ,  $J= 4.0$  Hz), 7.84 (s, 1H, CH triazole), 7.81 (t, 1H,  $\epsilon$ -NH,  $J= 5.5$  Hz), 7.25-7.18 (m, 5H, CH arom.), 5.51 (dd, 1H,  $\alpha'$ -CH,  $J= 9.0$  Hz,  $J'= 7.0$  Hz), 4.02 (dd, 1H,  $\alpha$ -CH,  $J= 13.0$  Hz,  $J'= 6.0$  Hz), 3.92-3.85 (m, 1H,  $\alpha$ -CH), 3.58 (s, 3H,  $\text{CH}_3$ ), 3.38 (dd, 1H,  $\beta'$ - $\text{CH}_2$ ,  $J= 14.0$  Hz,  $J'= 7.0$  Hz), 3.30 (dd, 1H,  $\beta'$ - $\text{CH}_2$ ,  $J= 14.0$  Hz,  $J'= 9.0$  Hz), 3.15-2.98 (m, 4H,  $\epsilon$ - $\text{CH}_2$ ), 2.91-2.80 (m, 2H,  $\underline{\text{CH}_2\text{CH}_2\text{CO}}$ ), 2.45-2.33 (m, 2H,  $\text{CH}_2\underline{\text{CH}_2\text{CO}}$ ), 1.85-1.65 (m, 4H, 2  $\beta$ - $\text{CH}_2$ ), 1.45-1.05 (m, 8H,  $\gamma$ - $\text{CH}_2$ ,  $\delta$ - $\text{CH}_2$ ).  $^{13}\text{C}$  NMR (125 MHz,  $\text{DMSO-}d_6$ ): 171.6 (C), 170.9 (C), 168.8 (C), 167.8 (C), 146.1 (C), 136.1 (C), 128.9 (CH), 128.2 (CH), 126.6 (CH), 120.6 (CH), 63.7 (CH), 52.7 (CH), 51.8 ( $\text{CH}_3$ ), 51.8 (CH), 37.7 ( $\text{CH}_2$ ), 37.4 ( $\text{CH}_2$ ), 37.4 ( $\text{CH}_2$ ), 34.5 ( $\text{CH}_2$ ), 30.7 ( $\text{CH}_2$ ), 28.9 ( $\text{CH}_2$ ), 28.3 ( $\text{CH}_2$ ), 28.0 ( $\text{CH}_2$ ), 21.9 ( $\text{CH}_2$ ), 20.9 ( $\text{CH}_2$ ).  $\text{C}_{27}\text{H}_{40}\text{N}_7\text{O}_5$  [ $\text{M} + \text{H}$ ] $^+$  542.3091, found 542.3107.

**Macrocyclic peptidomimetic 9a (1S,2S,3S-1,5-triazole).** **7a** (100 mg, 0.156 mmol, 1 eq) was suspended in dry toluene (125 mL) under Argon. The reaction mixture was heated to 80°C and

bubbled with Argon for 30 min.  $[\text{Cp}^*\text{RuCl}]_4$  (16.9 mg, 0.016 mmol, 0.1 eq) was added and the reaction was refluxed for 20h. Then, it was cooled to rt, filtered through a pad of Celite washing it with  $\text{CH}_2\text{Cl}_2$  and MeOH. The filtrate was evaporated to dryness under reduced pressure and purified by column chromatography ( $\text{CH}_2\text{Cl}_2$ -MeOH, 95:5) yielding 90.2 mg of a white solid. 87.7 mg of this solid were treated with 1.25M HCl-MeOH (2.75 mL) 24h at rt, the solvent was removed under reduced pressure and co-evaporations with MeOH and  $\text{CH}_2\text{Cl}_2$  were performed. **9a** was obtained as an off-white solid (78.9 mg, 90% yield over 2 steps).  $[\alpha]_D^{25} = +39.8$  (c 0.54, MeOH). mp= 233-235°C. IR:  $\nu_{\text{max}}$  (neat)/ $\text{cm}^{-1}$  3250, 3060, 2932, 1743, 1672, 1552, 1443, 1218;  $^1\text{H}$  NMR (500 MHz,  $\text{DMSO-}d_6$ ):  $\delta = 9.03$  (d, 1H,  $\alpha$ -NH,  $J = 5.5$  Hz), 8.83 (t, 1H,  $\epsilon$ -NH,  $J = 5.5$  Hz), 8.21 (d, 3H,  $\text{NH}_3^+$ ,  $J = 4.0$  Hz), 7.96 (t, 1H,  $\epsilon$ -NH,  $J = 5.5$  Hz), 7.40 (s, 1H, CH triazole), 7.29-7.12 (m, 5H, CH arom.), 5.75 (dd, 1H,  $\alpha'$ -CH,  $J = 10.5$  Hz,  $J' = 5.0$  Hz), 4.18-4.15 (m, 1H,  $\alpha$ -CH), 4.12-4.06 (m, 1H,  $\alpha$ -CH), 3.62 (dd, 1H,  $\beta'$ -CH<sub>2</sub>,  $J = 14.0$  Hz,  $J' = 10.5$  Hz), 3.54 (s, 3H, CH<sub>3</sub>), 3.40 (dd, 1H,  $\beta'$ -CH<sub>2</sub>,  $J = 14.0$  Hz,  $J' = 5.0$  Hz), 3.29-3.22 (m, 1H,  $\epsilon$ -CH<sub>2</sub>), 3.16-3.09 (m, 2H,  $\epsilon$ -CH<sub>2</sub>), 3.00-2.92 (m, 1H,  $\epsilon$ -CH<sub>2</sub>), 2.72 (t, 2H,  $\underline{\text{CH}_2\text{CH}_2\text{CO}}$ ,  $J = 8.5$  Hz), 2.37-2.26 (m, 2H,  $\text{CH}_2\underline{\text{CH}_2\text{CO}}$ ), 1.84-1.25 (m, 12H,  $\beta$ -CH<sub>2</sub>,  $\gamma$ -CH<sub>2</sub>,  $\delta$ -CH<sub>2</sub>).  $^{13}\text{C}$  NMR (125 MHz,  $\text{DMSO-}d_6$ ): 171.3 (C), 170.4 (C), 169.1 (C), 167.2 (C), 137.2 (C), 136.9 (C), 130.8 (CH), 129.1 (CH), 127.9 (CH), 126.4 (CH), 61.5 (CH), 52.7 (CH), 51.7 (CH), 51.6 (CH<sub>3</sub>), 37.2 (CH<sub>2</sub>), 37.1 (CH<sub>2</sub>), 36.7 (CH<sub>2</sub>), 33.9 (CH<sub>2</sub>), 30.6 (CH<sub>2</sub>), 28.9 (CH<sub>2</sub>), 28.0 (CH<sub>2</sub>), 21.2, (CH<sub>2</sub>) 21.0 (CH<sub>2</sub>), 19.0 (CH<sub>2</sub>).  $\text{C}_{27}\text{H}_{40}\text{N}_7\text{O}_5$   $[\text{M} + \text{H}]^+$  542.3091, found 542.3105.

**Macrocyclic peptidomimetic 9b (1S,2R,3S-1,5-triazole).** A procedure analogous to the one used for the synthesis of **9a** but using **7b** as starting material afforded **9b** as an off-white solid (162 mg, 90% yield).  $[\alpha]_D^{25} = -55.4$  (c 0.36, MeOH). mp= 295-297°C. IR:  $\nu_{\text{max}}$  (neat)/ $\text{cm}^{-1}$  3215, 3040, 2935, 1736, 1668, 1552, 1439, 1218;  $^1\text{H}$  NMR (500 MHz,  $\text{DMSO-}d_6$ ):  $\delta = 8.88$  (d, 1H,  $\alpha$ -NH,  $J = 7.5$  Hz), 8.24-8.17 (m, 4H,  $\text{NH}_3^+$  and  $\epsilon$ -NH), 8.02 (t, 1H,  $\epsilon$ -NH,  $J = 5.5$  Hz), 7.39 (s, 1H, CH triazole), 7.19-7.07 (m, 5H, CH arom.), 5.44 (dd, 1H,  $\alpha'$ -CH,  $J = 10.0$  Hz,  $J' = 5.5$  Hz), 4.29-4.24 (m, 1H,  $\alpha$ -CH), 3.84-3.77 (m, 1H,  $\alpha$ -CH), 3.66 (s, 3H, CH<sub>3</sub>), 3.50-3.45 (m, 2H,  $\beta'$ -CH<sub>2</sub>), 3.12-2.98 (m, 2H,  $\epsilon$ -CH<sub>2</sub>), 2.98-2.93 (m, 2H,  $\epsilon$ -CH<sub>2</sub>), 2.66-2.57 (m, 1H,  $\underline{\text{CH}_2\text{CH}_2\text{CO}}$ ), 2.47-2.42 (m, 1H,  $\underline{\text{CH}_2\text{CH}_2\text{CO}}$ ),

2.37-2.31 (m, 2H,  $\text{CH}_2\text{CH}_2\text{CO}$ ), 1.78-1.57 (m, 4H,  $\beta\text{-CH}_2$ ), 1.42-1.35 (m, 2H,  $\delta\text{-CH}_2$ ), 1.30-1.10 (m, 6H, 2 x  $\gamma\text{-CH}_2$ ,  $\delta\text{-CH}_2$ ).  $^{13}\text{C}$  NMR (125 MHz,  $\text{DMSO-}d_6$ ): 172.0 (C), 170.7 (C), 168.4 (C), 167.0 (C), 137.5 (C), 136.9 (C), 131.3 (CH), 128.9 (CH), 128.0 (CH), 126.4 (CH), 61.5 (CH), 52.0 ( $\text{CH}_3$ ), 51.9 (CH), 51.7 (CH), 38.3 ( $\text{CH}_2$ ), 38.0 ( $\text{CH}_2$ ), 36.7 ( $\text{CH}_2$ ), 33.6 ( $\text{CH}_2$ ), 30.6 ( $\text{CH}_2$ ), 30.3 ( $\text{CH}_2$ ), 28.8 ( $\text{CH}_2$ ), 27.9 ( $\text{CH}_2$ ), 22.2, ( $\text{CH}_2$ ) 20.8 ( $\text{CH}_2$ ), 17.8 ( $\text{CH}_2$ ).  $\text{C}_{27}\text{H}_{40}\text{N}_7\text{O}_5$   $[\text{M} + \text{H}]^+$  542.3091, found 542.3080.

**Macrocyclic peptidomimetic 9c (1S,2S,3R-1,5-triazole).** A procedure analogous to the one used for the synthesis of **9a** but using **7c** as starting material afforded **9c** as an off-white solid (54 mg, 87% yield).  $[\alpha]_D^{25} = +6.4$  (c 0.37, MeOH). mp= 251-253°C. IR:  $\nu_{\text{max}}$  (neat)/ $\text{cm}^{-1}$  3240, 3040, 2921, 1736, 1666, 1550, 1438, 1213;  $^1\text{H}$  NMR (500 MHz,  $\text{DMSO-}d_6$ ):  $\delta$ = 8.60 (d, 1H,  $\alpha\text{-NH}$ ,  $J = 5.5$  Hz), 8.35 (t, 1H,  $\epsilon\text{-NH}$ ,  $J = 5.5$  Hz), 8.20 (d, 3H,  $\text{NH}_3^+$ ,  $J = 4.5$  Hz), 7.97 (t, 1H,  $\epsilon\text{-NH}$ ,  $J = 5.5$  Hz), 7.36 (s, 1H, CH triazole), 7.20-7.07 (m, 5H, CH arom.), 5.42 (dd, 1H,  $\alpha'\text{-CH}$ ,  $J = 10.0$  Hz,  $J' = 5.5$  Hz), 4.10-4.07 (m, 1H,  $\alpha\text{-CH}$ ), 3.75-3.68 (m, 1H,  $\alpha\text{-CH}$ ), 3.61 (s, 3H,  $\text{CH}_3$ ), 3.51 (dd,  $\alpha'\text{-CH}$  1H,  $J = 14.0$  Hz,  $J' = 5.5$  Hz), 3.40 (dd, 1H,  $\beta'\text{-CH}_2$ ,  $J = 14.0$  Hz,  $J' = 10.0$  Hz), 3.16-3.02 (m, 4H,  $\epsilon\text{-CH}_2$ ), 2.69-2.63 (m, 1H,  $\text{CH}_2\text{CH}_2\text{CO}$ ), 2.57-2.45 (m, 1H,  $\text{CH}_2\text{CH}_2\text{CO}$ ), 2.43-2.33 (m, 2H,  $\text{CH}_2\text{CH}_2\text{CO}$ ), 1.80-1.60 (m, 4H,  $\beta\text{-CH}_2$ ), 1.50-1.20 (m, 8H,  $\gamma\text{-CH}_2$ ,  $\delta\text{-CH}_2$ ).  $^{13}\text{C}$  NMR (125 MHz,  $\text{DMSO-}d_6$ ): 171.3 (C), 170.7 (C), 168.7 (C), 167.0 (C), 137.5 (C), 136.8 (C), 131.2 (CH), 128.9 (CH), 128.0 (CH), 126.4 (CH), 61.7 (CH), 52.6 (CH), 51.9 ( $\text{CH}_3$ ), 51.8 (CH), 38.4 ( $\text{CH}_2$ ), 37.2 ( $\text{CH}_2$ ), 36.7 ( $\text{CH}_2$ ), 33.3 ( $\text{CH}_2$ ), 30.3 ( $\text{CH}_2$ ), 29.3 ( $\text{CH}_2$ ), 28.2 ( $\text{CH}_2$ ), 28.1 ( $\text{CH}_2$ ), 21.8 ( $\text{CH}_2$ ) 21.0 ( $\text{CH}_2$ ), 18.2 ( $\text{CH}_2$ ).  $\text{C}_{27}\text{H}_{40}\text{N}_7\text{O}_5$   $[\text{M} + \text{H}]^+$  542.3091, found 542.3071.

**Macrocyclic Diketopiperazine 10a (1S,2S,3S-1,4-triazole).** **8a** (50 mg, 0.086 mmol) and morpholinomethyl-polystyrene (136.8 mg, 0.48 mmol) were placed in a microwave (MW) tube. 2-butanol (6 mL) was added followed by AcOH (35  $\mu\text{L}$ , 0.61 mmol). The mixture was heated with MW (150°C) for 3h. Then the resin was filtered and washed with MeOH,  $\text{CH}_2\text{Cl}_2$ . The filtrate was evaporated to dryness under reduced pressure, performing co-evaporations with  $\text{CH}_2\text{Cl}_2$  (3x). Final DKP compound **10a** was obtained as an off-white solid (41.4 mg, 94%).  $[\alpha]_D^{25}$

$d_D = -7.1$  (c 0.36, MeOH). mp= 229-230°C. IR:  $\nu_{max}$  (neat)/ $\text{cm}^{-1}$  3250, 3040, 2923, 1666, 1640, 1544, 1454;  $^1\text{H}$  NMR (500 MHz, DMSO- $d_6$ ):  $\delta = 8.34$  (t, 1H,  $\epsilon$ -NH,  $J = 5.5$  Hz), 8.18 (d, 1H,  $\alpha$ -NH,  $J = 2.5$  Hz), 8.04 (d, 1H,  $\alpha$ -NH,  $J = 2.5$  Hz), 7.80 (s, 1H, CH triazole), 7.78 (t, 1H,  $\epsilon$ -NH,  $J = 5.5$  Hz), 7.25-7.11 (m, 5H, CH arom.), 5.44 (dd, 1H,  $\alpha'$ -CH,  $J = 9.5$  Hz,  $J' = 6.0$  Hz), 3.80-3.76 (m, 1H,  $\alpha$ -CH), 3.68-3.64 (m, 1H,  $\alpha$ -CH), 3.30 (dd, 1H,  $\beta'$ -CH<sub>2</sub>,  $J = 14.0$  Hz,  $J' = 6.0$  Hz), 3.19 (dd, 1H,  $\beta'$ -CH<sub>2</sub>,  $J = 14.0$  Hz,  $J' = 9.5$  Hz), 3.14-2.94 (m, 4H,  $\epsilon$ -CH<sub>2</sub>), 2.91-2.77 (m, 2H, CH<sub>2</sub>CH<sub>2</sub>CO), 2.40-2.30 (m, 2H, CH<sub>2</sub>CH<sub>2</sub>CO), 1.75-1.55 (m, 4H,  $\beta$ -CH<sub>2</sub>), 1.50-1.10 (m, 8H,  $\gamma$ -CH<sub>2</sub>,  $\delta$ -CH<sub>2</sub>).  $^{13}\text{C}$  NMR (125 MHz, DMSO- $d_6$ ): 170.8 (C), 167.5 (C), 167.3 (C), 167.0 (C), 145.6 (C), 136.1 (C), 128.8 (CH), 128.2 (CH), 126.8 (CH), 121.0 (CH), 63.6 (CH), 54.1 (CH), 53.9 (CH), 38.5 (CH<sub>2</sub>), 38.0 (CH<sub>2</sub>), 38.0 (CH<sub>2</sub>), 34.5 (CH<sub>2</sub>), 34.3 (CH<sub>2</sub>), 33.1 (CH<sub>2</sub>), 29.0 (CH<sub>2</sub>), 28.6 (CH<sub>2</sub>), 21.6, (CH<sub>2</sub>) 21.2 (CH<sub>2</sub>), 21.2 (CH<sub>2</sub>). C<sub>26</sub>H<sub>36</sub>N<sub>7</sub>O<sub>4</sub> [M + H]<sup>+</sup> 510.2829, found 510.2841.

**Macrocyclic Diketopiperazine 10b (1S,2R,3S-1,4-triazole).** A procedure analogous to the one used for the synthesis of **10a** but using **8b** as starting material and increasing the MW heating time to 4h yielded **10b** an off-white solid (41.9 mg, 93% yield).  $[\alpha]_D^{25} = +22.8$  (c 0.38, MeOH). mp= 249-251°C. IR:  $\nu_{max}$  (neat)/ $\text{cm}^{-1}$  3260, 2929, 1653, 1547, 1436;  $^1\text{H}$  NMR (500 MHz, DMSO- $d_6$ ):  $\delta = 8.48$  (t, 1H,  $\epsilon$ -NH,  $J = 6.0$  Hz), 8.10 (s, 1H,  $\alpha$ -NH), 8.05 (d, 1H,  $\alpha$ -NH,  $J = 3.0$  Hz), 7.96 (t, 1H,  $\epsilon$ -NH,  $J = 5.5$  Hz), 7.83 (s, 1H, CH triazole), 7.24-7.16 (m, 3H, CH arom.), 7.09 (d, 2H, CH arom.,  $J = 7.0$  Hz), 5.45 (dd, 1H,  $\alpha'$ -CH,  $J = 10.0$  Hz,  $J' = 5.6$  Hz), 3.88-3.85 (m, 1H,  $\alpha$ -CH), 3.72-3.69 (m, 1H,  $\alpha$ -CH), 3.29-3.15 (m, 4H,  $\beta'$ -CH<sub>2</sub>, 1H  $\epsilon$ -CH<sub>2</sub>, 1H  $\epsilon$ CH<sub>2</sub>), 3.07-2.96 (m, 2H, 1H  $\epsilon$ -CH<sub>2</sub>, 1H  $\epsilon$ -CH<sub>2</sub>), 2.92-2.78 (m, 2H, CH<sub>2</sub>CH<sub>2</sub>CO), 2.47-2.30 (m, 2H, CH<sub>2</sub>CH<sub>2</sub>CO), 1.99-1.91 (m, 1H,  $\beta$ -CH<sub>2</sub>), 1.79-1.70 (m, 1H,  $\beta$ -CH<sub>2</sub>), 1.65-1.44 (m, 6H, 1H  $\beta$ -CH<sub>2</sub>, 1H  $\beta$ -CH<sub>2</sub>,  $\gamma$ -CH<sub>2</sub>,  $\delta$ -CH<sub>2</sub>), 1.42-1.20 (m, 4H,  $\gamma$ -CH<sub>2</sub>,  $\delta$ -CH<sub>2</sub>).  $^{13}\text{C}$  NMR (125 MHz, DMSO- $d_6$ ): 171.1 (C), 169.8 (C), 168.7 (C), 167.7 (C), 146.1 (C), 136.0 (C), 128.9 (CH), 128.2 (CH), 126.6 (CH), 120.3 (CH), 63.9 (CH), 54.6 (CH), 53.1 (CH), 38.6 (CH<sub>2</sub>), 38.5 (CH<sub>2</sub>), 37.4 (CH<sub>2</sub>), 33.8 (CH<sub>2</sub>), 32.3 (CH<sub>2</sub>), 31.7 (CH<sub>2</sub>), 28.8 (CH<sub>2</sub>), 28.3 (CH<sub>2</sub>), 23.0, (CH<sub>2</sub>) 21.3 (CH<sub>2</sub>), 20.9 (CH<sub>2</sub>). C<sub>26</sub>H<sub>36</sub>N<sub>7</sub>O<sub>4</sub> [M + H]<sup>+</sup> 510.2829, found 510.2818.

**Macrocyclic Diketopiperazine 10c (1*S*,2*S*,3*R*-1,4-triazole).** A procedure analogous to the one used for the synthesis of **10a** but using **8c** as starting material afforded **10c** as an off-white solid (43.8 mg, 90% yield).  $[\alpha]_D^{25} = +16.6$  (c 0.32, MeOH). mp= 230-231°C. IR:  $\nu_{max}$  (neat)/cm<sup>-1</sup> 3284, 2934, 1655, 1544, 1454; <sup>1</sup>H NMR (500 MHz, DMSO-*d*<sub>6</sub>):  $\delta$ = 8.34 (t, 1H,  $\epsilon$ -NH,  $J$ = 5.5 Hz), 8.11 (d, 1H,  $\alpha$ -NH,  $J$ = 2.5 Hz), 8.06 (d, 1H,  $\alpha$ -NH,  $J$ = 2.5 Hz), 7.85 (t, 1H,  $\epsilon$ -NH,  $J$ = 5.5 Hz), 7.74 (s, 1H, CH triazole), 7.25-7.13 (m, 5H, CH arom.), 5.47 (dd, 1H,  $\alpha'$ -CH,  $J$ = 10.0 Hz,  $J'$ = 6.0 Hz), 3.76-3.74 (m, 1H,  $\alpha$ -CH), 3.70-3.66 (m, 1H,  $\alpha$ -CH), 3.32 (dd, 1H,  $\beta'$ -CH<sub>2</sub>,  $J$ = 14.0 Hz,  $J'$ = 6.0 Hz), 3.22 (dd, 1H,  $\beta'$ -CH<sub>2</sub>,  $J$ = 14.0 Hz,  $J'$ = 10.0 Hz), 3.18-3.12 (m, 1H  $\epsilon$ -CH<sub>2</sub>), 3.11-3.05 (m, 1H  $\epsilon$ -CH<sub>2</sub>), 3.04-2.97 (m, 2H, 1H  $\epsilon$ -CH<sub>2</sub>, 1H  $\epsilon$ -CH<sub>2</sub>), 2.88-2.79 (m, 2H, CH<sub>2</sub>CH<sub>2</sub>CO), 2.35 (t, 2H, CH<sub>2</sub>CH<sub>2</sub>CO,  $J$ = 6.5 Hz), 1.81-1.73 (m, 2H, 1H  $\beta$ -CH<sub>2</sub>, 1H  $\beta$ -CH<sub>2</sub>), 1.69-1.62 (m, 1H,  $\beta$ -CH<sub>2</sub>), 1.58-1.52 (m, 1H,  $\beta$ -CH<sub>2</sub>), 1.46-1.38 (m, 2H,  $\delta$ -CH<sub>2</sub>), 1.38-1.30 (m, 4H,  $\gamma$ -CH<sub>2</sub>,  $\delta$ -CH<sub>2</sub>), 1.30-1.18 (m, 2H,  $\gamma$ -CH<sub>2</sub>). <sup>13</sup>C NMR (125 MHz, DMSO-*d*<sub>6</sub>): 170.8 (C), 167.4 (C), 167.3 (C), 167.2 (C), 145.6 (C), 136.1 (C), 128.8 (CH), 128.1 (CH), 126.6 (CH), 120.7 (CH), 63.6 (CH), 54.1 (CH), 54.1(CH), 38.4 (CH<sub>2</sub>), 38.0 (CH<sub>2</sub>), 37.7 (CH<sub>2</sub>), 34.5 (CH<sub>2</sub>), 34.1 (CH<sub>2</sub>), 33.1 (CH<sub>2</sub>), 29.0 (CH<sub>2</sub>), 28.7 (CH<sub>2</sub>), 21.8, (CH<sub>2</sub>) 21.1 (CH<sub>2</sub>). C<sub>26</sub>H<sub>36</sub>N<sub>7</sub>O<sub>4</sub> [M + H]<sup>+</sup> 510.2829, found 510.2807.

**Macrocyclic Diketopiperazine 11a (1*S*,2*S*,3*S*-1,5-triazole).** A procedure analogous to the one used for the synthesis of **10a** but using **9a** as starting material afforded **11a** as an off-white solid (46.5 mg, 91% yield).  $[\alpha]_D^{25} = -44.3$  (c 0.54, MeOH). mp= 182-184°C. IR:  $\nu_{max}$  (neat)/cm<sup>-1</sup> 3235, 2928, 1663, 1558, 1456. <sup>1</sup>H NMR (400 MHz, DMSO-*d*<sub>6</sub>):  $\delta$ = 8.16 (t, 1H,  $\epsilon$ -NH,  $J$ = 5.5 Hz), 8.00 (d, 1H,  $\alpha$ -NH,  $J$ = 1.5 Hz), 7.93-7.88 (m, 2H,  $\alpha$ -NH,  $\epsilon$ -NH) 7.38 (s, 1H, CH triazole), 7.21-7.08 (m, 5H, CH arom.), 5.36 (t, 1H,  $\alpha'$ -CH,  $J$ = 7.5 Hz), 3.90-3.86 (m, 1H,  $\alpha$ -CH), 3.84-3.79 (m, 1H,  $\alpha$ -CH), 3.48 (d, 2H,  $\beta'$ -CH<sub>2</sub>,  $J$ = 7.5 Hz), 3.20-2.80 (m, 4H,  $\epsilon$ -CH<sub>2</sub>), 2.60-2.30 (m, 4H, CH<sub>2</sub>CH<sub>2</sub>CO), 1.80-1.50 (m, 4H,  $\beta$ -CH<sub>2</sub>), 1.45-1.10 (m, 8H,  $\gamma$ -CH<sub>2</sub>,  $\delta$ -CH<sub>2</sub>). <sup>13</sup>C NMR (125 MHz, DMSO-*d*<sub>6</sub>): 170.6 (C), 167.0 (C), 167.0 (C), 166.9 (C), 137.5 (C), 136.9 (C), 131.0 (CH), 128.9 (CH), 128.0 (CH), 126.4 (CH), 61.5 (CH), 53.9 (CH), 53.7 (CH), 38.4 (CH<sub>2</sub>), 37.8 (CH<sub>2</sub>), 36.6 (CH<sub>2</sub>), 33.4 (CH<sub>2</sub>), 32.6

(CH<sub>2</sub>), 31.8 (CH<sub>2</sub>), 29.3 (CH<sub>2</sub>), 28.6 (CH<sub>2</sub>), 20.8, (CH<sub>2</sub>) 20.4 (CH<sub>2</sub>), 18.0 (CH<sub>2</sub>). C<sub>26</sub>H<sub>35</sub>N<sub>7</sub>O<sub>4</sub>Na [M + Na]<sup>+</sup> 532.2648, found 532.2650.

**Macrocyclic Diketopiperazine 11b (1*S*,2*R*,3*S*-1,5-triazole).** Compound **9b** was reacted using a procedure analogous to the one used for the synthesis of **6a** but increasing the MW heating time to 6h.. After removal of the solvent under reduced pressure, cold MeOH was added to the crude. The resulting white solid was washed with small amounts of cold MeOH and dried to yield **11b** (14.5 mg, 50% yield). [ $\alpha$ ]<sup>25</sup><sub>D</sub> = +24.8 (c 0.43, DMSO-*d*<sub>6</sub>). mp= 191-193°C. IR: *v*<sub>max</sub> (neat)/cm<sup>-1</sup> 3340, 3322, 3199, 2927, 1658, 1645, 1528, 1450; <sup>1</sup>H NMR (500 MHz, DMSO-*d*<sub>6</sub>):  $\delta$ = 8.23 (dd, 1H,  $\epsilon$ -NH, *J*= 7.1 Hz, *J*'= 3.5 Hz), 8.02 (d, 1H,  $\alpha$ -NH, *J*= 3.0 Hz), 7.94 (s, 1H,  $\alpha$ -NH), 7.86 (t, 1H, *J*= 3.0 Hz,  $\epsilon$ -NH), 7.35 (s, 1H, CH triazole), 7.24-7.13 (m, 5H, CH arom.), 5.36 (dd, 1H,  $\alpha'$ -CH, *J*= 10.0 Hz, *J*'= 5.0 Hz), 3.80-3.76 (m, 1H,  $\alpha$ -CH), 3.70-3.66 (m, 1H,  $\alpha$ -CH), 3.60 (dd, 1H,  $\beta'$ -CH<sub>2</sub>, *J*= 14.0 Hz, *J*'= 10.0 Hz), 3.49 (dd, 1H,  $\beta'$ -CH<sub>2</sub>, *J*= 14.0 Hz, *J*'= 5.0 Hz), 3.37-3.30 (m, 1H,  $\epsilon$ -CH<sub>2</sub>), 3.28-3.21 (m, 1H,  $\epsilon$ -CH<sub>2</sub>), 3.02-2.95 (m, 1H,  $\epsilon$ -CH<sub>2</sub>), 2.91-2.85 (m, 1H,  $\epsilon$ -CH<sub>2</sub>), 2.71-2.61 (m, 2H, CH<sub>2</sub>CH<sub>2</sub>CO), 2.43-2.30 (m, 2H, CH<sub>2</sub>CH<sub>2</sub>CO), 1.89-1.82 (m, 1H,  $\beta$ -CH<sub>2</sub>), 1.73-1.61 (m, 2H,  $\beta$ -CH<sub>2</sub>), 1.48-1.22 (m, 9H, 1H  $\beta$ -CH<sub>2</sub>,  $\gamma$ -CH<sub>2</sub>,  $\delta$ -CH<sub>2</sub>). <sup>13</sup>C NMR (125 MHz, DMSO- *d*<sub>6</sub>): 170.4 (C), 169.0 (C), 168.8 (C), 166.9 (C), 137.3 (C), 136.9 (C), 130.8 (CH), 128.9 (CH), 128.0 (CH), 126.4 (CH), 62.0 (CH), 54.8 (CH), 52.9 (CH), 38.5 (CH<sub>2</sub>), 37.2 (CH<sub>2</sub>), 36.2 (CH<sub>2</sub>), 32.5 (CH<sub>2</sub>), 32.3 (CH<sub>2</sub>), 31.1 (CH<sub>2</sub>), 28.7 (CH<sub>2</sub>), 27.6 (CH<sub>2</sub>), 22.7 (CH<sub>2</sub>), 21.0 (CH<sub>2</sub>), 18.6 (CH<sub>2</sub>). C<sub>26</sub>H<sub>36</sub>N<sub>7</sub>O<sub>4</sub> [M + H]<sup>+</sup> 510.2829, found 510.2838.

**Macrocyclic Diketopiperazine 11c (1*S*,2*S*,3*R*-1,5-triazole).** A procedure analogous to the one used for the synthesis of **10a** but using **9c** as starting material afforded **11c** as an off-white solid (32.5 mg, 91% yield). [ $\alpha$ ]<sup>25</sup><sub>D</sub> = +10.3 (c 0.39, MeOH). mp= 175-177°C. IR: *v*<sub>max</sub> (neat)/cm<sup>-1</sup> 3284, 2930, 1662, 1553, 1455; <sup>1</sup>H NMR (500 MHz, DMSO-*d*<sub>6</sub>):  $\delta$ = 8.13 (t, 1H,  $\epsilon$ -NH, *J*= 5.5 Hz), 7.96 (s, 2H, 2  $\alpha$ -NH), 7.88 (t, 1H,  $\epsilon$ -NH, *J*= 6.0 Hz), 7.37 (s, 1H, CH triazole), 7.19-7.08 (m, 5H, CH arom.), 5.42 (dd, 1H,  $\alpha'$ -CH, *J*= 9.0 Hz, *J*'= 6.5 Hz), 3.90-3.86 (m, 1H,  $\alpha$ -CH), 3.86-3.82 (m,



1H,  $\alpha$ -CH), 3.48-3.45 (m, 2H,  $\beta'$ -CH<sub>2</sub>), 3.18-2.92 (m, 4H, 2  $\epsilon$ -CH<sub>2</sub>), 2.60-2.46 (m, 2H, CH<sub>2</sub>CH<sub>2</sub>CO), 2.41-2.34 (m, 2H, CH<sub>2</sub>CH<sub>2</sub>CO), 1.80-1.68 (m, 2H,  $\beta$ -CH<sub>2</sub>), 1.59-1.48 (m, 2H,  $\beta$ -CH<sub>2</sub>), 1.45-1.05 (m, 8H,  $\gamma$ -CH<sub>2</sub>,  $\delta$ -CH<sub>2</sub>). <sup>13</sup>C NMR (125 MHz, DMSO-*d*<sub>6</sub>): 170.6 (C), 167.0 (C), 166.9 (C), 137.6 (C), 137.0 (C), 130.9 (CH), 128.9 (CH), 128.0 (CH), 126.4 (CH), 61.3 (CH), 54.0 (CH), 53.6 (CH), 38.5 (CH<sub>2</sub>), 37.7 (CH<sub>2</sub>), 36.6 (CH<sub>2</sub>), 33.1 (CH<sub>2</sub>), 32.6 (CH<sub>2</sub>), 31.6 (CH<sub>2</sub>), 29.3 (CH<sub>2</sub>), 28.3 (CH<sub>2</sub>), 20.6, (CH<sub>2</sub>) 20.5 (CH<sub>2</sub>), 17.8 (CH<sub>2</sub>). C<sub>26</sub>H<sub>35</sub>N<sub>7</sub>O<sub>4</sub>Na [M + Na]<sup>+</sup> 532.2648, found 532.2654.

**Macrocyclic peptidomimetic 13. 12** (176.8 mg, 0.261 mmol, 1 eq) was suspended in dry THF (215 mL) in a three neck round-bottomed flask, DBU (0.117 mL, 0.784 mmol, 3 eq) was added. The reaction mixture was bubbled with Argon for 30 min. At that point CuI (99.5 mg, 0.523 mmol, 2 eq) was added and the reaction refluxed under N<sub>2</sub> for 15h. The solvent was removed under reduced pressure. The reaction mixture was filtered and 79.6 mg of a white solid were obtained. 60 mg of this solid were treated with 1.25M HCl-dioxane (2.75 mL) 16h at rt, the solvent was removed under reduced pressure and co-evaporations with MeOH and CH<sub>2</sub>Cl<sub>2</sub> were performed. **8a** was obtained as a brownish solid (54.4 mg, 45% yield over 2 steps). The product was not purified by column chromatography due to its instability to silica gel. The estimated purity is more than 90% (low molecular weight impurities present, <sup>1</sup>H NMR) [ $\alpha$ ]<sub>D</sub><sup>25</sup> = +30.2 (c 0.39, DMSO-*d*<sub>6</sub>). mp > 300°C. IR: *ν*<sub>max</sub> (neat)/cm<sup>-1</sup> 3295, 2923, 1724, 1661, 1521, 1455; <sup>1</sup>H NMR (500 MHz, DMSO-*d*<sub>6</sub>):  $\delta$  = 9.89 (s, 1H, NH aniline), 8.50-8.42 (m, 3H, NH<sub>3</sub><sup>+</sup>), 8.35-8.30 (m, 2H,  $\epsilon$ -NH,  $\alpha$ 1-NH), 7.87 (s, 1H, CH triazole), 7.44 (d, 2H, CH aniline, *J* = 8.4 Hz), 7.25-7.11 (m, 7H, CH arom.), 5.38 (t, 1H,  $\alpha'$ -CH, *J* = 7.5 Hz), 4.00-3.92 (m, 1H,  $\alpha$ 2-CH), 3.73-3.67 (m,  $\alpha$ 1-CH), 3.54 (s, 3H, CH<sub>3</sub>), 3.50-3.30 (m, 1H,  $\beta'$ -CH<sub>2</sub>), 3.22 (dd, 1H,  $\beta'$ -CH<sub>2</sub>, *J* = 14.0 Hz, *J'* = 9.0 Hz), 3.14-3.05 (m, 2H, 1H  $\beta$ 2-CH<sub>2</sub>, 1H  $\epsilon$ -CH<sub>2</sub>), 2.98-2.86 (m, 2H, CH<sub>2</sub>CH<sub>2</sub>CO), 2.82 (dd, 1H,  $\beta$ 2-CH, *J* = 13.0 Hz, *J'* = 11.5 Hz), 2.78-2.70 (m, 1H,  $\epsilon$ 1-CH<sub>2</sub>), 2.70-2.58 (m, 2H, CH<sub>2</sub>CH<sub>2</sub>CO), 1.62-0.86 (m, 6H,  $\beta$ 1-CH<sub>2</sub>,  $\gamma$ 1-CH<sub>2</sub>,  $\delta$ 1-CH<sub>2</sub>). <sup>13</sup>C NMR (125 MHz, DMSO-*d*<sub>6</sub>):  $\delta$  = 170.8 (C), 169.7 (C), 167.1 (C), 166.6 (C), 145.7 (C), 137.8 (C), 136.2 (C), 129.4 (CH), 129.2 (C), 128.8 (CH), 128.1 (CH), 126.6 (CH), 120.7 (CH), 119.2 (CH), 63.8 (CH), 53.2 (CH), 52.7 (CH), 51.6 (CH<sub>3</sub>), 37.9, 37.7 (CH<sub>2</sub>), 37.5 (CH<sub>2</sub>), 36.1 (CH<sub>2</sub>), 35.0 (CH<sub>2</sub>),

29.6, 28.6 (CH<sub>2</sub>), 28.2, 28.0 (CH<sub>2</sub>), 21.7 (CH<sub>2</sub>), 20.8 (CH<sub>2</sub>). C<sub>30</sub>H<sub>38</sub>N<sub>7</sub>O<sub>5</sub> [M + H]<sup>+</sup> 576.2934, found 576.2947.

**Macrocyclic DKP 14.** Compound **13** was reacted using a procedure analogous to the one used for the synthesis of **10a** but increasing the MW heating time to 9h. Then the resin was filtered and washed with DMSO-DMF (1:1) and DMF. The final DKP compound **14** was obtained as a brownish solid (8.7 mg, 40% yield). The product was not purified by column chromatography due to its instability to silica gel. The estimated purity is more than 90% (low molecular weight impurities present, <sup>1</sup>H NMR). [α]<sup>25</sup><sub>D</sub> = +10.6 (c 0.51, DMSO-*d*<sub>6</sub>). mp > 300°C. IR: *v*<sub>max</sub> (neat)/cm<sup>-1</sup> 2928, 1666, 1517, 1454, 1411; <sup>1</sup>H NMR (500 MHz, DMSO-*d*<sub>6</sub>): δ = 9.79 (s, 1H, NH aniline), 8.16-8.11 (m, 2H, α-NH, ε-NH), 7.97 (d, 1H, α-NH, *J* = 1.8 Hz), 7.77 (s, 1H, CH triazole), 7.45 (d, 2H, CH arom., *J* = 8.5 Hz), 7.25-7.14 (m, 5H, CH arom.), 7.45 (d, 2H, CH arom., *J* = 8.5 Hz), 5.29 (t, 1H, α'-CH, *J* = 7.7 Hz), 4.14-4.11 (m, 1H, α<sub>2</sub>-CH), 3.42-3.24 (m, 3H, β'-CH<sub>2</sub>, α<sub>1</sub>-CH), 3.11-3.04 (m, 2H, 1H β<sub>2</sub>-CH<sub>2</sub>, 1H ε-CH<sub>2</sub>), 2.95-2.87 (m, 2H, CH<sub>2</sub>CH<sub>2</sub>CO), 2.73-2.58 (m, 3H, 1H β<sub>2</sub>-CH, CH<sub>2</sub>CH<sub>2</sub>CO), 2.56-2.44 (m, 1H, ε-CH<sub>2</sub>), 1.80-0.10 (m, 6H, β<sub>1</sub>-CH, γ<sub>1</sub>-CH<sub>2</sub>, δ<sub>1</sub>-CH<sub>2</sub>). <sup>13</sup>C NMR (125 MHz, DMSO-*d*<sub>6</sub>): δ = 169.6 (C), 166.9 (C), 166.5 (C), 165.8 (C), 146.3 (C), 138.3 (C), 136.6 (C), 130.8 (CH), 130.2 (C), 129.1 (CH), 128.4 (CH), 126.7 (CH), 120.5 (CH), 118.3 (CH), 103.1 (CH), 64.1 (CH), 55.5 (CH), 53.4 (CH), 38.1 (CH<sub>2</sub>), 37.7 (CH<sub>2</sub>), 36.9 (CH<sub>2</sub>), 35.2 (CH<sub>2</sub>), 33.7 (CH<sub>2</sub>), 31.9 (CH<sub>2</sub>), 27.9 (CH<sub>2</sub>), 23.2 (CH<sub>2</sub>), 21.2 (CH<sub>2</sub>), 20.4 (CH<sub>2</sub>). C<sub>29</sub>H<sub>34</sub>N<sub>7</sub>O<sub>4</sub> [M + H]<sup>+</sup> 544.2672, found 544.2697.

H-L- Lys(L-N<sub>3</sub>-Phe)-OMe·TFA 4a.

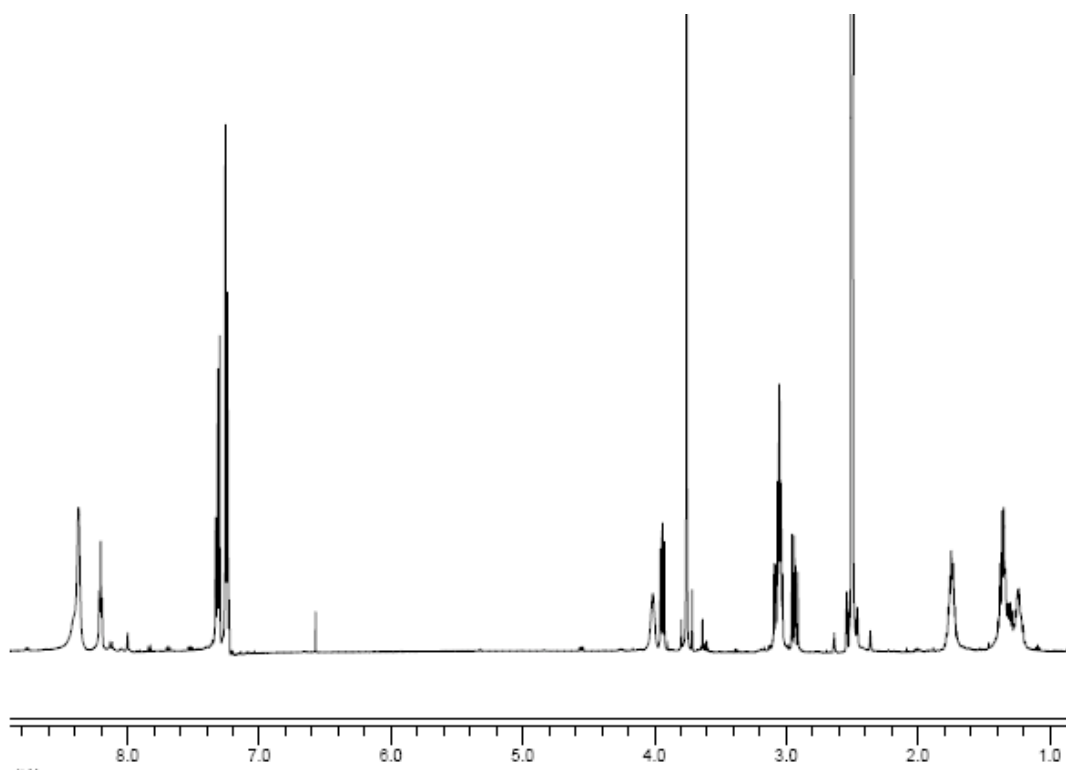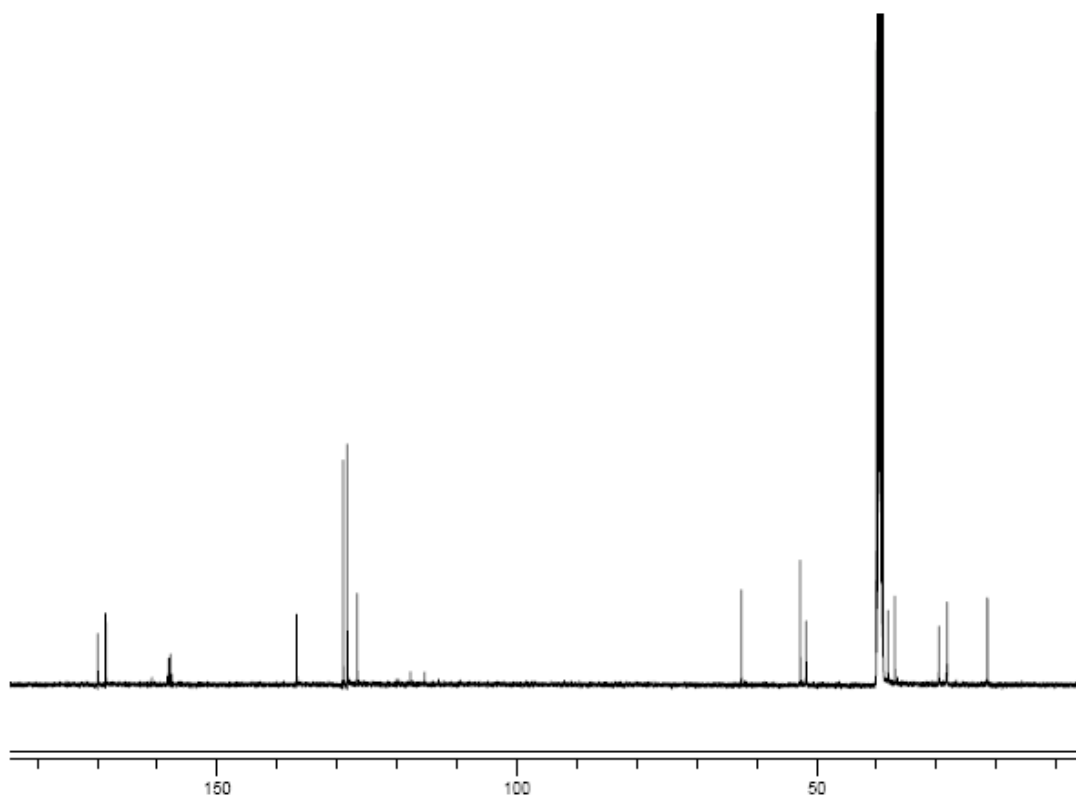

H-L- Lys(D-N<sub>3</sub>-Phe)-OMe·TFA 4b.

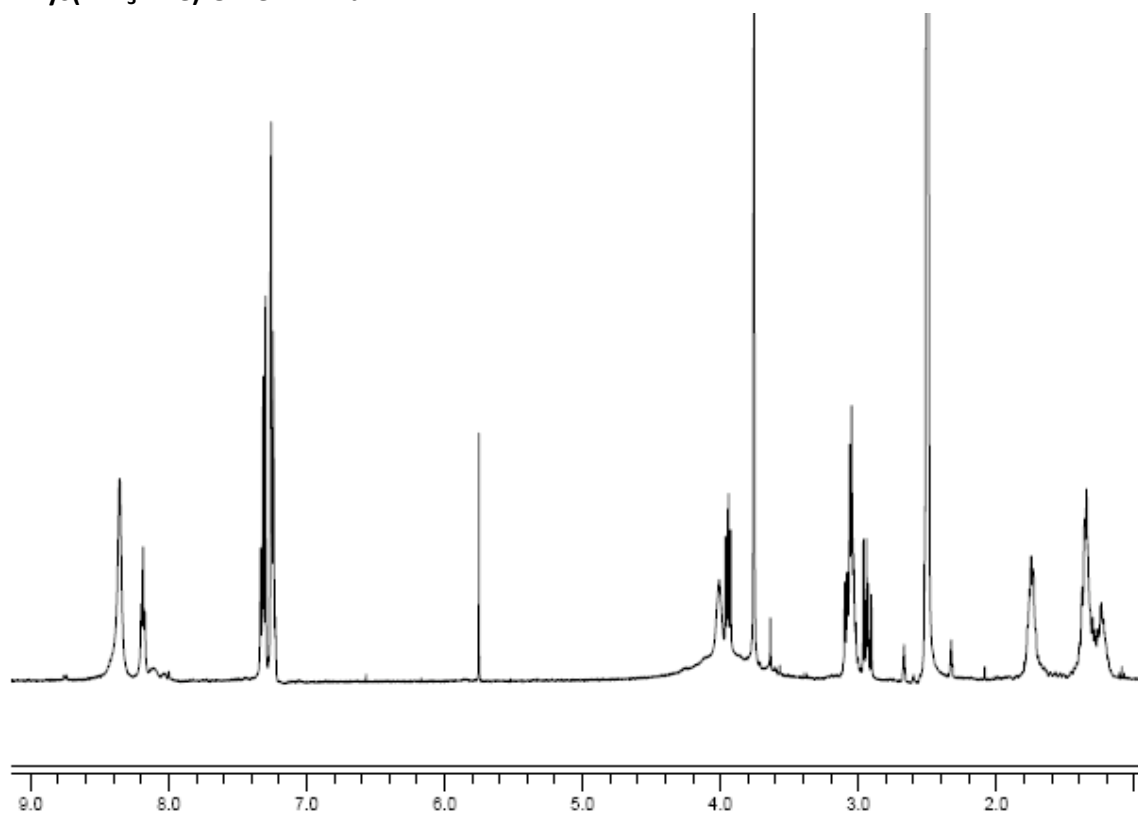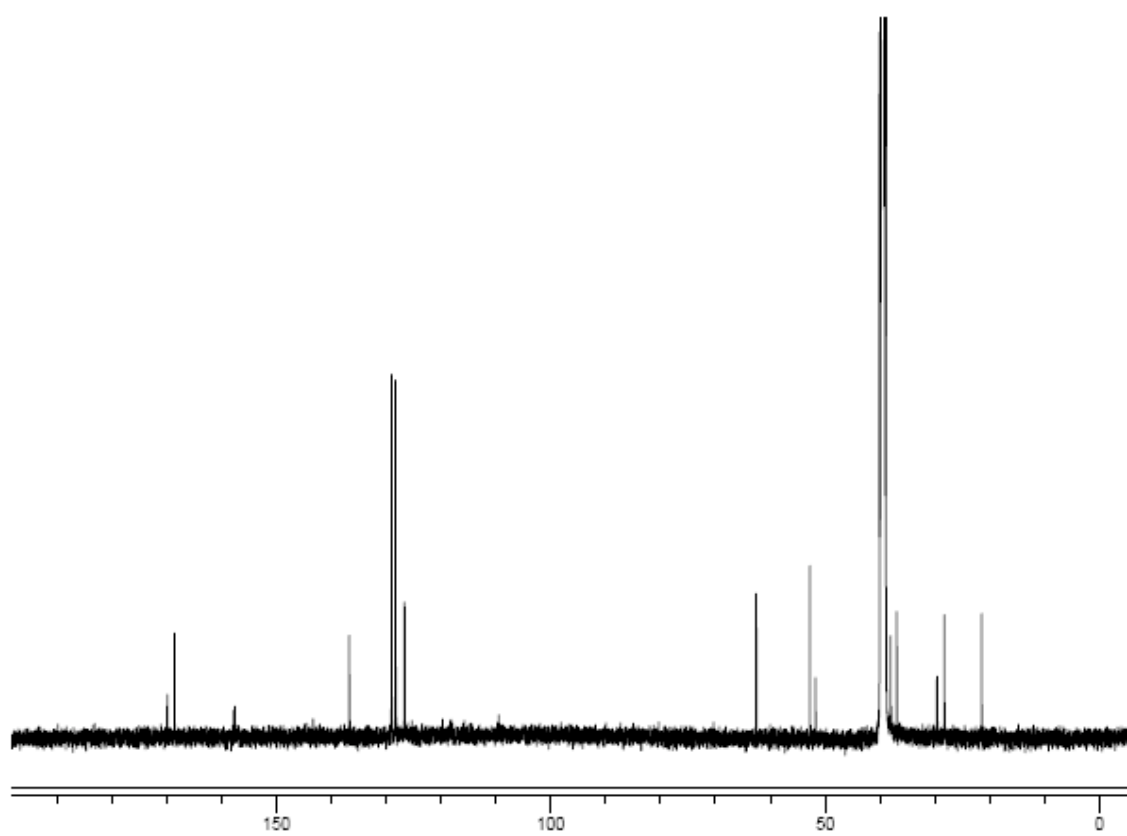

**Boc-L- Lys(*N*-4-Pentynoyl)-OH 6a.**

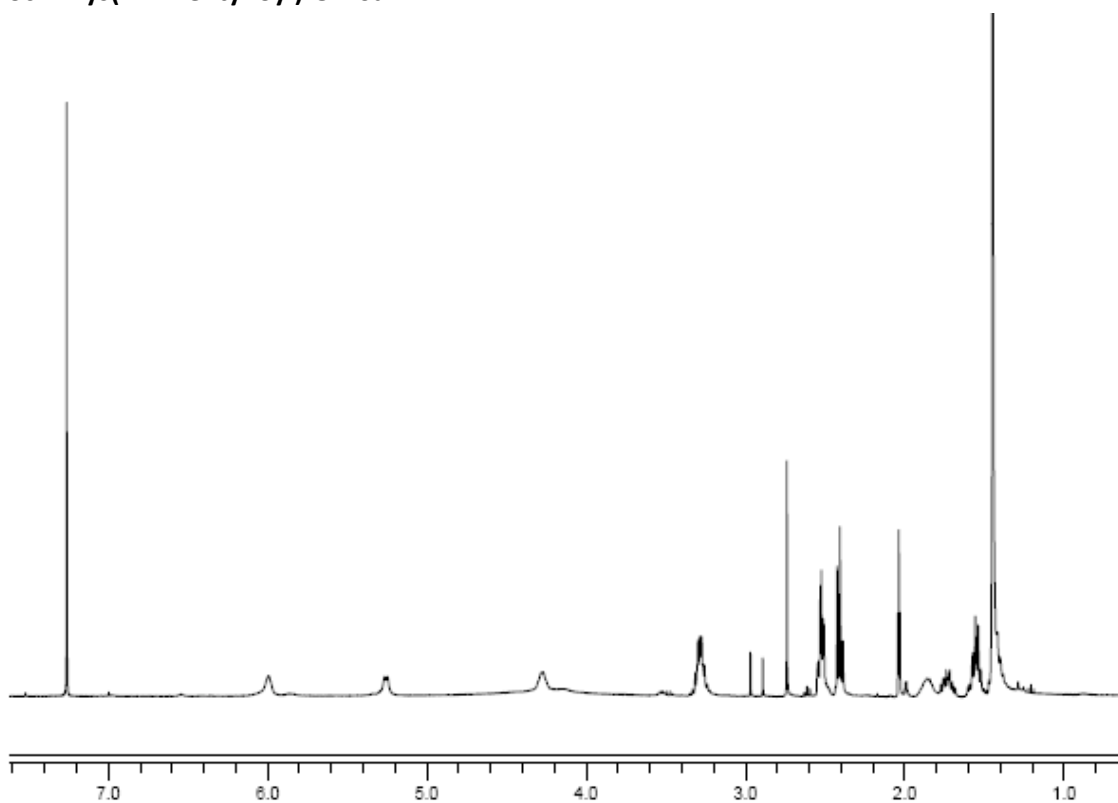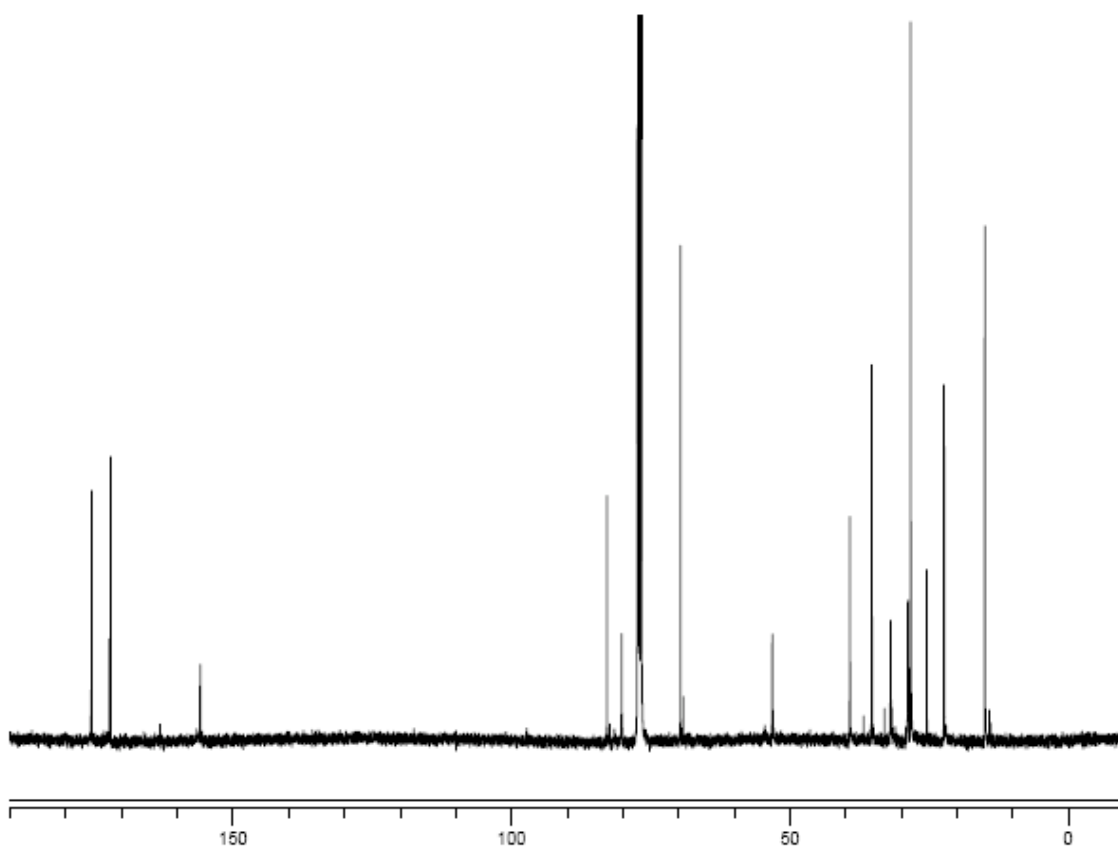

**Boc-L-4-amino-phenylalanine(N-4-pentynoyl)-OH 6c.**

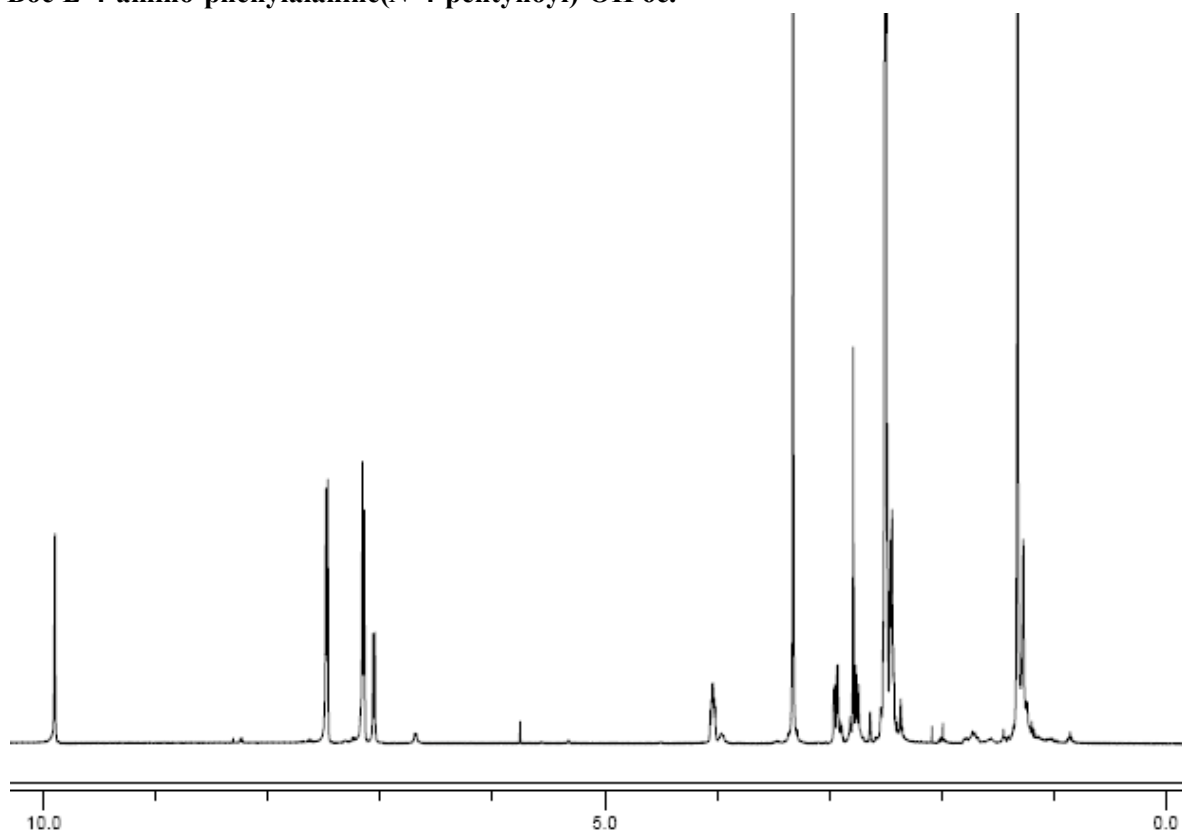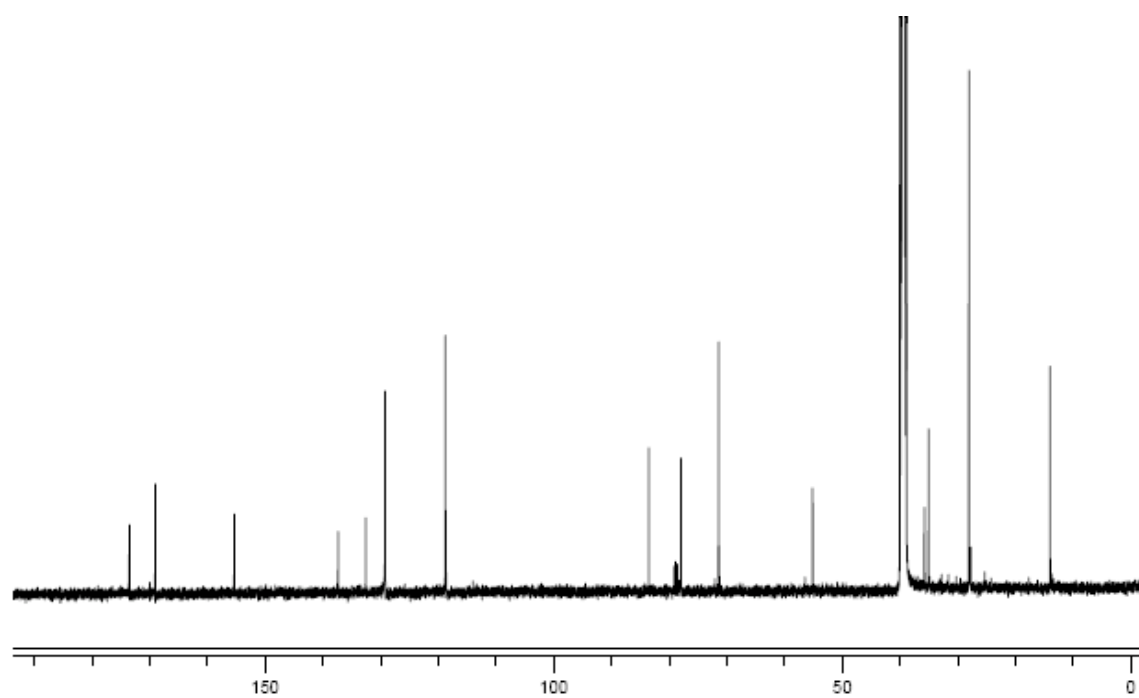

Linear peptidomimetic 7a (1*S*,2*S*,3*S*).

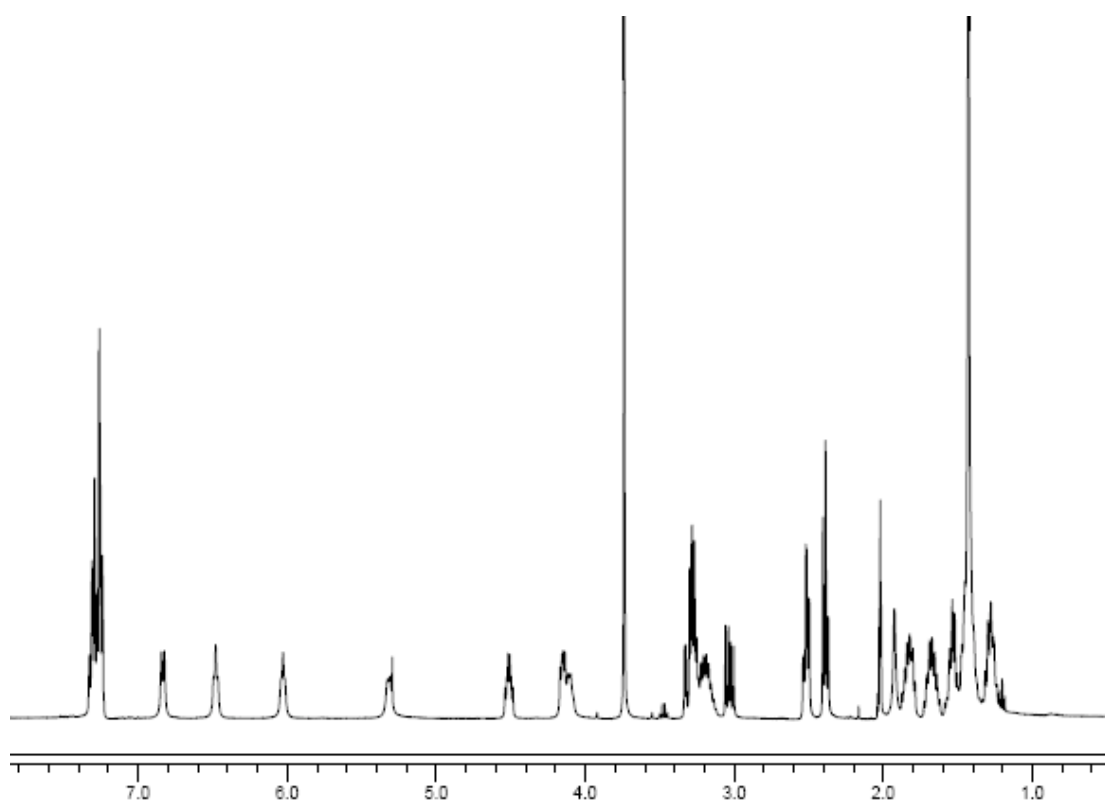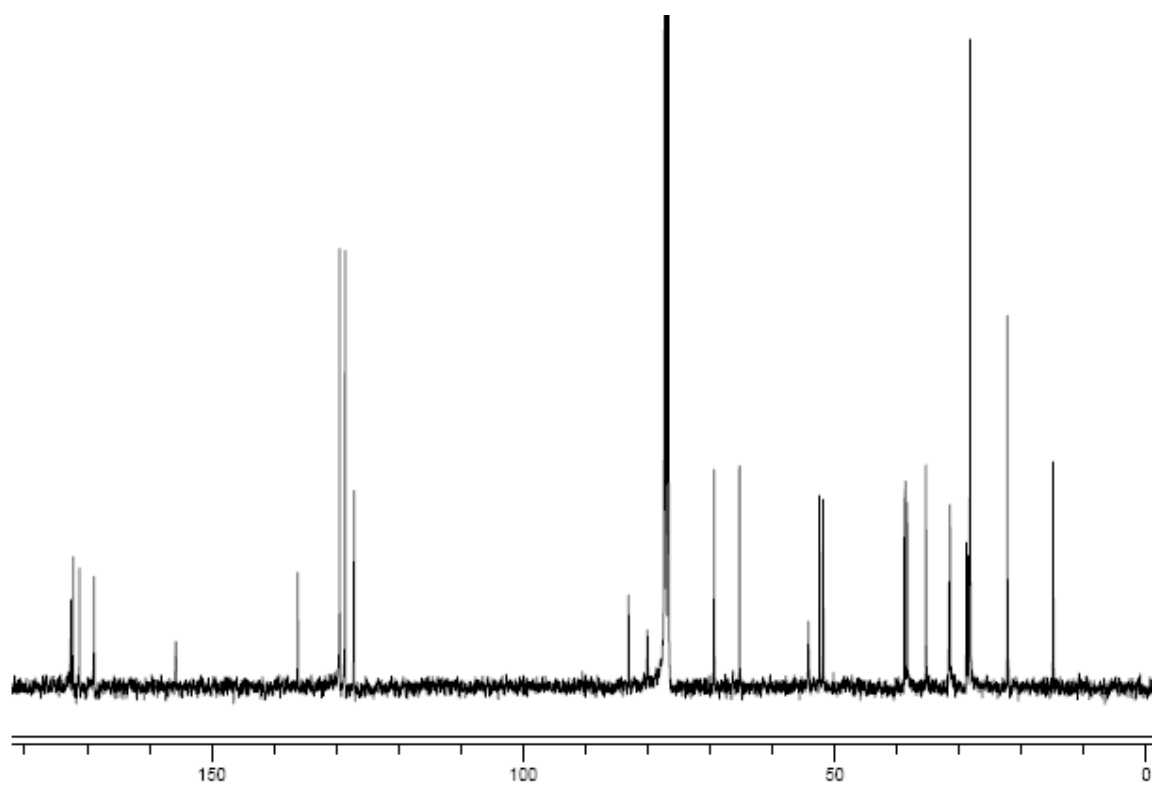

Linear peptidomimetic 7b (1*S*,2*R*,3*S*).

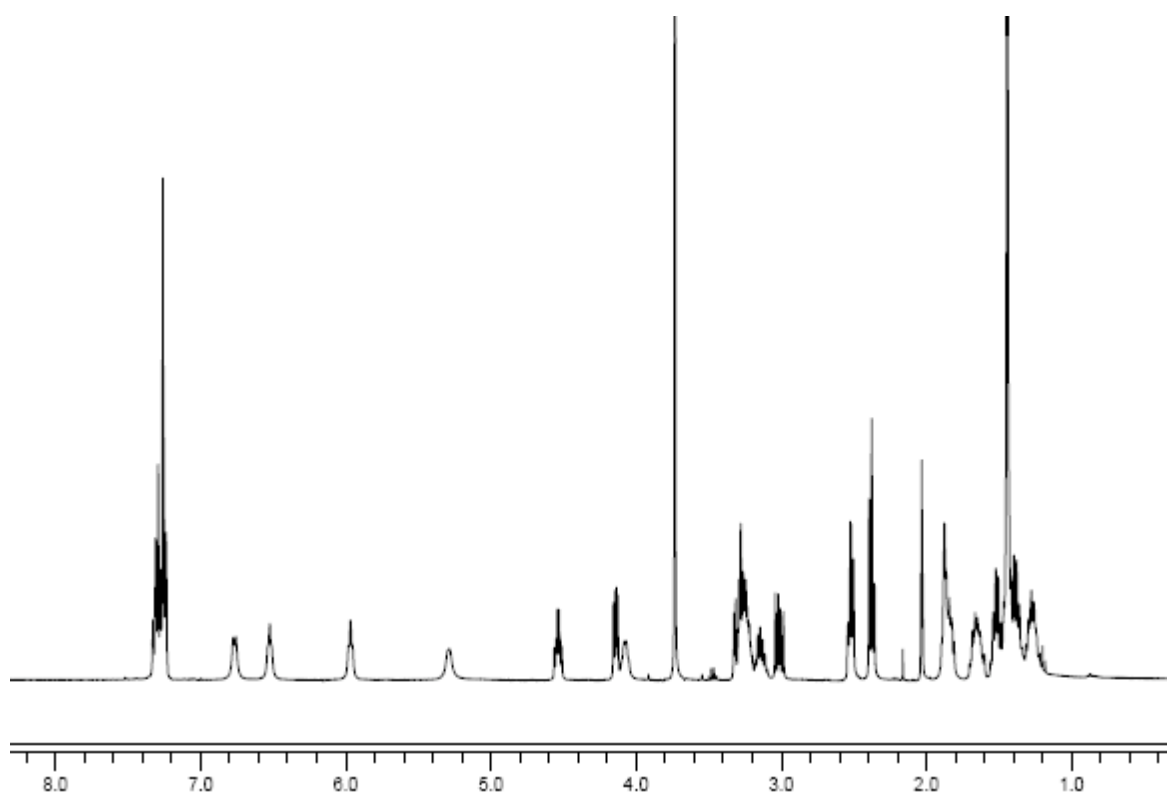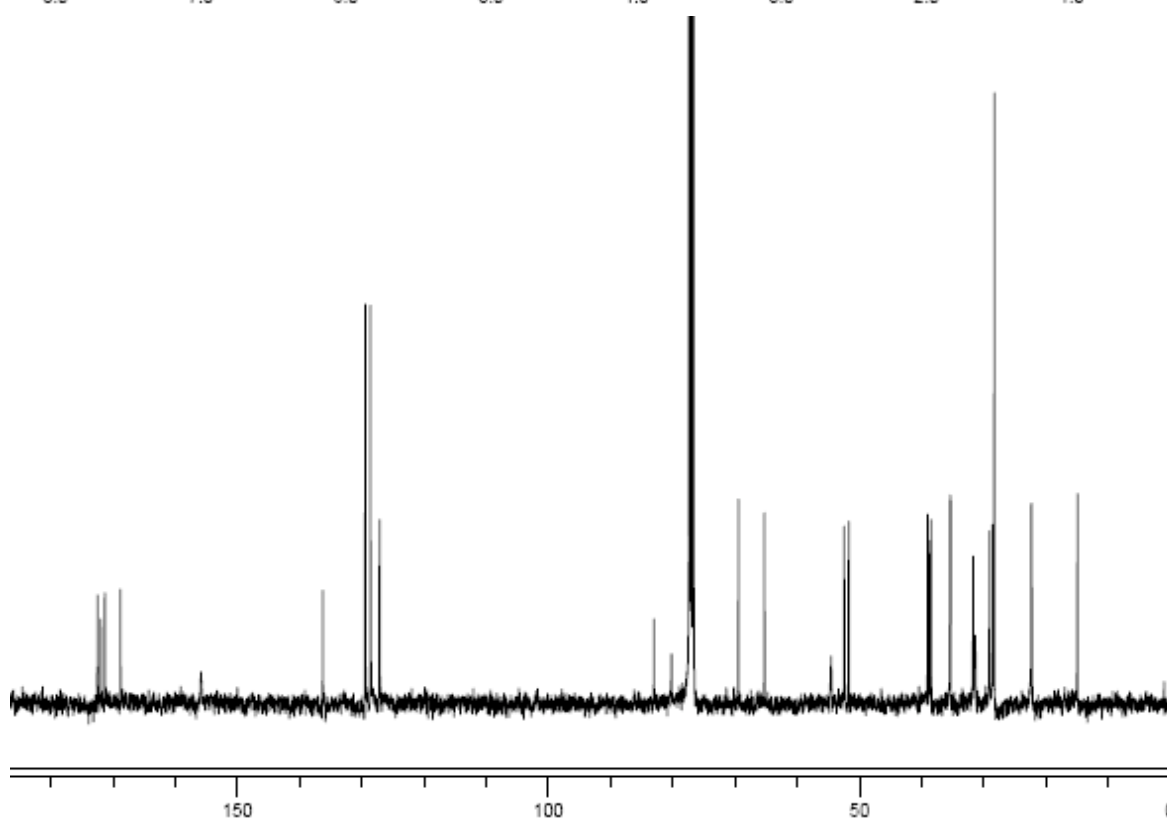



Linear peptidomimetic 7c (1S,2S,3R).

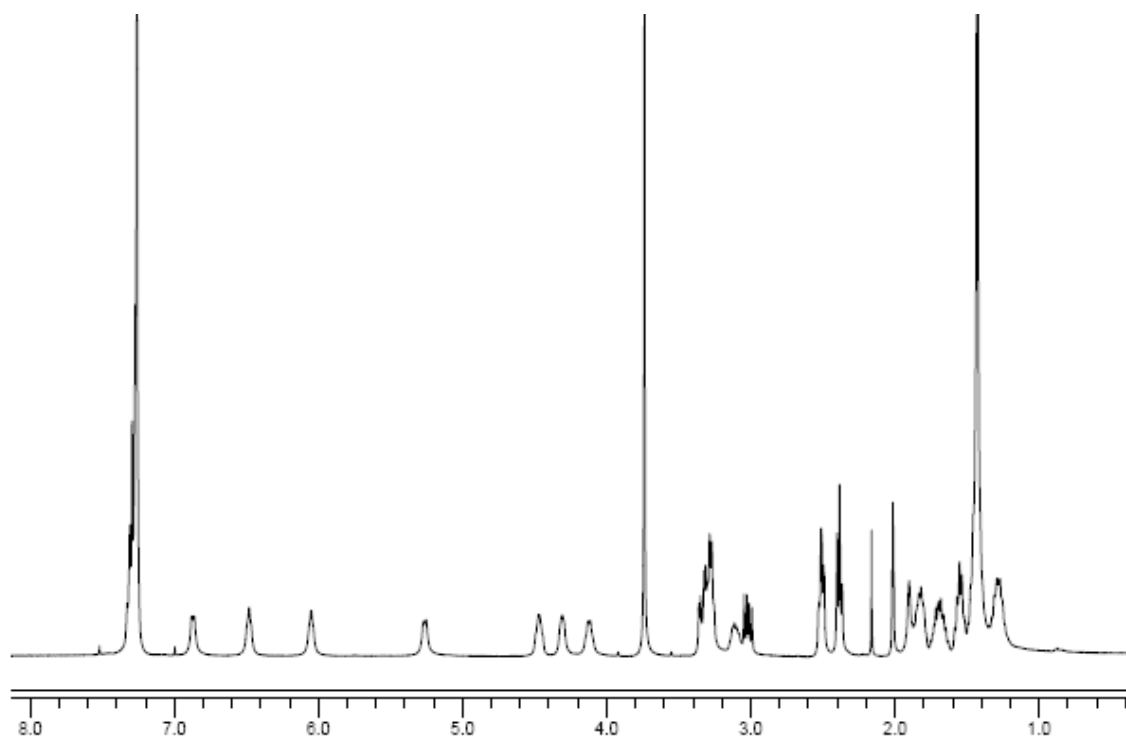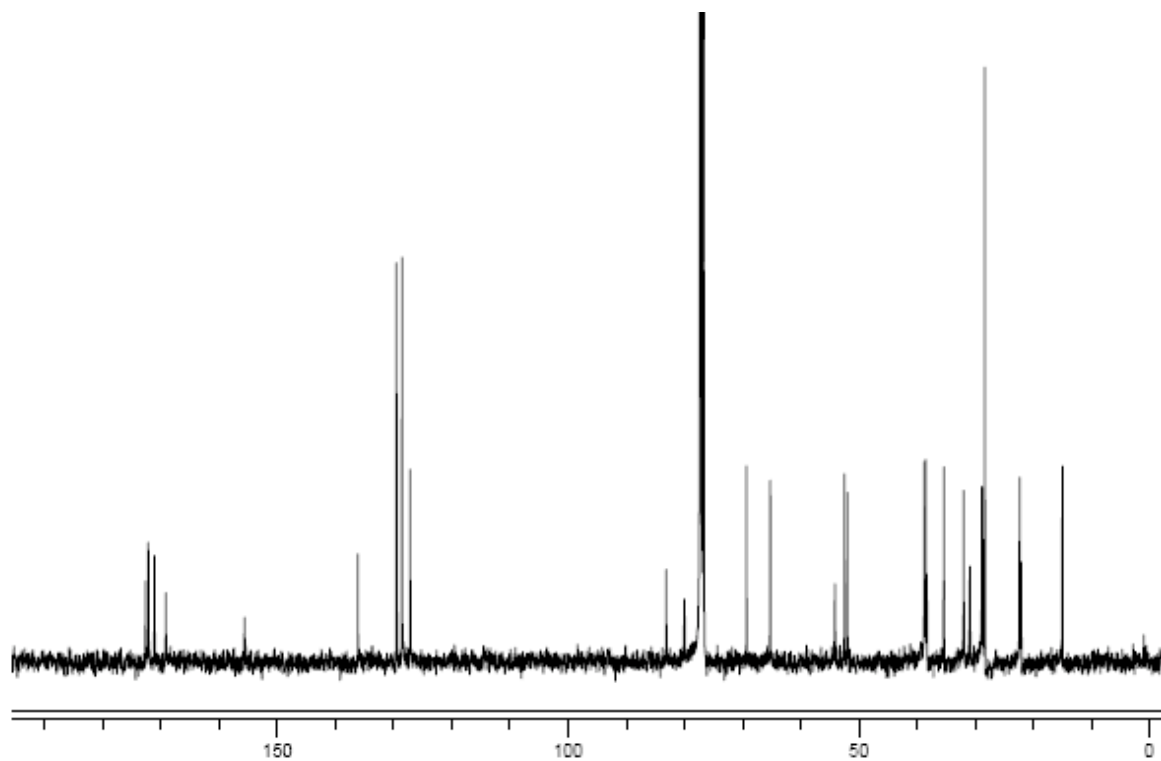

Macrocyclic peptidomimetic 8a (1*S*,2*S*,3*S*-1,4-triazole).

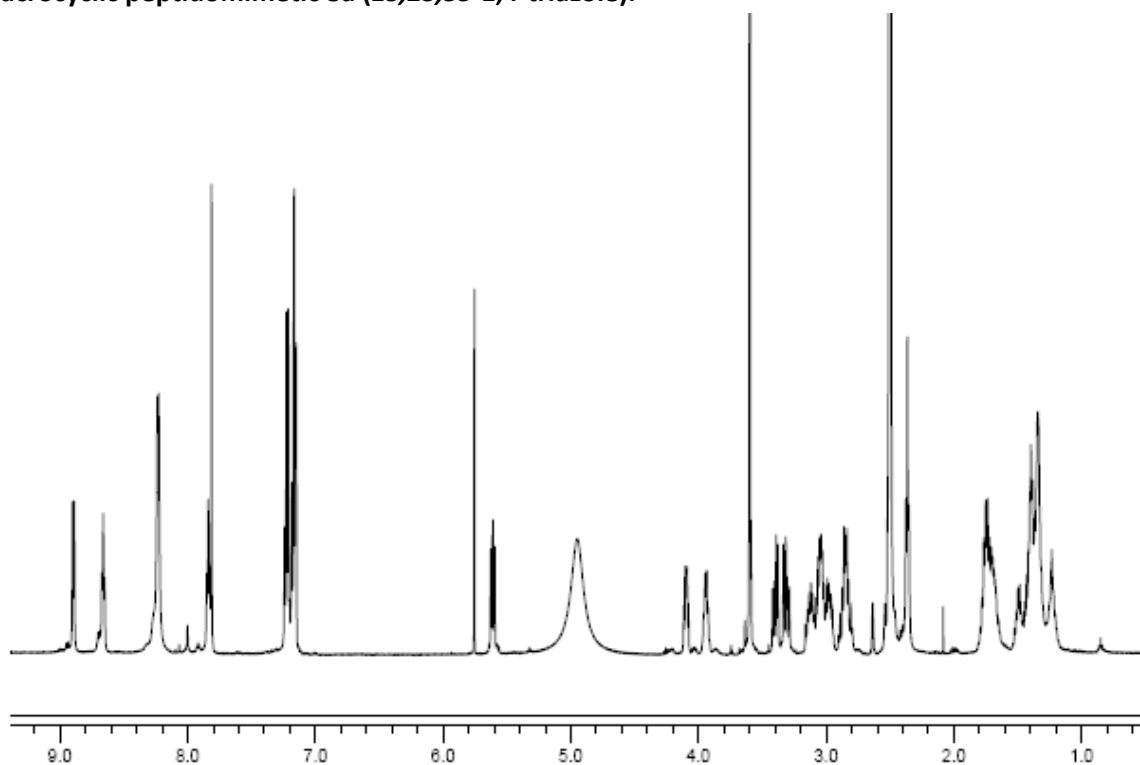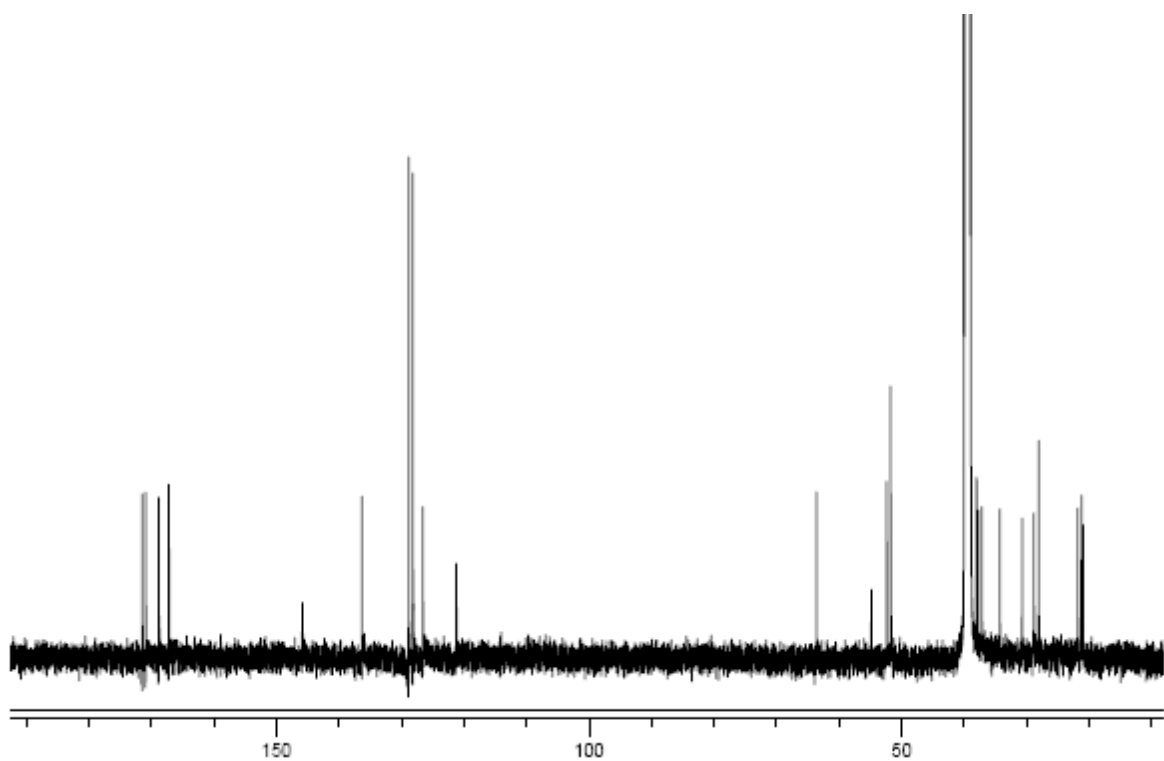

**Macrocyclic peptidomimetic 8b (1*S*,2*R*,3*S*-1,4-triazole).**

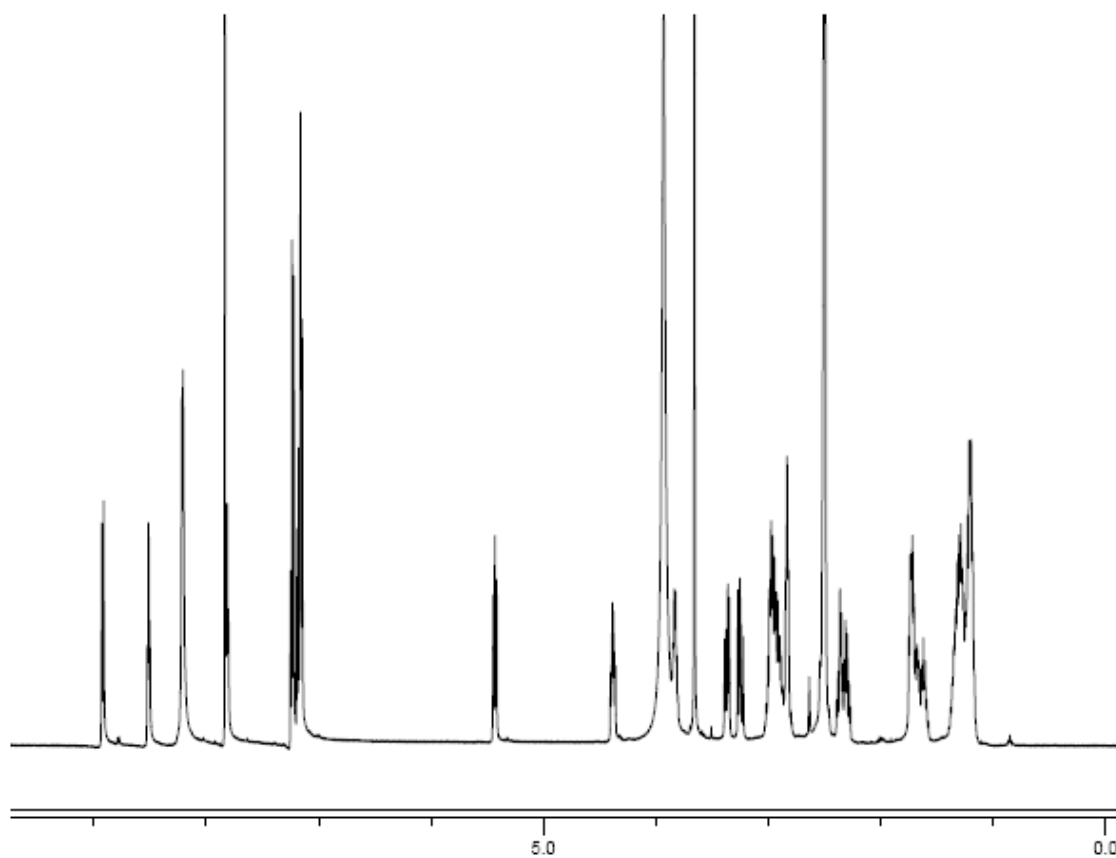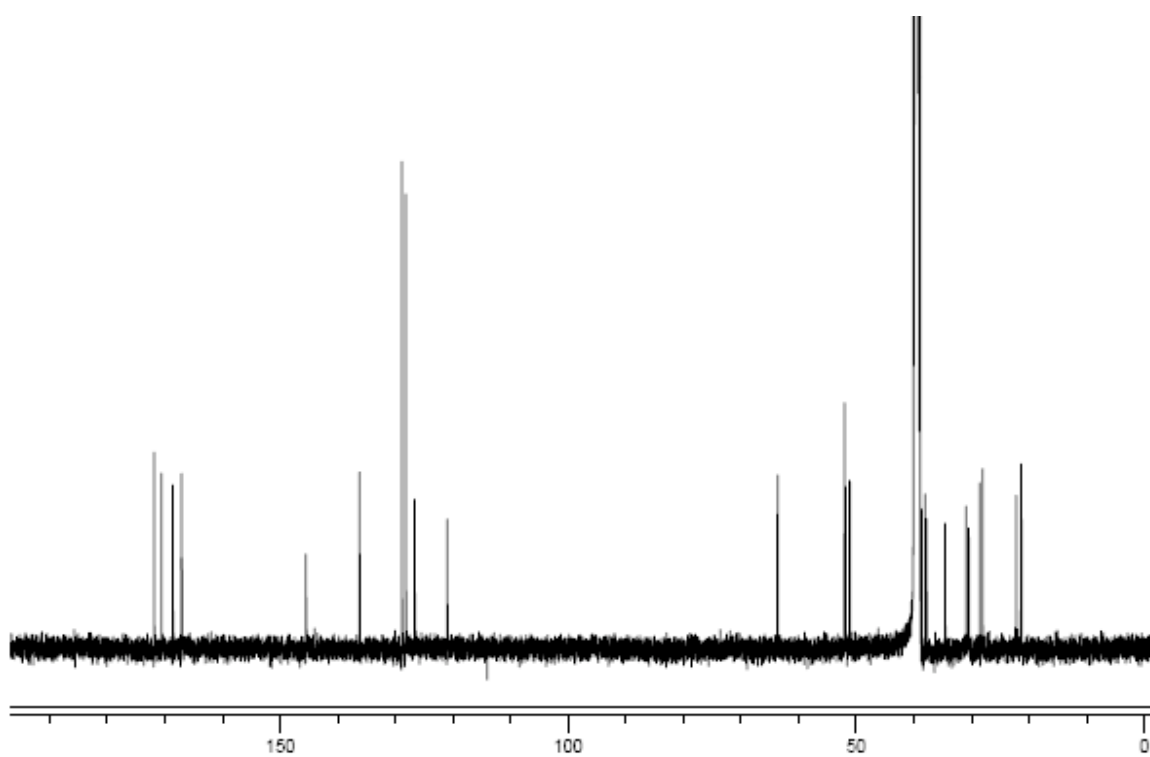

Macrocyclic peptidomimetic 8c (1*S*,2*S*,3*R*-1,4-triazole).

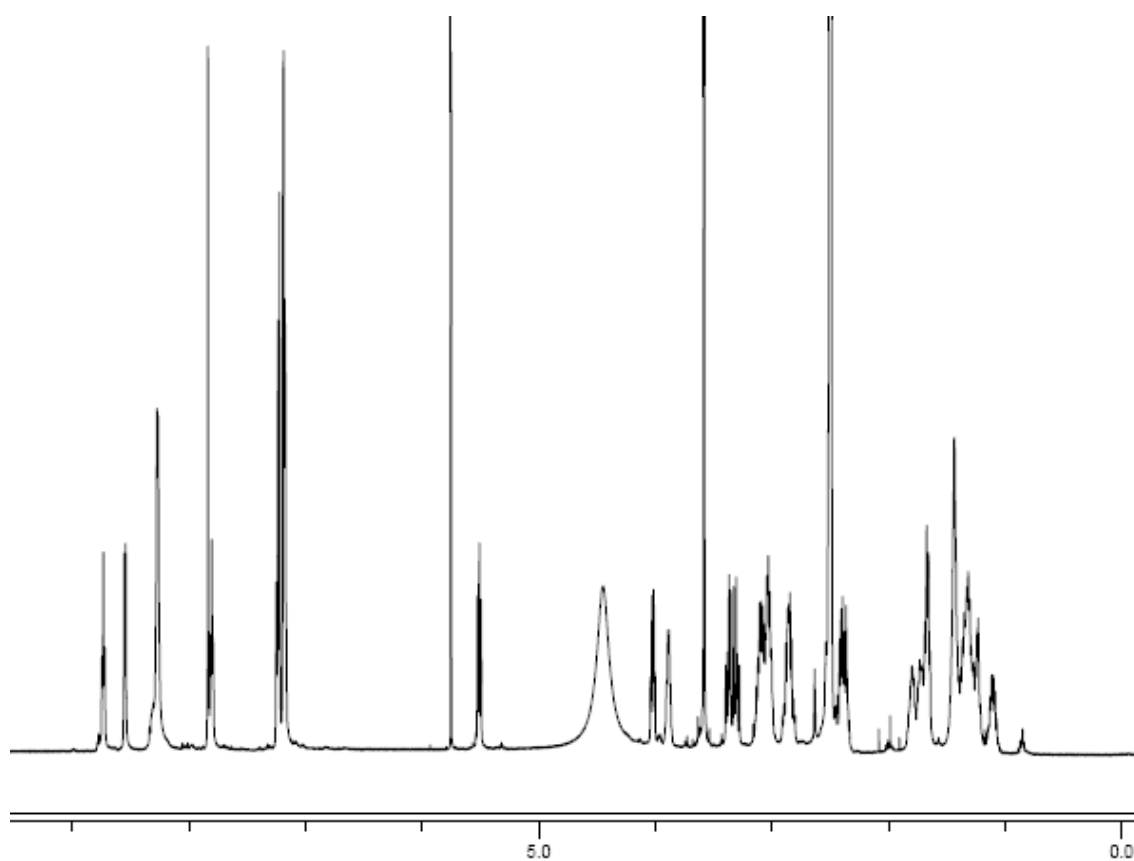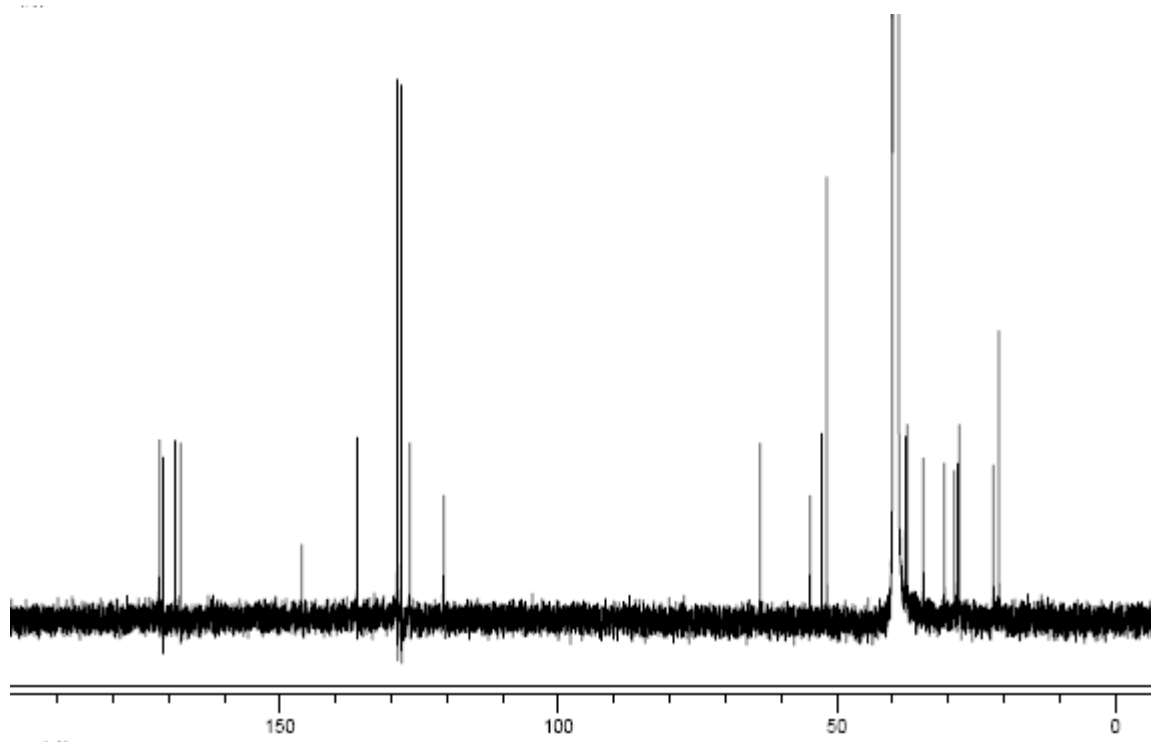

Macrocyclic peptidomimetic 9a (1*S*,2*S*,3*S*-1,5-triazole).

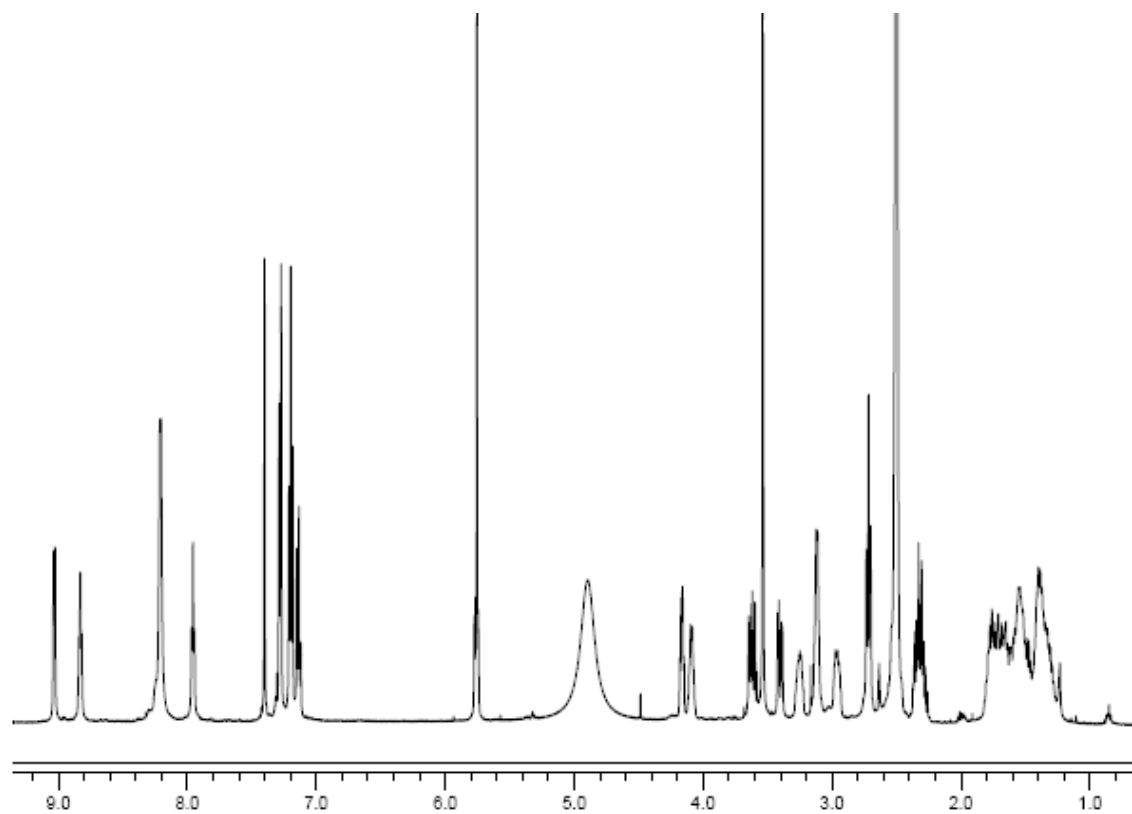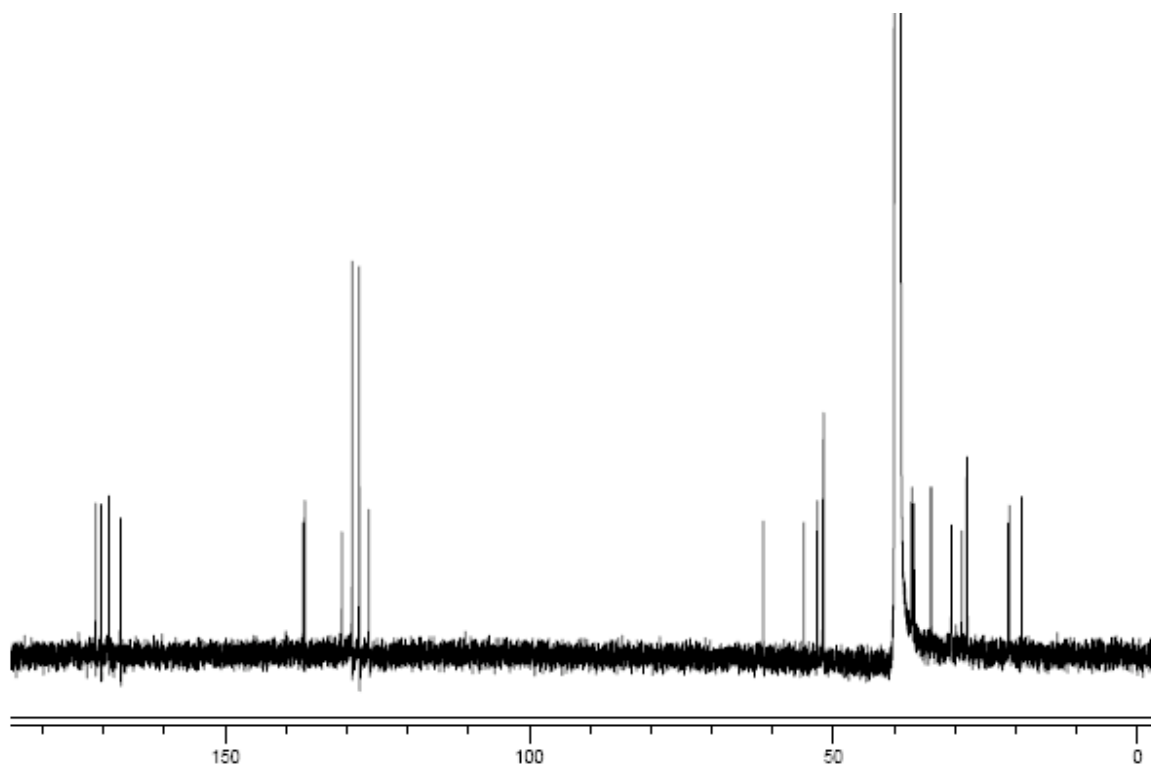

Macrocyclic peptidomimetic 9b (1*S*,2*R*,3*S*-1,5-triazole).

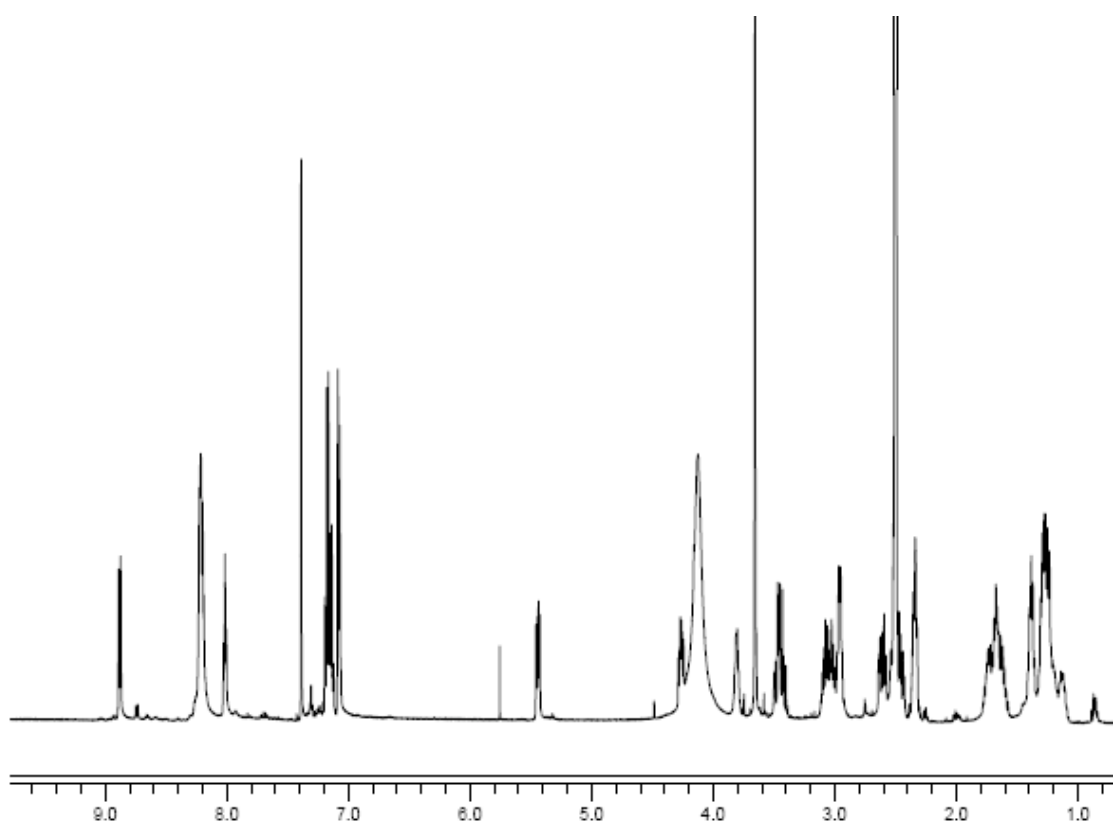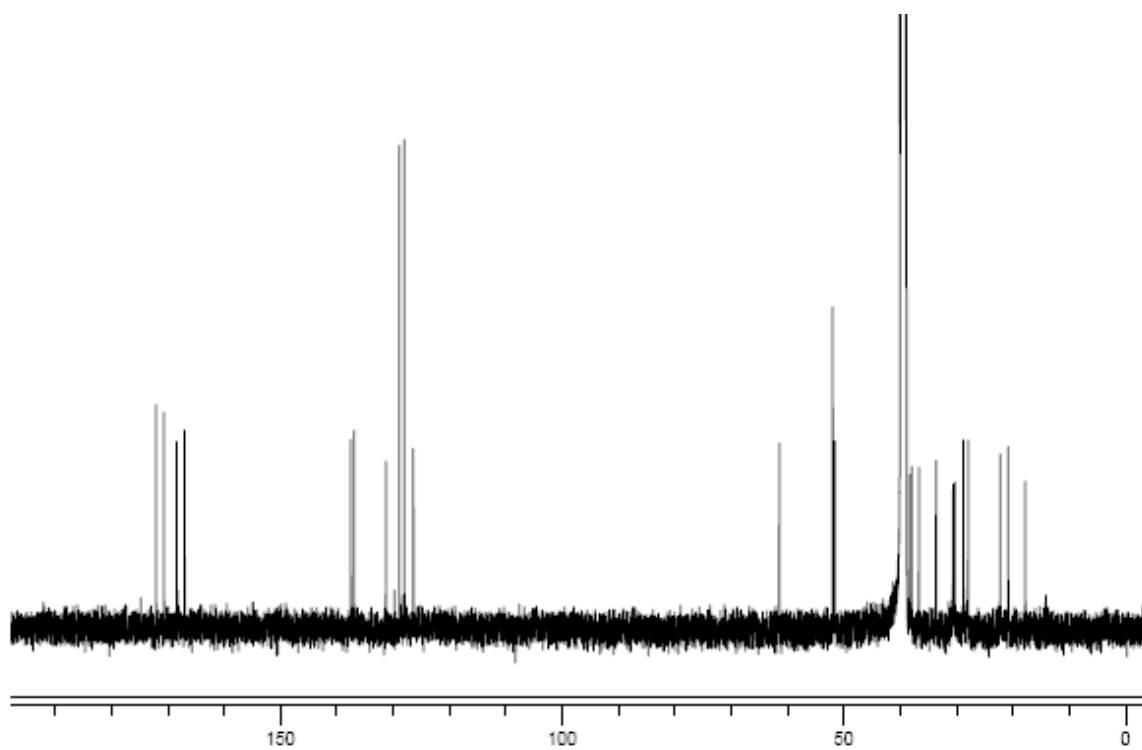

Macrocyclic peptidomimetic 9c (1*S*,2*S*,3*R*-1,5-triazole).

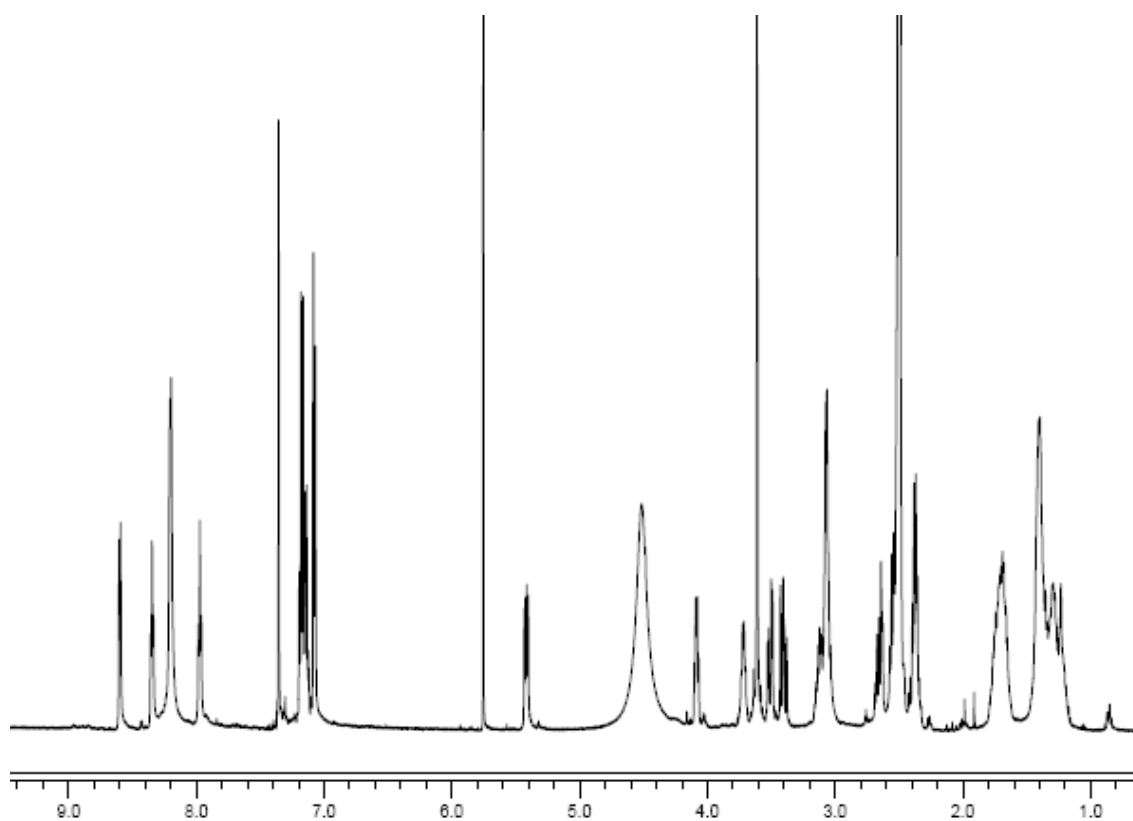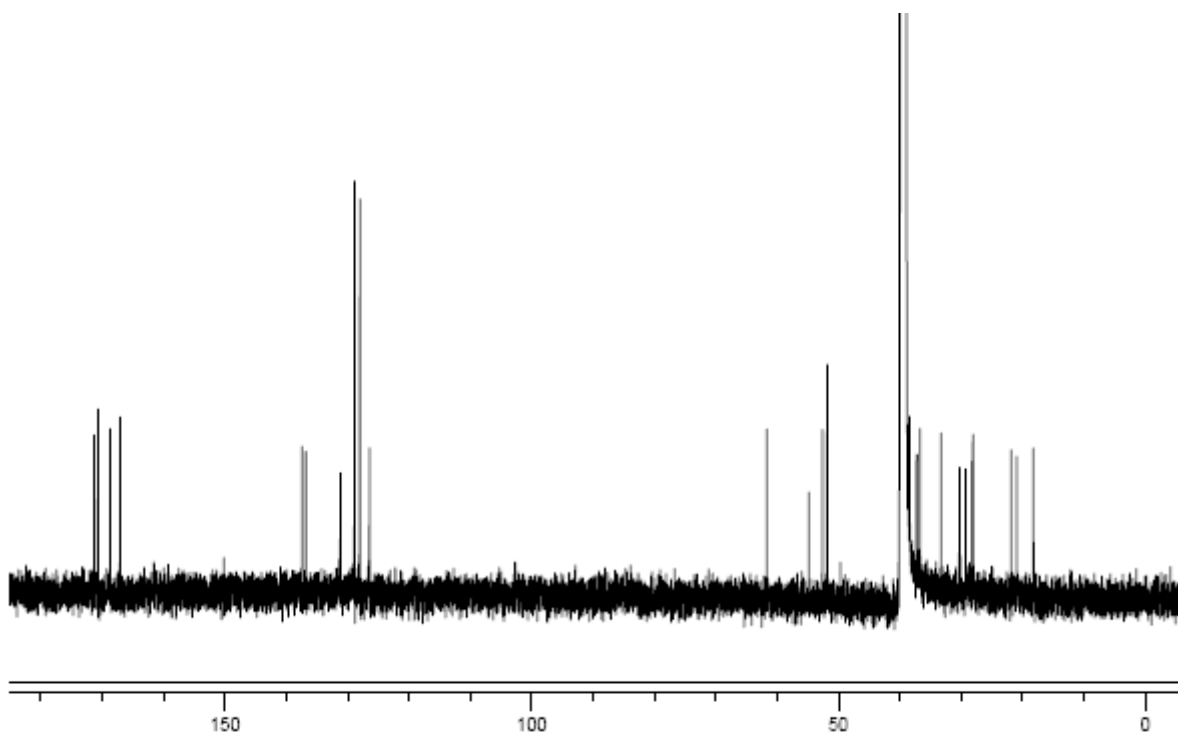

**Macrocyclic Diketopiperazine 10a (1*S*,2*S*,3*S*-1,4-triazole).**

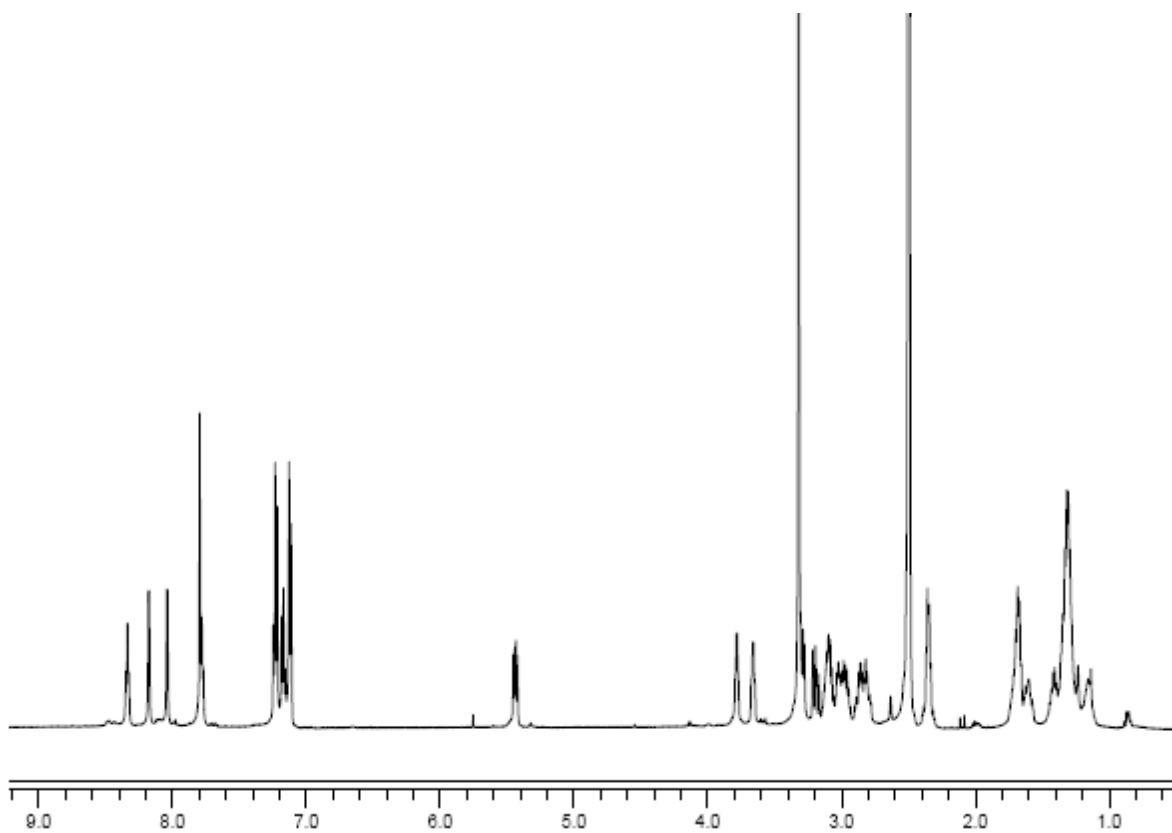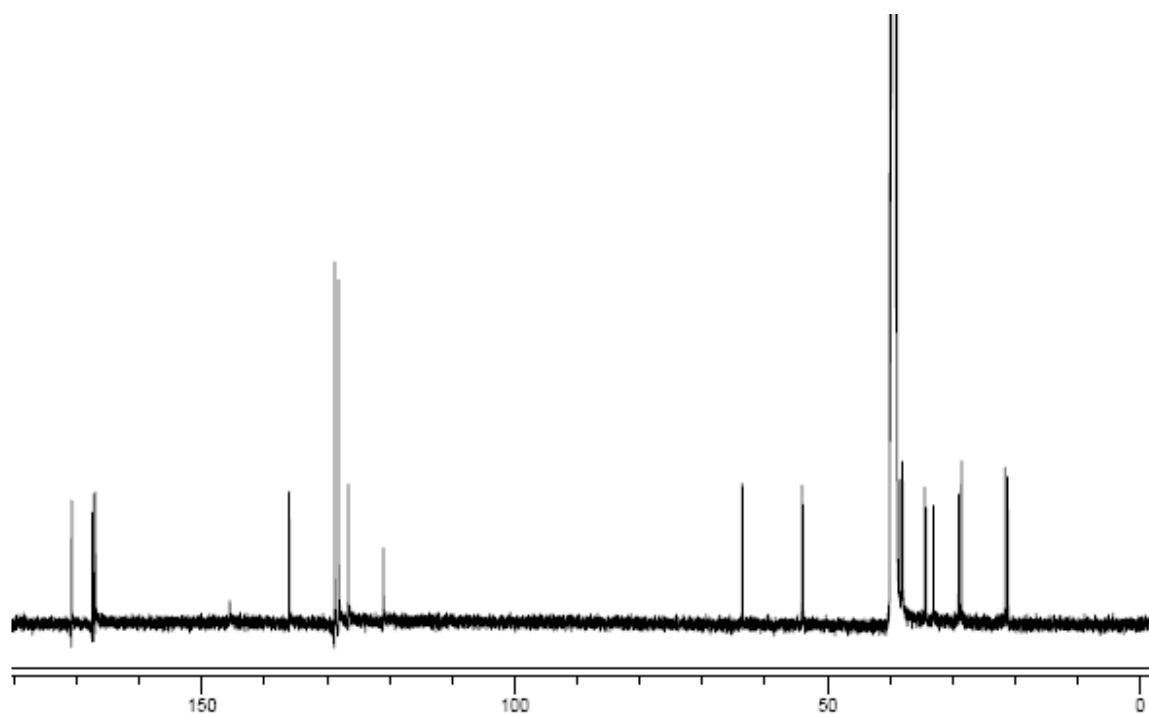



**Macrocyclic Diketopiperazine 10b (1*S*,2*R*,3*S*-1,4-triazole).**

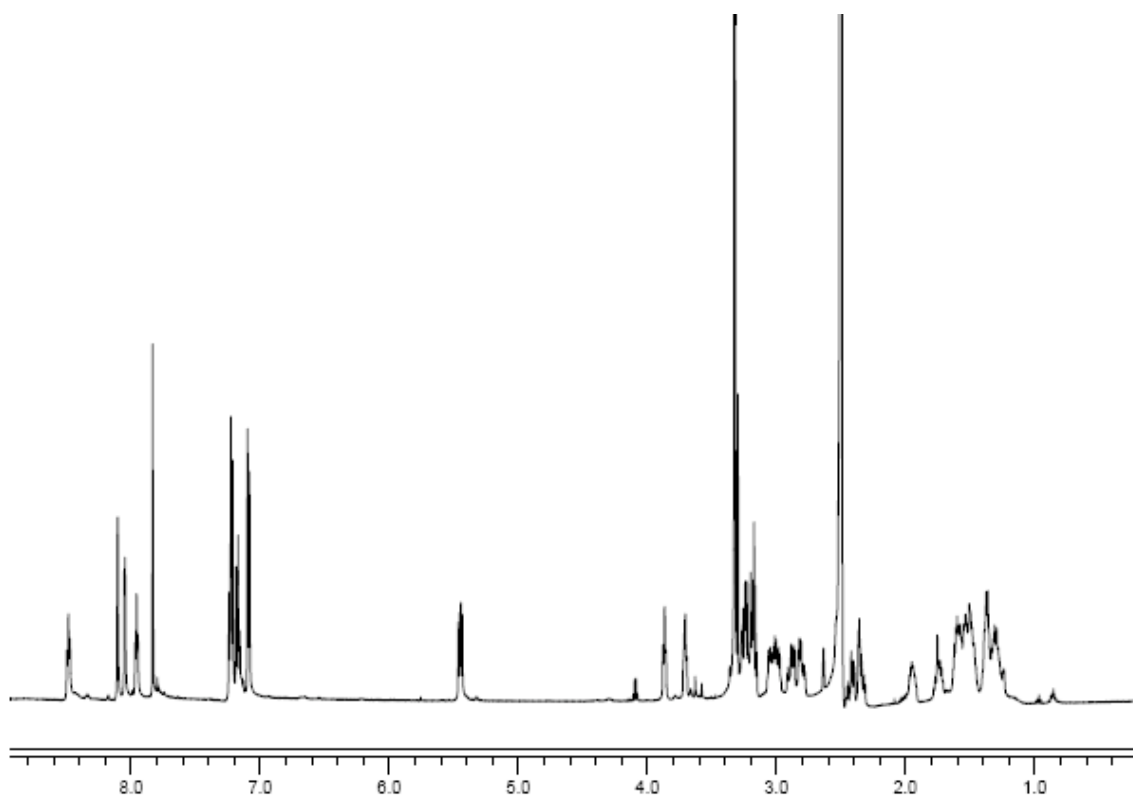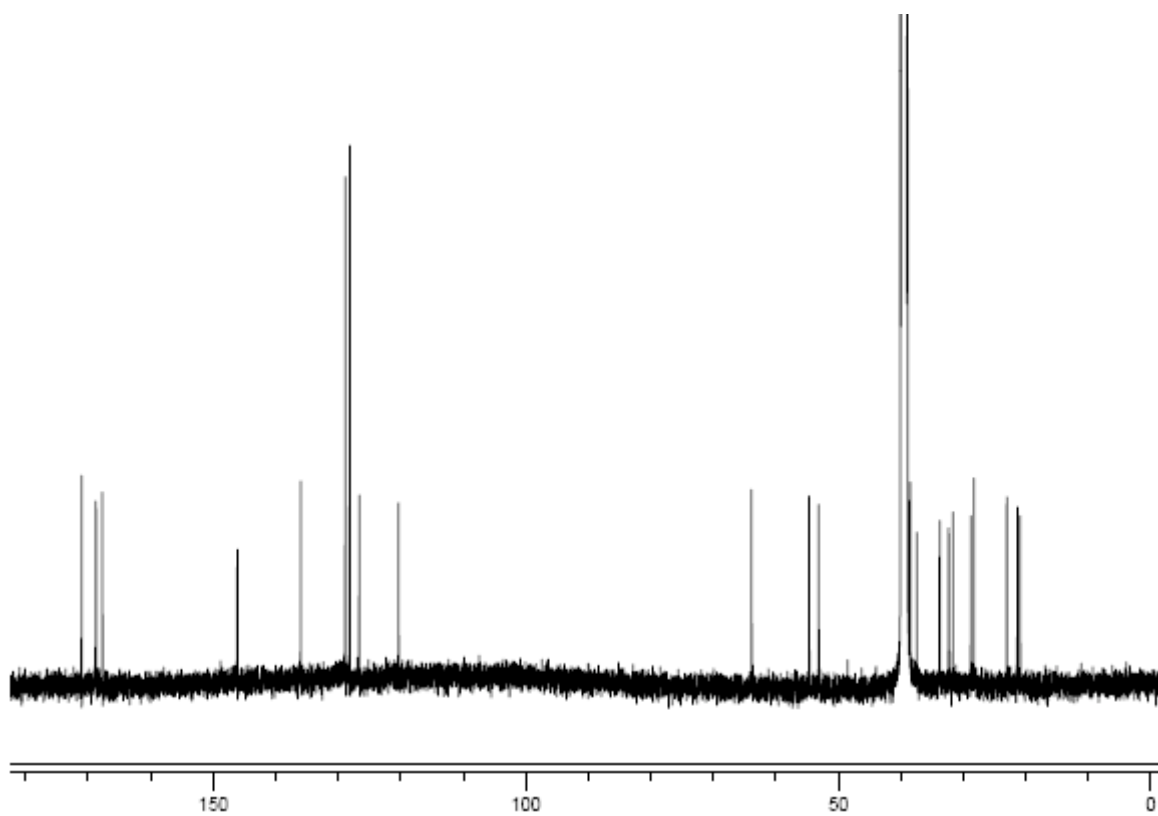

**Macrocyclic Diketopiperazine 10c (1*S*,2*S*,3*R*-1,4-triazole).**

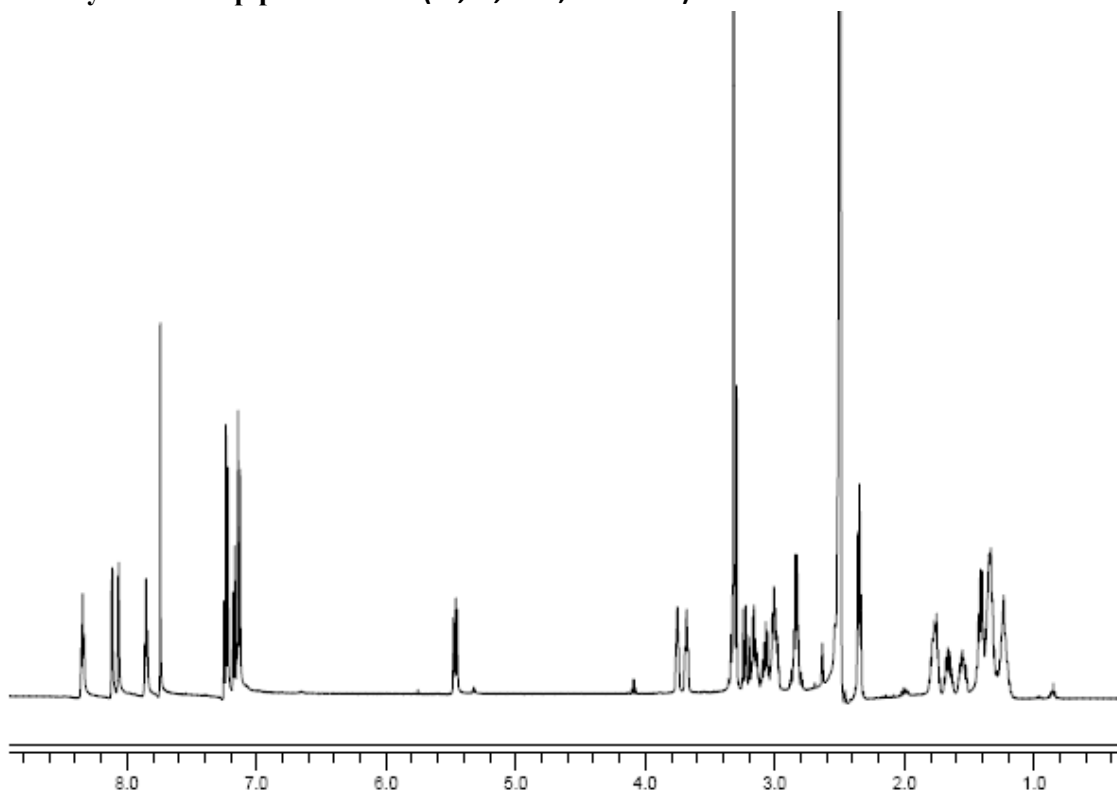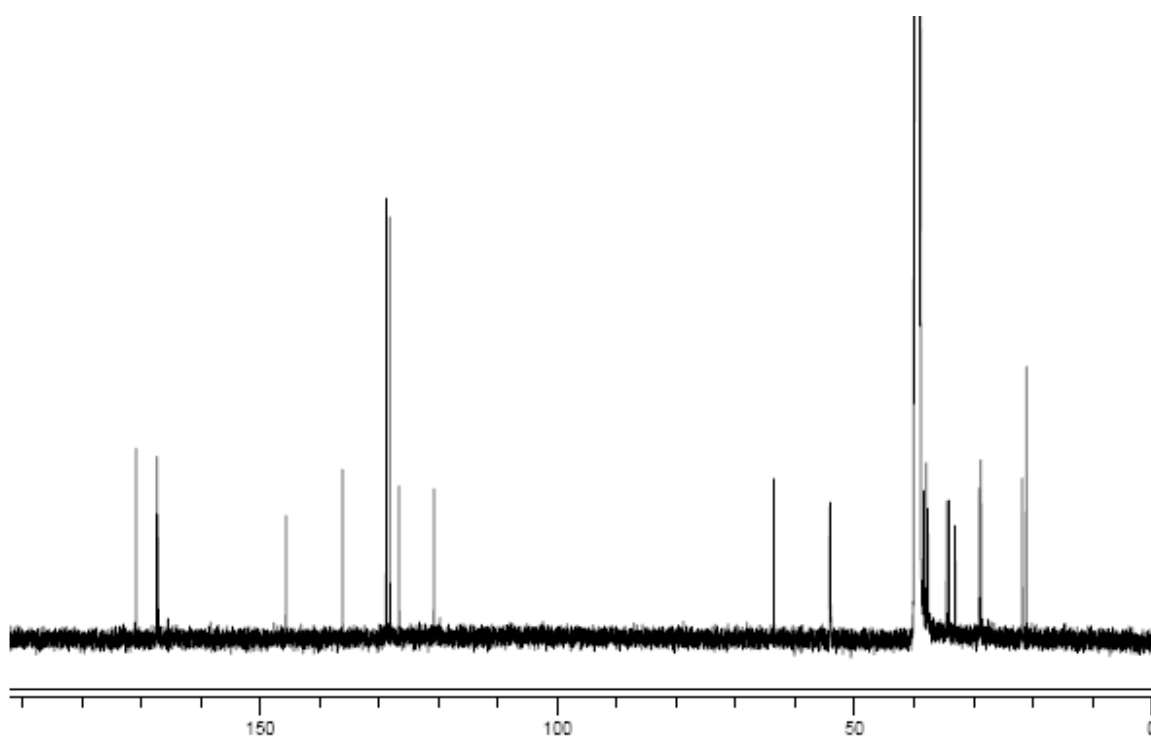

**Macrocyclic Diketopiperazine 11a (1*S*,2*S*,3*S*-1,5-triazole).**

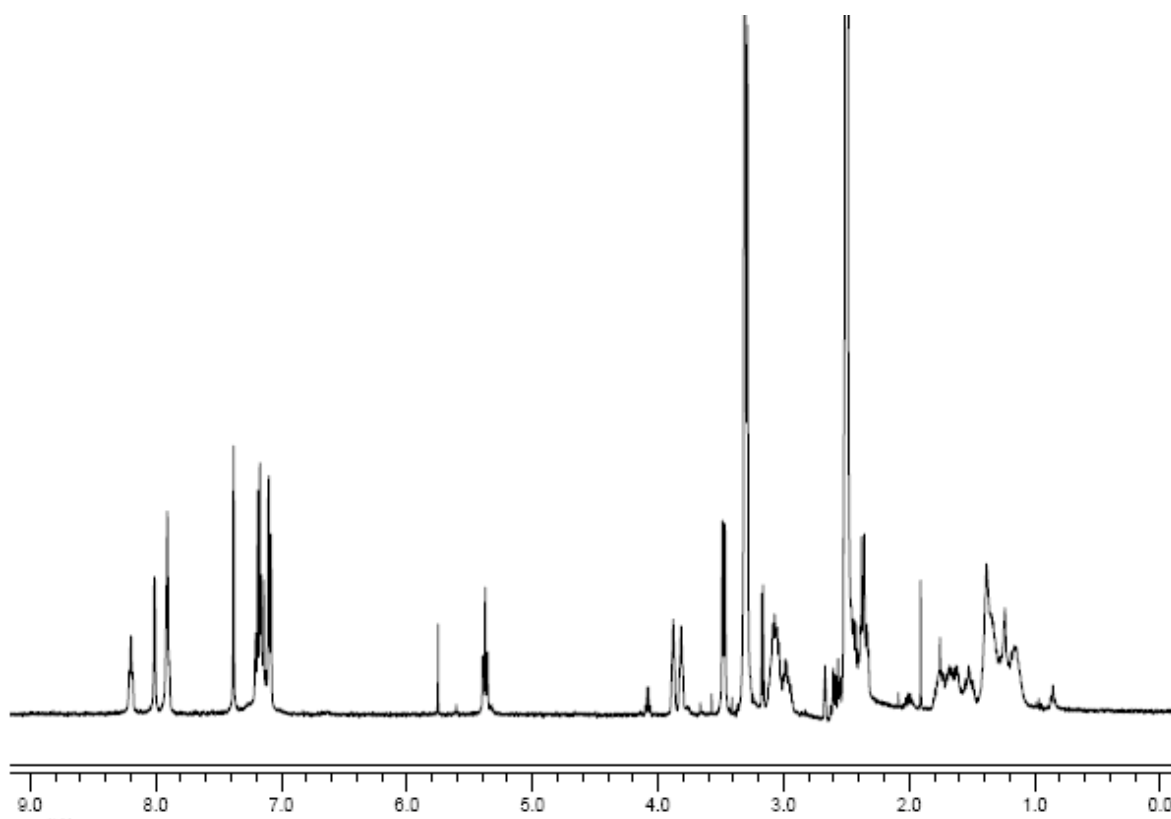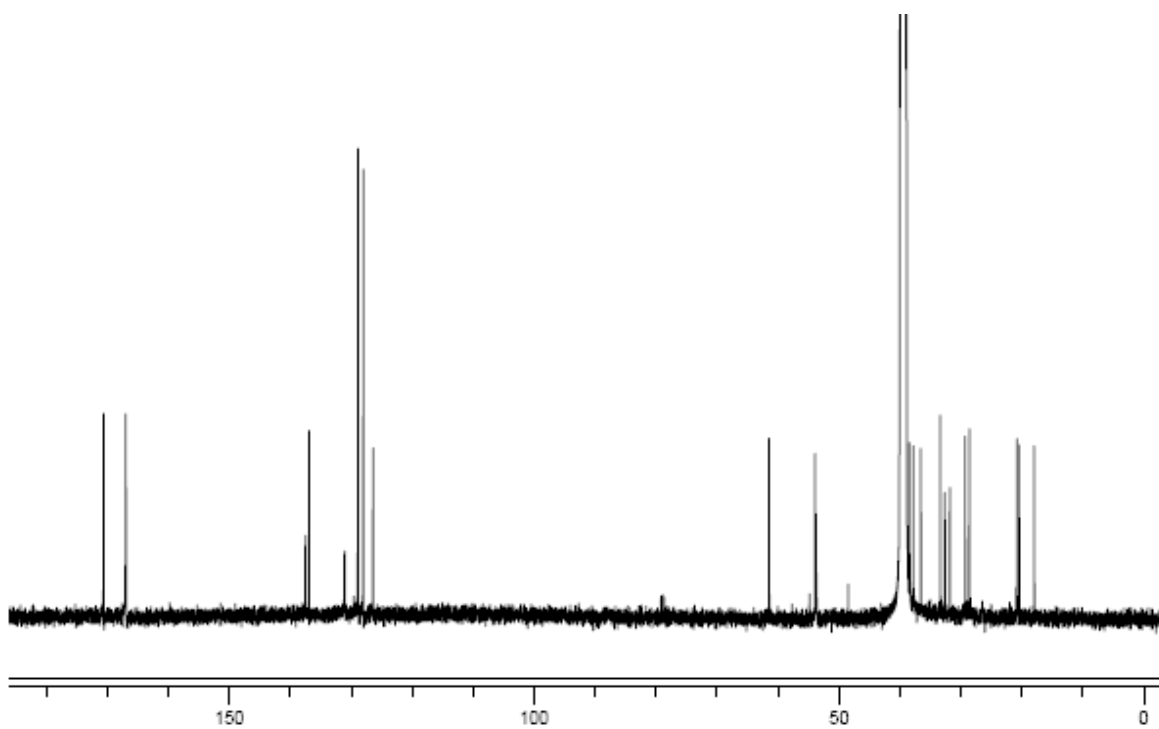

**Macrocyclic Diketopiperazine 11b (1*S*,2*R*,3*S*-1,5-triazole).**

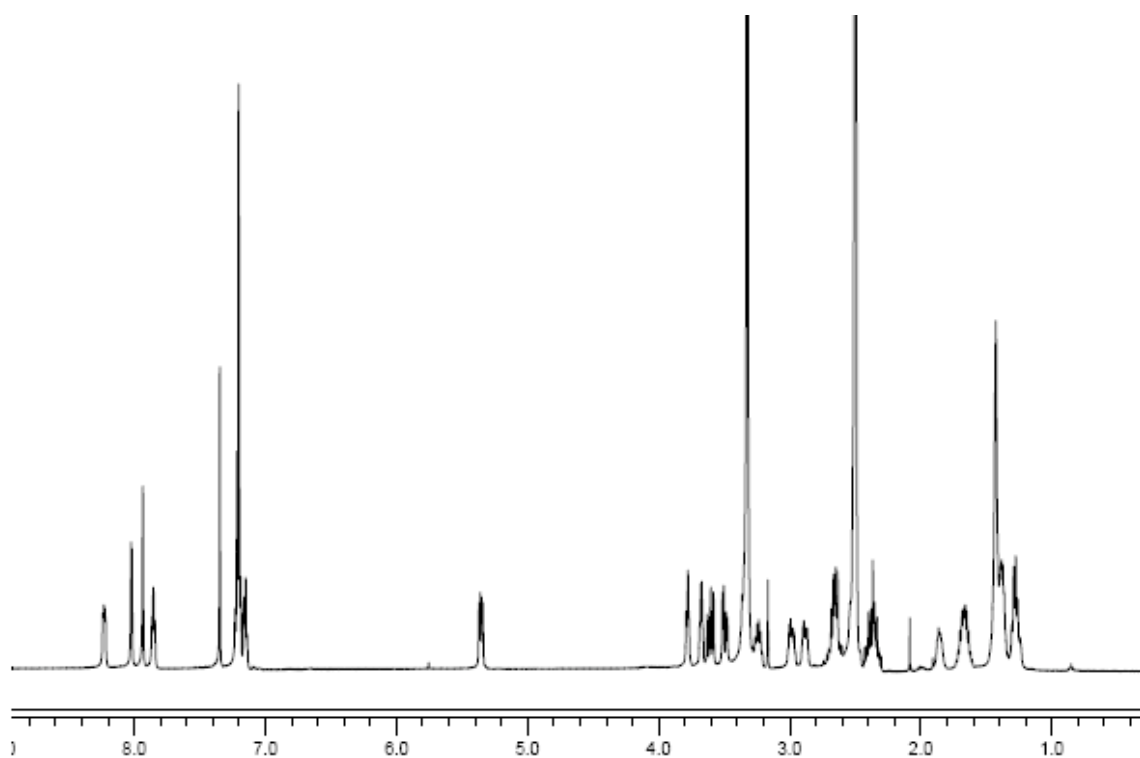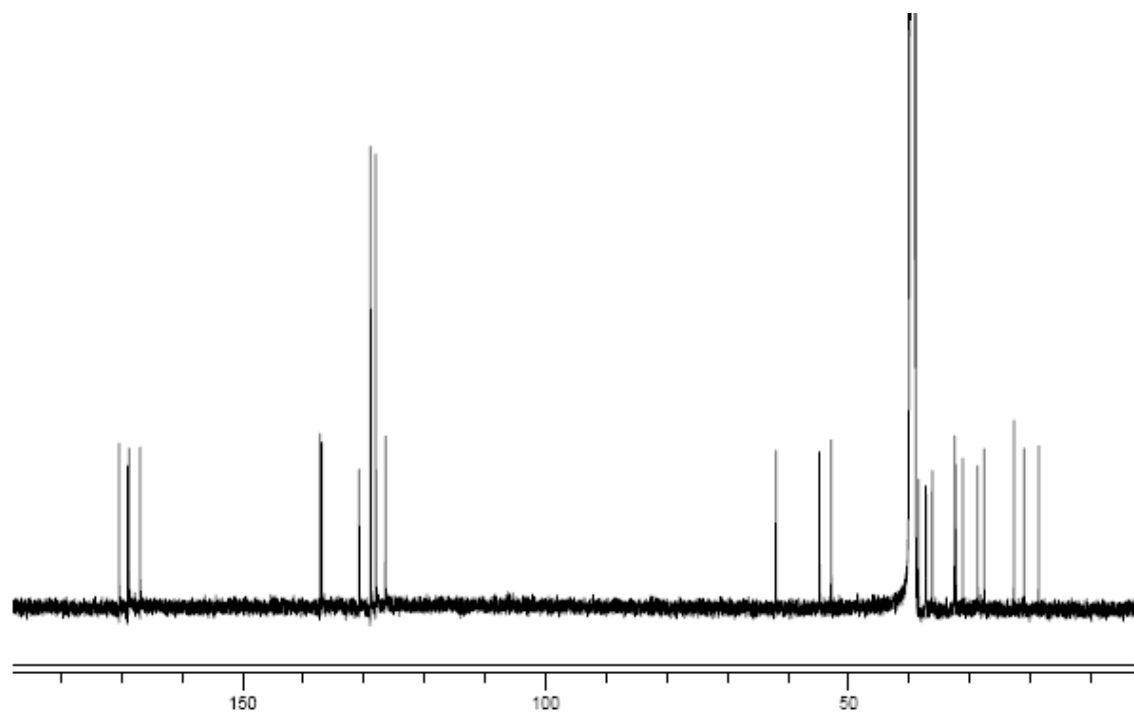

**Macrocyclic Diketopiperazine 11c (1*S*,2*S*,3*R*-1,5-triazole).**

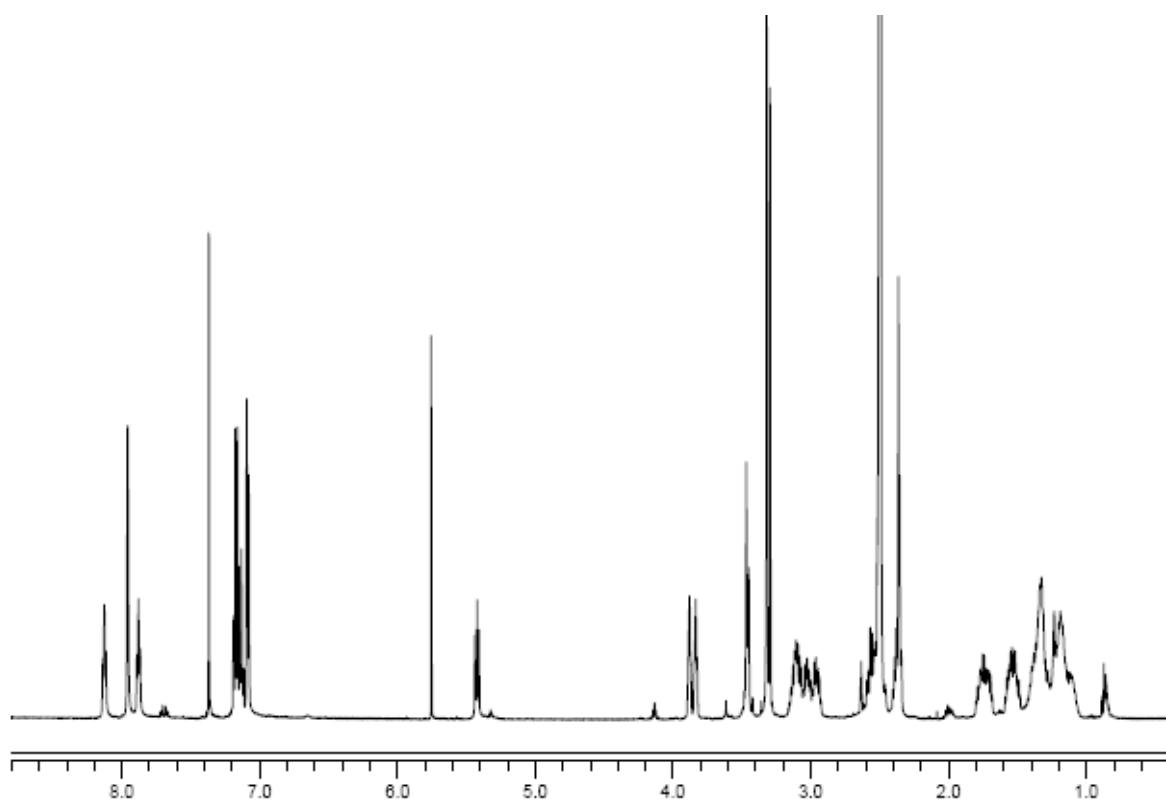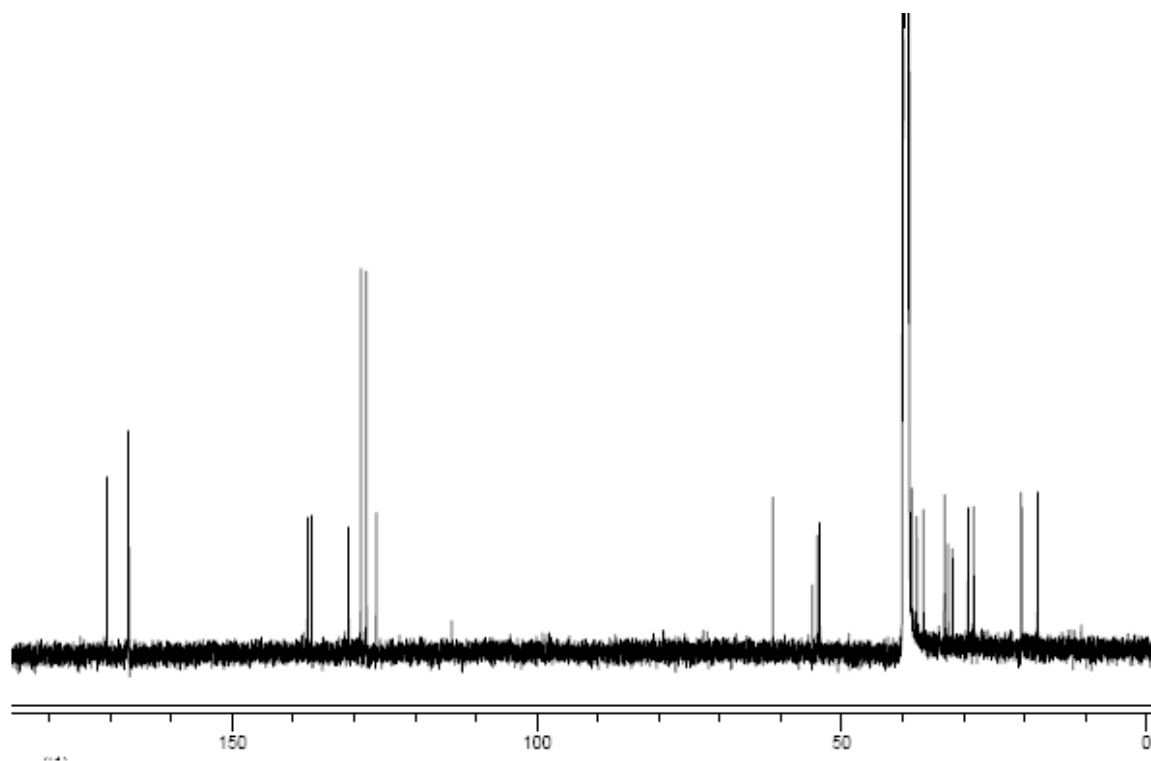

Linear peptidomimetic 12

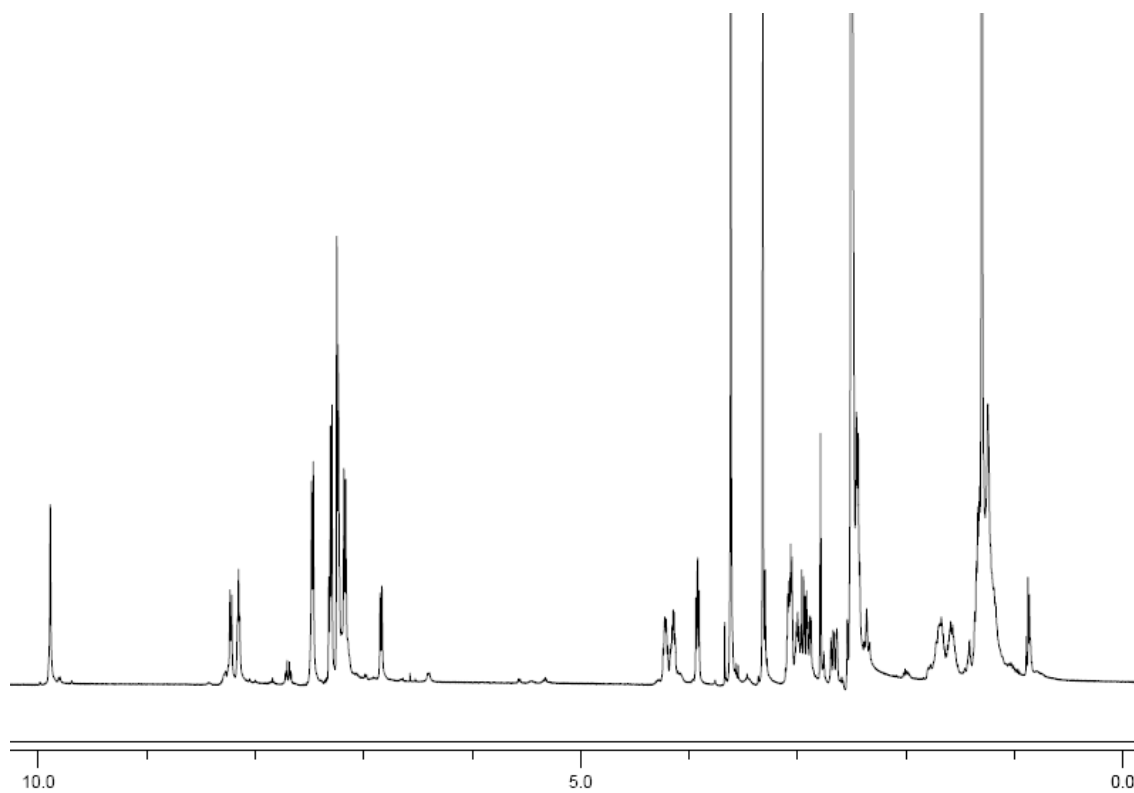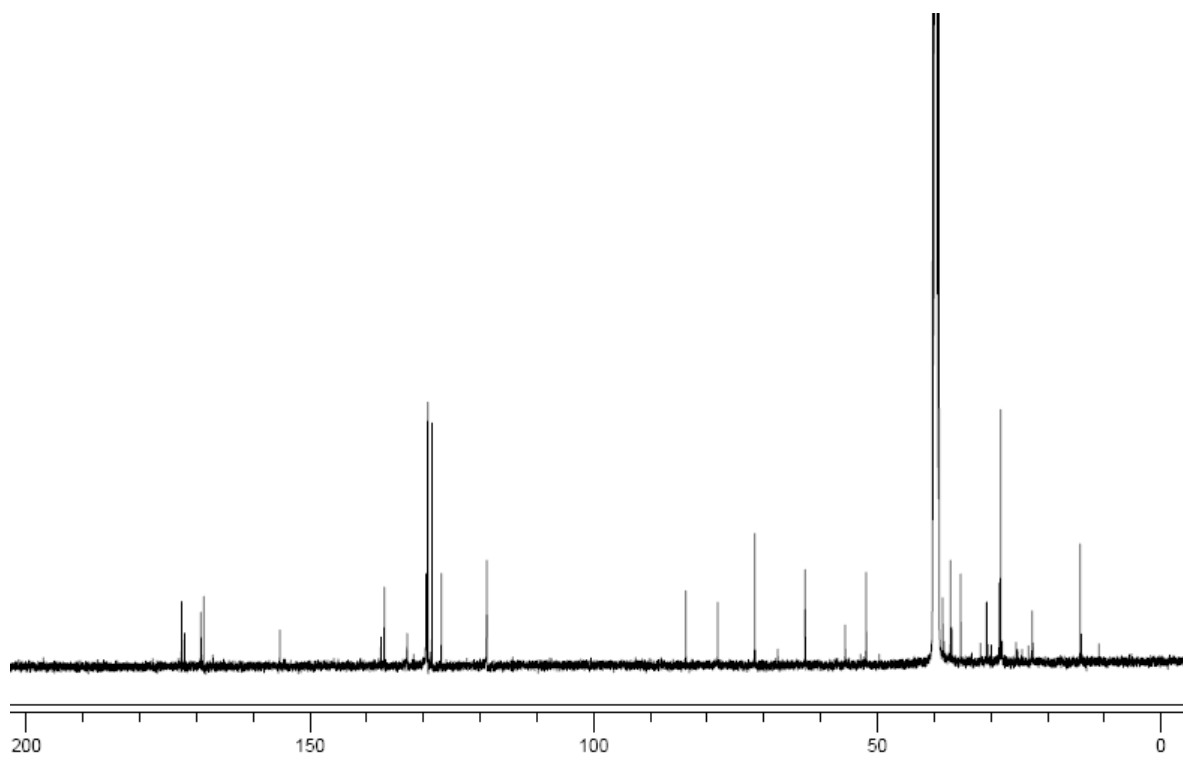

**Macrocyclic peptidomimetic 13.**

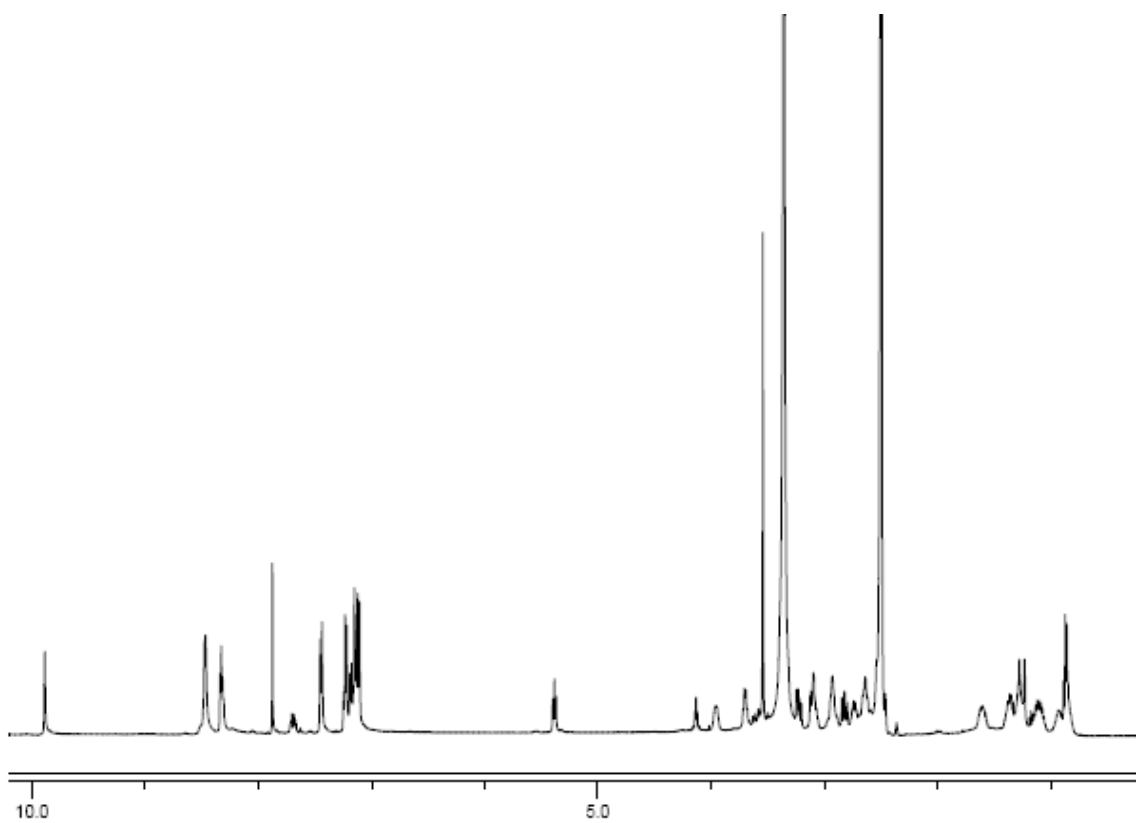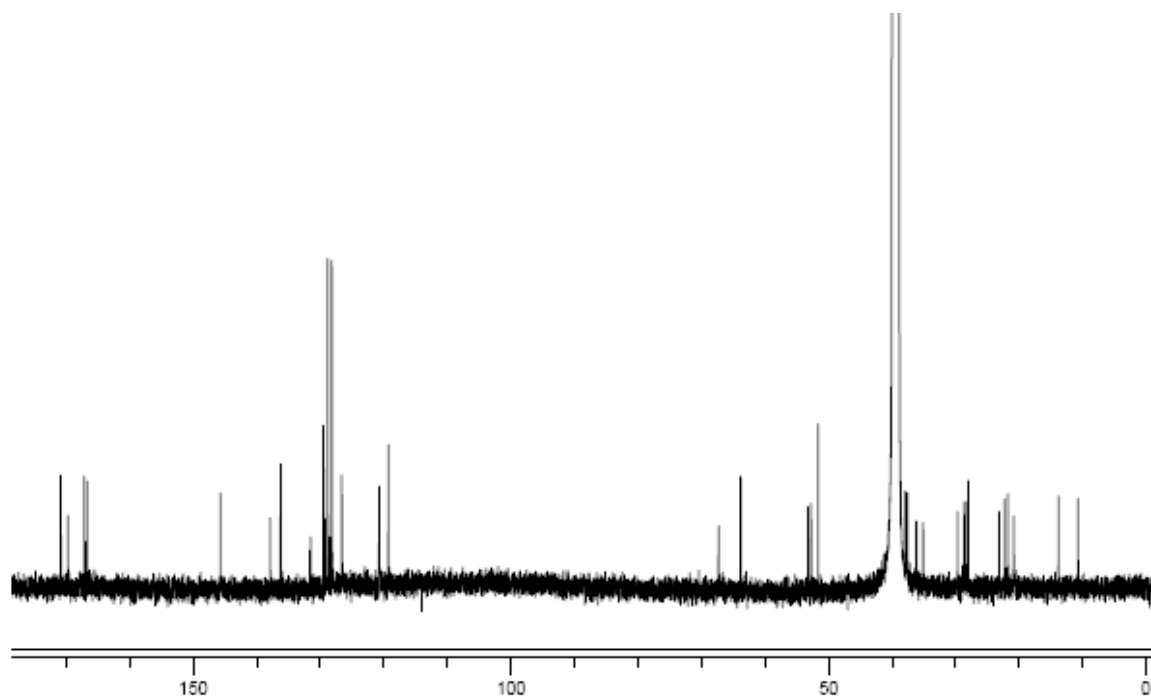

**Macrocyclic DKP 14.**

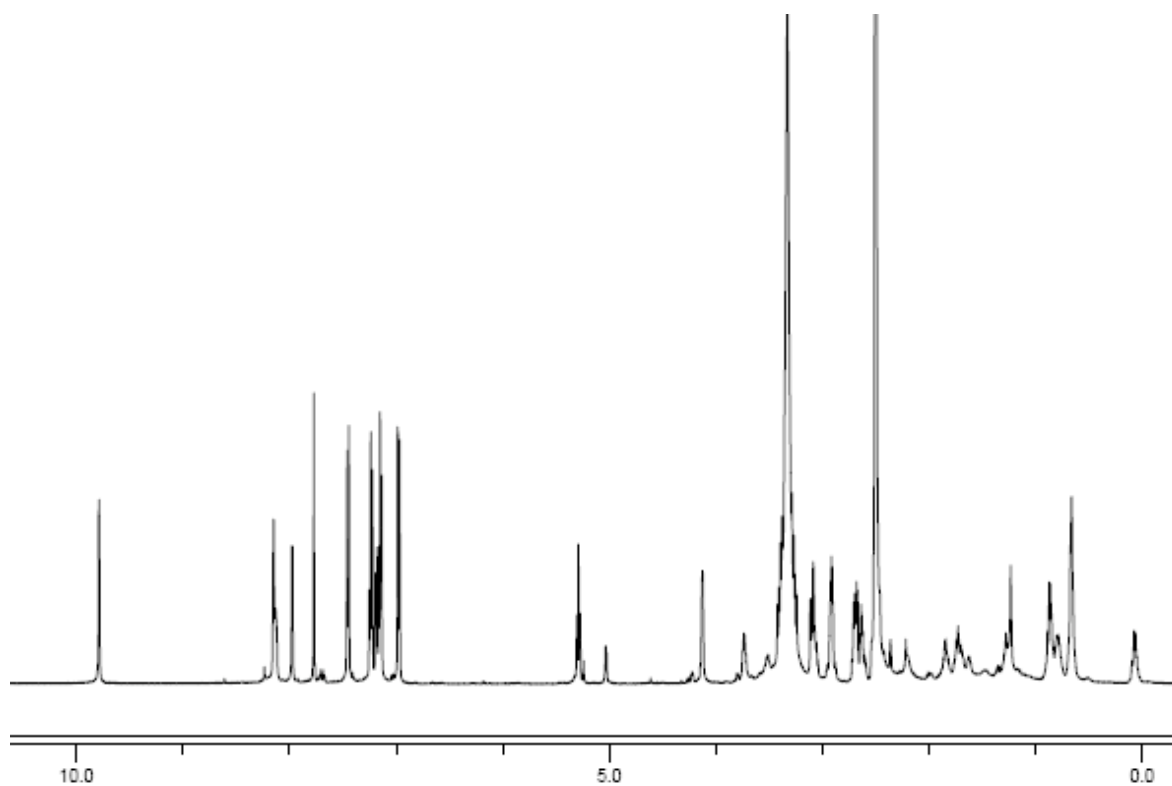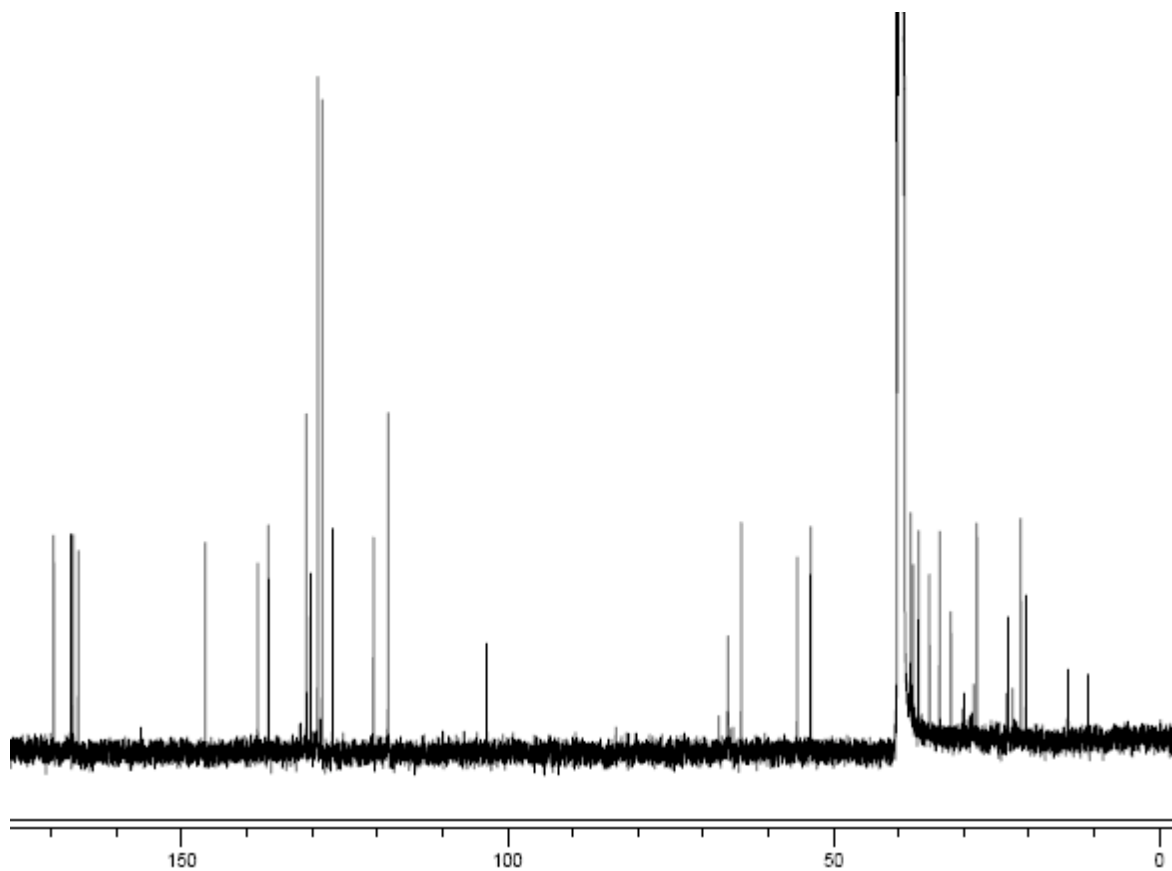



1. Lundquist JT & Pelletier JC (2001) Improved Solid-Phase Peptide Synthesis Method Utilizing  $\alpha$ -Azide-Protected Amino Acids. *Org Lett* 3:781-783.
2. Talaga P, Benezra C & Stampf J-L (1990) Stereochemistry of the michael addition of lysine derivatives to [alpha]-methylene-[gamma]-butyrolactones. *Bioorg Chem* 18:199-206.
3. Galibert M, Dumy P & Boturyn D (2009) One-Pot Approach to Well-Defined Biomolecular Assemblies by Orthogonal Chemoselective Ligations. *Angew Chem Int Ed* 48:2576-2579.

## Analysis of Chemical Space Coverage

We analyzed the chemical diversity of the 14 macrocyclic compounds reported in this work as follows.

Firstly, in order to put the diversity of compounds into context to other typical chemical libraries we randomly selected a set of 657 approved drugs from DrugBank[1] and 746 compounds from the Chembridge screening library, as downloaded from ZINC[2] (all structures are given as well in the supplementary material). For both libraries as well as our newly synthesized structures TAE/RECON[3] electrostatic potential (RECON\_EP1 to RECON\_EP9) and electrostatic potential autocorrelation descriptors (RA\_EP1 to RA\_EP9) were calculated as implemented in the Molecular Operating Environment (MOE). These descriptors capture the diversity of chemical structures with respect to their electrostatic surface properties which are of crucial importance to binding, but implicitly and partially (due to the autocorrelation descriptors) also information about the shape of the molecule. The resulting 20-dimensional descriptor space was subject to principal component analysis (PCA) in the same program and the first two resulting principle components were displayed in Figure 5 in the manuscript.

[1] DrugBank: a knowledgebase for drugs, drug actions and drug targets. Wishart DS, Knox C, Guo AC, Cheng D, Shrivastava S, Tzur D, Gautam B, Hassanali M. *Nucleic Acids Res.* 2008; 36: D901-6.

[2] ZINC - A Free Database of Commercially Available Compounds for Virtual Screening. Irwin JJ, Shoichet BK. *J. Chem. Inf. Model.* 2005; 45: 177-82.

[3] New developments in PEST shape/property hybrid descriptors. Breneman CM, Sundling CM, Sukumar N, Shen L, Embrechts MJ. *J. Comp.-Aided Mol. Des.* 2003; 17: 231 – 240.

## SMILES of FDA-Approved Drugs

P(OCC1cnc(C)C(O)C1C=O)(=O)([O-])[O-]  
O=C1N=C(NC=2NCC(NC1=2)CNc1ccc(cc1)C(=O)N[C@@H](CCC(=O)[O-])C(=O)[O-])N  
O=C([O-])[C@@H]([NH3+])Cc1[nH]cnc1  
O=C(C(=O)[O-])C  
OCC[N+](C)(C)C  
O=C([O-])[C@@H]([NH3+])CCCC[NH3+]  
O=C([O-])[C@@H]([NH3+])CCC[NH+]=C(N)N  
[NH2+](CCCC[NH2+])CCC[NH3+])CCC[NH3+]  
O=C([O-])[C@@H]([NH3+])CCC[NH3+]  
O=C(N)CC[C@H]([NH3+])C(=O)[O-]  
P(OC[C@H]1O[C@@H](n2c3ncnc(N)c3nc2)[C@H](O)[C@@H]1O)(=O)([O-])[O-]  
OC1CC(C)(C)C(\C=C\C(=C\C=C\C(=C\C=C\C=C(\C=C\C2C(CC(O)C=C2C)(C)C)/C)/C)\C)\C)=C(C1)  
C  
O=C1NC(=O)N=C2N(c3cc(C)C(cc3N=C12)C)C[C@@H](O)[C@@H](O)[C@@H](O)CO  
O1[C@H](CO)[C@@H](O)[C@H](O)[C@@H](NC(=O)C)C1O  
O=C([O-])CC[C@H]([NH3+])C(=O)[O-]  
P(OC[C@H]([NH3+])C(=O)[O-])(OC[C@H](OC(=O)CCC)COC(=O)CC)(=O)[O-]  
O[C@H]1C\C(=C\C=C/2\C3CC[C@H]([C@@H](CCCC(O)(C)C)C)[C@]3(CCC\2)C)\C(CC1)=C  
O=C([O-])CN(C(=[NH2+])N)C  
O=C([O-])C([NH3+])CC(C)C  
O=C([O-])[C@@H]([NH3+])Cc1c2c([nH]c1)cccc2  
SC[C@H]([NH3+])C(=O)[O-]  
s1c[n+](Cc2cnc(nc2N)C)C(C)C1CCO  
O=C([O-])[C@@H]([NH3+])CCCNC(=O)N  
O=C([O-])[C@@H]([NH3+])[C@H](O)C  
P(OC[C@H]1O[C@@H](N2C=C(CC=C2)C(=O)N)[C@H](O)[C@@H]1O)(OP(OC[C@H]1O[C@@H](n2c3ncnc(N)c3nc2)[C@H](O)[C@@H]1O)(=O)[O-])(=O)[O-]  
O=C1N=C(Nc2ncc(nc12)CNc1ccc(cc1)C(=O)N[C@@H](CCC(=O)[O-])C(=O)[O-])N  
O=C([O-])[C@@H]([NH3+])C  
O=C1c2c(cccc2)C(=O)C=C1C  
O=C([O-])[C@H]1[NH2+]CCC1  
[nH]1c2c(ncnc2N)nc1  
O=C(N)C[C@H]([NH3+])C(=O)[O-]  
FC(F)(F)C1ccc(cc1)C(=NOCC[NH3+])CCCCOC  
O=C(N([C@@H](C(C)C)C(=O)[O-])Cc1ccc(cc1)-c1cccc1-c1n[n-]nn1)CCCC  
O(CC)C(=O)[C@@H]([NH2+])[C@H](C(=O)N1[C@@H]2[C@H](C[C@@H]1C(=O)[O-])CCC2)C)CCc1cccc1  
Oc1cc(ccc1O)C[C@H]([C@H](Cc1cc(O)C(O)cc1)C)C  
Clc1ccc(cc1)C(CC(=O)[O-])C[NH3+]  
[NH+])1(CCCC1c1cccnc1)C  
S1C[C@@]2(O[C@H]1C)C1CC[NH+](C2)CC1  
Clc1cccc1C1=NC(O)C(=O)Nc2c1cc(Cl)cc2  
O(CC(O)C[NH2+])C(C)C)C1ccc(cc1)CCC(OC)=O  
ClC=CC(O)(CC)C#C  
[NH3+])C(Cc1cccc1)(C)C  
O=C(N)C1(c2c(-c3c1cccc3)cccc2)CCC[NH2+])C(C)C  
O(C)C1cc(ccc1)[C@@]1(O)CCCC[C@@H]1C[NH+](C)C  
O1[C@H](CO)[C@@H](O)[C@H](O)[C@@H]1n1c2ncnc(N)c2nc1  
O(CC(O)C[NH2+])C(C)C)C1ccc(cc1)CCOCC1CC1  
Fc1cc(F)ccc1C(O)(Cn1ncnc1)Cn1ncnc1  
O(C(CC)CC)[C@@H]1C=C(C[C@H]([NH3+])[C@H]1NC(=O)C)C(OCC)=O  
O(C(=O)CCC(OCC[N+])(C)(C)C)=O)CC[N+](C)(C)C  
S(=O)(=O)(N1CC[NH+](CC1)C)C1cc(C2=NC(=O)c3n(nc(c3N2)CCC)C)C(OCC)cc1  
S(=O)(=O)(Nc1ccc(cc1)CC[NH+](CCOc1ccc(NS(=O)(=O)C)cc1)C)C  
Clc1ccc(cc1)-c1c(nc(nc1N)N)CC  
O(C)C1c(OC)cc(cc1OC)C(O[C@@H]1C[C@H]2[C@H](C[C@H]3[NH+](CCc4c5c([nH]c34)cc(OC)cc5)C2)[C@H](C  
(OC)=O)[C@H]1OC)=O  
O1[C@H](CC)[C@](O)(C)[C@H](O)[C@H]([NH+])C[C@@H](C[C@](O)(C)[C@H](O[C@@H]2O[C@@H](C[C@H]([NH  
+])(C)C)[C@H]2O)C)C)[C@H](O[C@@H]2O[C@@H](C)[C@H](O)[C@](OC)(C2)C)[C@@H](C)C1=O)C)C)C  
Clc1cccc1C[NH+])1CCc2sccec2C1  
O(C)C1ccc(cc1C12CC3CC(C1)CC(C2)C3)-c1cc2c(cc(cc2)C(=O)[O-])cc1  
S(=O)([O-])(=NC(=O)NC(C)C)C1c[nH+]ccc1Nc1cc(ccc1)C  
Oc1cc2C[C@H]([N+](/c2cc1O)=C\C=C/1\N=C(N[C@@H](C\1)C(=O)[O-])C(=O)[O-])C(=O)[O-]  
S(=O)([O-])(=NC(=O)NC1CCC(CC1)C)C1ccc(cc1)CCNC(=O)N1CC(C)=C(CC)C1=O  
F[C@@]12[C@H]([C@@H]3C[C@H](C)[C@](OC(=O)C)(C(=O)COC(=O)C)[C@]3(C[C@@H]1O)C)C[C@H](F)C1=CC(=O)C=C[C@@]12C  
O1C(COC12CCCCC2)C[NH+]=C(N)N  
O1[C@@H](C[C@@H](O)CC1=O)CC[C@@H]1[C@@H]2C(=C[C@@H](C[C@@H]2OC(=O)[C@H](CC)C)C)C=C[C@@H]1C

ClC(F)C(F)(F)OC(F)F  
 s1cc(nc1N)CC(=O)N[C@H]1[C@H]2SCC(CSc3nnnn3CC[NH+](C)C)=C(N2C1=O)C(=O)[O-]  
 O=C([O-])C[C@H](CC(C)C)C[NH3+]  
 Clc1cc2c(N(C)C(=O)C(O)N=C2c2cccc2)cc1  
 Clc1cc2NC(N(S(=O)(=O)c2cc1S(=O)(=O)N)C)CC1  
 Oc1cc(N)ccc1C(=O)[O-]  
 O1CC[NH2+]C[C@H]1[C@H](Oc1cccc1OCC)c1cccc1  
 BrCCC(=O)N1CCN(CC1)C(=O)CCBr  
 O=C1NC(=O)NC(=O)C1(C(C)C)CC  
 O=C1Nc2c(nc2C)N(c2nc2)C1CC1  
 Clc1nc(N)c2ncn(c2n1)[C@H]1O[C@H](CO)[C@H](O)C1  
 Oc1ccc(N)cc1C(=O)[O-]  
 O(C(c1cccc1)c1cccc1)C1C[C@H]2[NH+](C1)CC2)C  
 S(=O)(=O)(c1ccc(N)cc1)c1ccc(N)cc1  
 Clc1cc(Cl)ccc1[C@H]1(O[C@H](CO)Coc1ccc(N2CC[NH+](CC2)C(C)C)cc1)Cn1ncn1  
 O=C1NC(=O)NC1(c1cccc1)c1cccc1  
 Oc1c2c(ccc1)[C@H]([C@H]1C(C(=O)[C@H]3(O)[C@H]([C@H]([NH+](C)C)C(=O)/C(=C(/[O-]  
 ])\N)/C3=O)[C@H]1O)=C2[O-])C  
 Oc1ccc(cc1)C(=C(CC)c1ccc(O)cc1)CC  
 Clc1cccc1C(ncn1)(c1cccc1)c1cccc1  
 Clc1c2CN3CC(=O)N=C3Nc2ccc1C1  
 O=C(N(CC)c1cccc1)C=CC  
 O1c2c(cccc2)C(=O)C(CC=2C(=O)c3c(OC=2[O-])cccc3)=C1[O-]  
 Ic1c(C(=O)[O-])c(I)c(NC(=O)C)c(I)c1NC(=O)C  
 S(=O)(=O)(Nc1cc(OC)c(Nc2c3c([NH+])c4c2cccc4)cccc3)cc1)C  
 O=C1N(C)C(=O)N(c2nc[nH]c12)C  
 O=C(N)C(CC[NH+](C(C)C)C(C)C)(c1cccc1)c1ncccc1  
 O=C(Nc1c(cccc1C)C)C[NH+](CC)CC  
 P(=O)([O-])([O-])C(P(=O)([O-])[O-])(O)CC[NH3+]  
 Clc1ccc(cc1)[C@H](OCC[C@H]1[NH+](CCC1)C)(C)c1cccc1  
 S(Oc1cc2CC[C@H]3[C@H]4CCC(=O)[C@H]4(CC[C@H]3c2cc1)C)(=O)(=O)[O-]  
 O(C(=O)c1n(cnc1)C(C)c1cccc1)CC  
 O1[C@H]2[C@H]34[C@H]([C@H]([NH+](CC3)C)Cc3c4c1c(O)cc3)C=C[C@H]2O  
 S([C@H]1C[C@H]([NH2+]C1)C(=O)Nc1cc(ccc1)C(=O)[O-])C=1[C@H]([C@H]2N(C=1C(=O)[O-]  
 ])C(=O)[C@H]2[C@H](O)C)C  
 O=C1N(C)C(=O)N(C)C(=O)C1(C(C)C)CC=C  
 S(=O)(=O)(Nc1ccc(cc1)C(O)CCC[NH+](CCCCC)CC)C  
 O(C)c1cc2N([C@H]3[C@H]4([C@H]5[NH+](CC=C[C@H]5(CC)[C@H](O)[C@]3(O)C(=O)N)CC4)c2cc1[C@H]1(c  
 2[nH]c3c(c2CC[NH+]2C[C@H](O)(C[C@H](C1)C2)CC)cccc3)C(OC)=O)C  
 s1c2cc(OCC)ccc2nc1S(=O)(=O)N  
 O1C[C@H](NC1=O)Cc1cc2c([nH]cc2CC[NH+](C)C)cc1  
 Clc1cc(Nc2ncnc3c2cc(OCCC[NH+]2CCOCC2)c(OC)c3)ccc1F  
 O1[C@H]2[C@H]34[C@H]([C@H]([NH+](CC3)C)Cc3c4c1c(OC)cc3)C=C[C@H]2O  
 S1[C@H]2N([C@H](C(=O)[O-])C1(C)C)C(=O)[C@H]2NC(=O)[C@H](NC(=O)N1CCN(CC)C(=O)C1=O)c1cccc1  
 O1[C@H](NC(=O)[C@H]2C[C@H]3[C@H]([NH+](C2)C)Cc2c4c3cccc4[nH]c2)(C)C(=O)N2[C@H](Cc3cccc3)C(  
 =O)N3[C@H](CCC3)[C@H]12O  
 [NH+](CCC=C1c2c(CCc3c1cccc3)cccc2)(C)C  
 F[C@H]12[C@H]([C@H]3CC[C@H](O)(C(=O)C)[C@]3(C[C@H]1O)C)C[C@H](C1=CC(=O)C=C[C@H]12)C)C  
 O=[N-]  
 OCC([NH2+]CC[NH2+]C(CC)CO)CC  
 [NH+](=C(N)N)C(=NH2+)N(C)C  
 O(CC(O)C[NH2+]C(C)C)c1ccc(cc1)CC(=O)N  
 O=C(N)c1nccn1  
 [NH2+](CCCC1c2c(C=Cc3c1cccc3)cccc2)C  
 O1CCCC1C(=O)NCCN(C)c1nc(N)c2cc(OC)c(OC)cc2n1  
 FC(F)(F)c1cc([N+](=O)[O-])c(cc1)C(=O)C1C(=O)CCCC1=O  
 ON1C(N)=CC(=NC1=N)N1CCCC1  
 O=C1CC[C@H]2([C@H]3[C@H]([C@H]4CC[C@H](O)(C(=O)C)[C@]4(CC3)C)C=C(C2=C1)C)C  
 Clc1cc2NC(Oc2cc1)=O  
 O=C1NC(=O)CCC1(CC)c1ccc(N)cc1  
 S(=O)(=O)(Nc1ncccc1)c1ccc(N)cc1  
 Clc1cc2NC(N3CC[NH+](CC3)C)=C3C(=Nc2cc1)C=CC=C3  
 O(C)(c1cccc1)c1ncccc1)CC[NH+](C)C  
 S1c2c(N(c3c1cccc3)CCC[NH+]1CC[NH+](CC1)C)cc(SCC)cc2  
 [NH2+](CC[NH2+]CC[NH3+])CC[NH2+]CC[NH3+]  
 OC(CC[NH+]1CCCC1)(C1CCCC1)c1cccc1  
 O=C1NC(=O)C[NH+](C1)C[C@H]([NH+]1CC(=O)NC(=O)C1)C  
 Clc1cccc1C1C(C(OCC)=O)=C(NC(C)=C1C(OC)=O)COCC[NH3+]  
 [nH+]1c2c(CCCC2)c(N)c2c1cccc2  
 FC(F)(F)C(=O)N1CC(OC(C)C1O)O[C@H]1c2c(C[C@H](O)(C1)C(=O)COC(=O)CCCC)c(O)c1c(C(=O)c3c(cccc3O  
 C)C1=O)c2O

OC(CC[NH+]1CCCC1)(C1CCCC1)c1cccc1  
 O1CC(=CC1=O)C1CC[C@]2(O)[C@H]3[C@H](C[C@@H](O)[C@]12C)[C@@]1([C@@H](C[C@@H](O[C@@H]2O[C@H](C)[C@@H](O[C@@H]4O[C@H](C)[C@@H](O[C@@H]5O[C@H](C)[C@@H](O)[C@@H](O)C5)[C@@H](O)C4)[C@@H](O)C2)CC1)CC3)C  
 S(=O)(=O)(N)c1cc(C(=O)NCC2[NH+](CCC2)CC)c(OC)cc1  
 O(C(=O)C=C1C(C(C(OCCOC)=O)=C(NC=1C)C)c1cc([N+](=O)[O-])ccc1)C(C)C  
 C1[C@@]12[C@H]([C@@H]3C[C@H](C)[C@]1(O)(C(=O)CO)[C@]3(C[C@@H]1O)C)CCC1=CC(=O)C=C[C@@]12C  
 O[C@H]([C@H]([NH3+])C)c1cccc1  
 Clc1ccc(nc1)N1[C@H](OC(=O)N2CC[NH+](CC2)C)c2nccnc2C1=O  
 Clc1cc2c(-n3c(nnc3C)CN=C2c2cccc2)cc1  
 Brclccc(cc1)[C@H](CC[NH+](C)C)c1ncccc1  
 [N+](C)(C)=C1C=CC(C=C1)=C(c1ccc(N(C)C)cc1)c1ccc(N(C)C)cc1  
 Clc1cc2c(Oc3c(N=C2N2CC[NH+](CC2)C)cccc3)cc1  
 O(CC[N+](C)(C)C(=O)N  
 S(=O)([O-])(=NC(=O)NC1CCCC1)c1ccc(cc1)C(=O)C  
 O1c2cc(C[C@H]3[N+](CCc4cc(OC)c(OC)c(Oc5ccc(C[C@@H]6[N+](CCc7cc(OC)c1cc67)(C)C)cc5)c34)(C)C)c  
 cc2OC  
 S1[C@H]2N([C@@H](C(=O)[O-])C1(C)C)C(=O)[C@H]2NC(=O)COc1cccc1  
 O=C1NC(=O)NC(=O)C1([C@@H](CCC)C)CC=C  
 S1c2c(N(c3c1cccc3)CCC[NH+](C)C)cccc2  
 O(CC(O)COC(=O)N)c1cccc1OC  
 O(C(=O)[C@H](CO)c1cccc1)C1CC2[NH+](C(C1)CC2)C  
 O=C(N(C)C)Cc1n2C=C(C=Cc2nc1-c1ccc(cc1)C)C  
 [NH+]1(CCCC1)C\C=C(/c1ccc(cc1)C)\c1ncccc1  
 O1[C@H](CO)[C@@H](O)[C@H](O)[C@@H](NC(=O)N(N=O)C)[C@H]1O  
 O[C@H]1C[C@@H](O)[C@H](\C=C\C[C@@](O)(CCCC)C)[C@H]1C\C=C\C[CCCC](=O)[O-]  
 Clc1c(Cl)C(Cl)C(Cl)C(Cl)C1C1  
 FC(F)(F)C1=CN([C@@H]2O[C@H](CO)[C@@H](O)C2)C(=O)NC1=O  
 Clc1cc2N(c3c(Sc2cc1)cccc3)CCC[NH+]1CC[NH+](CC1)C  
 O(C)c1c(OC)cc(cc1OC)Cc1cnc(nc1N)N  
 FC1(F)[C@H](O)[C@H](O[C@H]1N1C=CC(=NC1=O)N)CO  
 O=C1N=C(Nc2n(cnc12)[C@H]1C[C@H](O)[C@@H](CO)C1=C)N  
 s1cccc1C1OC[C@H]2O[C@@H](O[C@H]3[C@@H]4[C@@H]([C@@H](c5c3cc3OCoc3c5)c3cc(OC)c(O)c(OC)c3)C(OC  
 4)=O)[C@H](O)[C@@H](O)[C@@H]2O1  
 O1[C@@H](C)[C@H](O)[C@@H]([NH3+])C[C@@H]1O[C@@H]1c2c(C[C@](O)(C1)C(=O)CO)c(O)c1c(C(=O)c3c(cc  
 cc3OC)C1=O)c2O  
 Clc(Cl)C(=O)NC(C(O)c1ccc([N+](=O)[O-])cc1)CO  
 S(=O)(Cc1nccc(OCC(F)(F)F)c1C)c1[nH]c2c(n1)cccc2  
 Fc1ccc(cc1)C(=O)CCC[NH+]1CCC(N2c3c(NC2=O)cccc3)=CC1  
 Ic1cc(cc1)C1Oc1cc(I)c(O)c(I)c1C[C@H]([NH3+])C(=O)[O-]  
 Clc1c2c(C([O-])=C3[C@H](C[C@@H]4[C@@](O)(C(=O)\C(=C(/[O-]  
 ])\NCO)\C(=O)[C@H]4[NH+](C)C)C3=O)[C@@]2(O)C)c(O)cc1  
 O(C(=O)C1(CC[NH+](CC1)C)c1cccc1)CC  
 Clc1cc2c(cc1)C(c1ncccc1CC2)=C1CCN(CC1)C(OCC)=O  
 s1cccc1CC(=O)N[C@H]1[C@H]2SCC(COC(=O)C)=C(N2C1=O)C(=O)[O-]  
 o1cccc1C(=O)N1CCN(CC1)c1nc(N)c2cc(OC)c(OC)cc2n1  
 [NH+](CCCN1c2c(CCc3c1cccc3)cccc2)(C)C  
 O(C)c1cc(C)c(\C=C\C(=C\C=C\C(=C/C(=O)[O-])\C)\C)c(C)c1C  
 O(C(=O)C1=CC=C2C3=NC(=Cc4[nH]c(C=C5N=C(C=C6[nH]c(=C3)c(C)c6C=C)C(C)=C5CCC(=O)[O-]  
 ])c(CCC(OC)=O)c4C)[C@]2(C)[C@@H]1C(OC)=O)C  
 O(C)c1cc2c(cc(cc2)CCC(=O)C)cc1  
 O1C2[C@H]3OC(=O)[C@@]45O[C@@H]4C[C@@](O)(C([C@@H]2C(O)(C)C)C1=O)[C@@]35C  
 Fc1cc2c(nc1N1CC[NH2+])CC1)N(C=C(C(=O)[O-])C2=O)CC  
 O(C)c1cc2c(nccc2[C@@H](O)[C@H]2[NH+]3C[C@@H](C(C2)CC3)C=C)cc1  
 O1c2c([C@H]3[C@@H](CCC(=C3)C)C1(C)C)c(O)cc(c2)CCCC  
 Clc1cc2nc(ccc2cc1)\C=C\c1cc(ccc1)[C@H](SCC1(CC1)CC(=O)[O-])CCc1cccc1C(O)(C)C  
 O(C(=O)c1cccc1)C(C[NH2+])C1CCCC1)C  
 O=C1N(C)C(=O)NC(=O)C1(C(C#CCC)C)CC=C  
 s1cccc1[C@@H](Oc1c2c(ccc1)cccc2)CC[NH2+])C  
 O=C1NC(=O)CCC1N1Cc2c(cccc2N)C1=O  
 s1c2c(ccc(O)c2)c(C(=O)c2ccc(OCC[NH+]3CCCC3)cc2)c1-c1ccc(O)cc1  
 S(=O)(=O)(N)c1ccc(-n2nc(cc2-c2ccc(cc2)C)C(F)(F)F)cc1  
 O(CC[NH+](CC)CC)c1c(OCC[NH+](CC)CC)cccc1OCC[NH+](CC)CC  
 Brclc2nccnc2ccc1Nc1=[NH+][CCN1  
 Clc1cccc(Cl)c1-c1noc(C)c1C(=O)N[C@H]1[C@H]2SC(C)(C)[C@@H](N2C1=O)C(=O)[O-]  
 Fc1cc2c(N(C=C(C(=O)[O-])C2=O)CC)cc1N1CC[NH+](CC1)C  
 n1c(nc(nc1N(C)C)N(C)C)N(C)C  
 S(=O)(=O)(Nc1ccc(cc1)C(O)C[NH2+])C(C)C  
 O=C1N(CCCC[NH+]2CCN(CC2)c2ncccn2)C(=O)CC2(C1)CCCC2  
 O1[C@H](CO)[C@@H](N=[N+]=[N-])C[C@@H]1N1C=C(C)C(=O)NC1=O  
 O1CCc2cc(ccc12)CC[NH+]1C[C@@H](CC1)C(C(=O)N)(c1cccc1)c1cccc1

OC(CC[N+](CC)(CC)CC)(C1CCCCC1)c1ccccc1  
 O=C1CC[C@@H]2[C@@H]3[C@H]([C@@H]4CC[C@@]([O])(C#C)[C@]4(CC3)CC)CCC=C1  
 O1CC(=CC1=O)[C@H]1CC[C@]2(O)[C@H]3[C@H](CC[C@]12C)[C@@]1([C@@H](CC(O[C@@H]2O)[C@H](C)[C@@H](O[C@@H]4O[C@H](C)C(O[C@@H]5O[C@H](C)[C@@H](O)[C@@H](OC(=O)C)C5)[C@@H](O)C4)[C@@H](O)C2)CC1)CC3)C  
 O(C)c1cc2[C@]34[C@@H]([C@H]([NH+](CC3)C)Cc2cc1)CCCC4  
 [AlH2-](O[AlH2-])O  
 S(CCC)c1cc2[nH]c(nc2cc1)NC(OC)=O  
 O=C([O-])\C=C(\C=C\C=C(\C=C\C=C1(CCCC=1C)(C)C)/C)/C  
 Clc1cc2NC(N(c3ccccc3C)C(=O)c2cc1S(=O)(=O)N)C  
 S=C(Oc1cc2c(cc1)cccc2)N(C)c1cc(ccc1)C  
 O(CCCC)c1nc2c(cccc2)c(c1)C(=O)NCC[NH+](CC)CC  
 O(C(=O)C=1C(C(C(OC)=O)=C(NC=1C)C)c1cc([N+](=O)[O-])ccc1)C(C[NH+](CCC(c1ccccc1)c1ccccc1)C)(C)C  
 P(=O)([O-])([O-])C(=O)[O-]  
 Fc1cc2c(N(C=C(C(=O)[O-])C2=O)C2CC2)cc1N1CC[NH2+][CC1  
 ClCC\C=C(\c1ccc(OC[NH+](C)C)cc1)/c1ccccc1\c1ccccc1  
 O(C)c1cc2N([C@@H]3[C@@]4([C@H]5[NH+](CC=C[C@@]5(CC)[C@@H](OC(=O)C)[C@]3(O)C(OC)=O)CC4)c2cc1[C@@]1(c2[nH]c3c(c2CC[NH+])2C[C@@](O)(C[C@@H](C1)C2)CC)cccc3)C(OC)=O)C=O  
 O(C(=O)N(C)C)c1ccc[n+](c1)C  
 F[C@@]12[C@H]([C@@H]3C[C@@H](C)[C@H](C(=O)CO)[C@]3(C[C@@H]1O)C)CCC1=CC(=O)C=C[C@@]12C  
 O=C([O-])CCCCCCC(=O)[O-]  
 S=C1NC(=CC(=O)N1)CCC  
 O1c2c(C=CC1=O)cc1c(occl)c2OC  
 S1(=O)(=O)N(C)\C(=C(\[O-])/Nc2ncccc2)\C(=O)c2c1cccc2  
 FC(F)(C(F)(F)F)C(F)(F)F  
 Clc1ccc(cc1)C([NH+])1CC[NH+](CC1)COC(O)c1ccccc1  
 O1[C@@H]([C@H](O)[C@H](O)CO)[C@H](NC(=O)C)[C@@H]([NH+]=C(N)N)C=C1C(=O)[O-]  
 S(=O)(=O)(Nc1nc(nc(OCCO)c1Oclcccc1OC)-c1ncccc1)c1ccc(cc1)C(C)C  
 Oc1c2c(C[C@@H]3C(C(=O)[C@@]4(O)[C@@H](C3)[C@H]([NH+](C)C)C(=O)/C(=C([O-])\N)/C4=O)=C2[O-])c(N(C)C)cc1NC(=O)C[NH2+][C(C)C(C)C  
 O1CC[NH+](CC1)CCC1CN(CC)C(=O)C1(c1ccccc1)c1ccccc1  
 S1[C@H]2N(C(C(=O)[O-])=C(C1)C)C(=O)[C@H]2NC(=O)[C@H]([NH3+])c1ccccc1  
 O(C)c1cc2N([C@@H]3[C@@]4([C@H]5[NH+](CC=C[C@@]5(CC)[C@@H](OC(=O)C)[C@]3(O)C(OC)=O)CC4)c2cc1[C@@]1(c2[nH]c3c(c2CC[NH+])2C[C@@](O)(C[C@@H](C1)C2)CC)cccc3)C(OC)=O)C  
 O(CC(O)C[NH2+])C(C)C)c1c2c(ccc1)cccc2  
 O(c1cc(ccc1)C(C(=O)[O-])C)c1ccccc1  
 Clc1cccc(C1)c1NC1=[NH+][CCN1  
 O=C1N=C(Nc2n(cnc12)COCOC(=O)[C@@H]([NH3+])C(C)C)N  
 Clc1ccc(cc1)C1(O)N2C(=NCC2)c2c1cccc2  
 Fc1cc(F)ccc1[C@](O)([C@@H](C)c1ncncc1F)Cn1ncn1  
 O=C([O-])C[C@@H](O)C[N+](C)(C)C  
 O(CC)C(=O)[C@H]([NH2+][C@H](C(=O)N1CCC[C@H]1C(=O)[O-])C)CCc1ccccc1  
 slcc(nc1\C=C\c1cc(NC(=O)CC(CC)(CC)C(=O)[O-])ccc1)ClCCCC1  
 O1c2c(OCC1C(=O)N1CCN(CC1)c1nc(N)c3cc(OC)c(OC)cc3n1)cccc2  
 [NH2+])1CC[NH2+][CC1  
 Oc1ccc(cc1C(=O)N)C(O)C[NH2+][C(CCC1ccccc1)C  
 O(Cc1ccccc1)c1ccc(O)cc1  
 O=C1CC[C@@]2([C@@H]3[C@H]([C@@H]4CC[C@@]([O])(C(=O)C)[C@]4(CC3)C)C[C@@H](C2=C1)C)C  
 Clc1cc(C(=O)N2CC[NH+](CC2OC)CCOCc2ccc(F)cc2)c(OC)cc1N  
 S(=O)(C)c1ccc(cc1)C=C1c2c(cc(F)cc2)C(CC(=O)[O-])=C1C  
 S1[C@H]2N([C@@H](C(=O)[O-])C1(C)C)C(=O)[C@H]2NC(=O)c1c2c(ccc1OCC)cccc2  
 S=C(N)c1cc(nc1)CC  
 O(CC(O)C[NH2+])C(C)C)c1ccc(cc1)COCOC(C)C  
 Clc1cc2[nH+]ccc(Nc3cc(C[NH+](CC)CC)C(O)cc3)c2cc1  
 O1CCN(N=Cc2oc([N+](=O)[O-])cc2)C1=O  
 F[C@@]12[C@H]([C@@H]3C[C@@H](O)[C@](O)(C(=O)CO)[C@]3(C[C@@H]1O)C)CCC1=CC(=O)C=C[C@@]12C  
 O1C[C@]2([C@H](CC1=O)CC[C@H]1[C@@H]3CC[C@@](O)(C)[C@]3(CC[C@@H]12)C)C  
 S1c2c(N(c3c1cccc3)CCC[NH+])1CC[NH+](CC1)C(O)cc(cc2)C(F)F  
 O=C1CC[C@@]2([C@@H]3[C@H]([C@@H]4CC[C@@]([O])(C@]4(CC3)C)CCC2=C1)C  
 Clc1cc2c(NC(O[C@]2(C#CC2CC2)C(F)F)F)=O)cc1  
 Clc1cc2c(NC(=O)C(N=C2c2cccc2)C(=O)[O-])cc1  
 OCCCCCCCCCCCCCCCCCCCCC  
 [nH]1cncclC(C)c1cccc(C)c1C  
 S(=O)([O-])(=NC(=O)C)c1ccc(N)cc1  
 Fc1ccc(cc1)Cn1c2c(nc1NC1CC[NH+](CC1)CCc1ccc(OC)cc1)cccc2  
 Clc1cccc(C1)c1SC(CCC1ccc(C1)cc1)Cn1ccn1  
 O1[C@H](CO)[C@@H](O)[C@@H](O)[C@@H]1n1c2ncnc(N)c2nc1  
 O1[C@@H](C[C@@H](O)CC1=O)CC[C@@H]1[C@@H]2C(=C[C@@H](C[C@@H]2OC(=O)C(CC)(C)C)C=C[C@@H]1C  
 O=C1N=C(Nc2[nH]cc(c12)CCc1ccc(cc1)C(=O)N[C@H](CCC(=O)[O-])C(=O)[O-])N  
 O(C(=O)Nc1[nH]c2cc(ccc2n1)C(=O)c1ccccc1)C







O=C1C[C@H](O)[C@H](\C=C\[C@H](O)CCCC)[C@H]1C\C=C/CCCC(=O)[O-]  
S(=O)(=O)(N1CCCC1)Cc1cc2c([nH]cc2CC[NH+](C)C)cc1  
O1[C@H]2[C@H](O[C@H]3O[C@H](CC(=O)[C@]13O)C)[C@H](O)[C@H]([NH2+]C)[C@H](O)[C@H]2[NH2+]C  
O=C1NN=C([C@H](C1)C)c1ccc(NN=C(C#N)C#N)cc1  
ClCC[NH+](Cc1cccc1)C(COc1cccc1)C  
s1cc(nc1[NH+]=C(N)N)CSCCC(N)=NS(=O)(=O)N  
Oc1c2c(ccc1)C([C@H]1C(C(=O)[C@]3(O)[C@H]([C@H]([NH+](C)C)C(=O)/C(=C(/[O-]  
))\N)/C3=O)[C@H]1O)=C2[O-])=C  
[NH2+](CCCC12CCC(c3c1cccc3)c1c2cccc1)C  
Oc1cccc1C(=O)[O-]  
Oc1ccc(cc1CO)C(O)C[NH2+]CCCCCOCCCCc1cccc1  
O1c2c(cccc2)C(c2c1cccc2)C(OCC[N+](CC)(CC)C)=O  
O(C(=O)N(CCCCCCCCN(C(Oc1cc([N+](C)(C)C)ccc1)=O)C)C)c1cc([N+](C)(C)C)ccc1  
O1c2c(cccc2)C(=O)C(C(Cc2cccc2)=C1[O-])  
S1[C@H]2N([C@H](C(=O)[O-]  
])C1(C)C)C(=O)[C@H]2NC(=O)[C@H](NC(=O)N1CCN(S(=O)(=O)C)C1=O)c1cccc1  
O(CC(COC(=O)N)c1cccc1)C(=O)N  
O=C(NN)c1ccncc1  
O1[C@H](CC)[C@H](O)(C2O[C@H]([NH2+][C@H]([C@H]2C)[C@H](C[C@](O)(C)[C@H](O[C@H]2O[C@H](C  
[C@H]([NH+](C)C)[C@H]2O)C)[C@H](C)[C@H](O[C@H]2O[C@H](C)[C@H](O)[C@](OC)(C2)C)[C@H](C)C1  
=O)C)COCCOC)C  
O(C(=O)C)[C@]1(CC[C@H]2[C@H]3[C@H]([C@H]4C(=C/C(=N/O)/CC4)CC3)CC[C@]12CC)C#C  
O=C([O-])C1(CCC1)C(=O)[O-]  
O=C1C=C2[C@H]([C@H]3[C@H]([C@H]4CC[C@](O)(C(=O)CO)[C@]4(C[C@H]3O)C)C[C@H]2C)(C=C1)C  
O=C(Nc1c(ccc1C)C)C1[NH+](CCCC1)C  
BrC1ccc(cc1)C(=O)c1cccc(CC(=O)[O-])c1N  
Clc1cc(N)cc(C1)c1NC1=[NH+]CCN1  
O=C1N(CCc2n(c3c(c12)cccc3)C)Cc1nc[nH]c1C  
Clc1ccc(cc1)CC1=NN(C2CCC[NH+](CC2)C)C(=O)c2c1cccc2  
Fc1ccc(cc1)[C@H](O)CC[C@H]1[C@H](N(C1=O)c1ccc(F)cc1)c1ccc(O)cc1  
OCCN(CCO)c1nc(N2CCCC2)c2nc(nc(N3CCCC3)c2n1)N(CCO)CCO  
Fc1c2N(C=C(C(=O)[O-])C(=O)c2cc(F)c1N1CC([NH2+]CC1)C)CC  
OC1(CCCC1)C(C(OCC[NH+](C)C)=O)c1cccc1  
O=C([O-])C=C(C=CC=C(C=CC=1C(CCCC=1C)(C)C)C)C  
O(C)c1ccc(cc1)CC([NH2+])CC(O)c1cc(NC=O)c(O)cc1)C  
O=C1CC[C@H]2[C@H]3[C@H]([C@H]4CC[C@H](OC(=O)CCc5cccc5)[C@]4(CC3)C)CCC2=C1  
O(C(c1cccc1)c1cccc1)CC[NH+](C)C  
O(C(=O)C(O)(C1CCCC1)c1cccc1)C1CC[N+](C1)(C)C  
O=C1CC[C@H]2[C@H]3[C@H](CC[C@]12C)[C@H]1(C(=CC(=O)C=C1)C(C3)=C)C  
o1c(c(nc1CCC(=O)[O-])c1cccc1)-c1cccc1  
O(C(=O)CCC(=O)C[NH3+])C  
S(c1n(nc1[N+](=O)[O-])C)c1ncnc2nc[nH]c12  
[S-]C1OC(COC(=O)C)C(OC(=O)C)C(OC(=O)C)C1OC(=O)C  
O=C([O-])CC1(CCCCC1)C[NH3+]  
O1[C@H](C)[C@H](O)[C@H]([NH3+])C[C@H]1O[C@H]1c2c(C[C@](O)(C1)C(=O)CO)c(O)c1c(C(=O)c3c(c  
ccc3OC)C1=O)c2O  
Oc1ccc(cc1CO)C(O)C[NH2+]C(C)(C)C  
Clc1cc(C1)ccc1C(OCc1ccsc1Cl)Cn1ccnc1  
S(OCCCCOS(=O)(=O)C)(=O)C  
O=C(c1cc(ccc1)C(C(=O)[O-])C)c1cccc1  
Oc1cc([N+](CC)(C)C)ccc1  
O=C1C=C/C(=N/Nc2ccc(cc2)C(=O)NCCC(=O)[O-])/C=C1C(=O)[O-]  
S(=O)([O-])(=Nc1noc(c1)C)c1ccc(N)cc1  
Clc1cccc(C1)c1CC(=O)N=C(N)N  
O(C(C[N+](C)(C)C)C)C(=O)N  
O1[C@H]2[C@H](OC[C@H]2O)[C@H](O[N+](=O)[O-])C1  
O=C1c2c(cccc2)C(=O)C(C)=C1CC=C(CCCC(CCCC(C)C)C)C)C  
O1Cc2c(c(O)c(C\C=C\C(CCC(=O)[O-])/C)c(OC)c2C)C1=O  
O1c2c(cc(cc2)C(C)C)C(=O)c2cc(C(=O)[O-])c(nc12)N  
Clc1cc(C1)ccc1[C@]1(O[C@H](CO1)COc1ccc(N2CCN(CC2)C(=O)C)cc1)Cn1ccnc1  
ClC(C1)C(F)F)OC  
O(C(=O)N)C1(CCCCC1)C#C  
S(=O)(=O)(N(CCC)CCC)c1ccc(cc1)C(=O)[O-]  
S=C1N=CNC2nc[nH]c12  
O=C(NCC[NH+](CC)CC)c1ccc(N)cc1  
Oc1ccc(cc1[C@H](CC[NH+](C(C)C)C(C)C)c1cccc1)C  
[NH+](C[C@H](Cc1cccc1)C)(CC#C)C  
Clc1ccc(cc1)C(=O)c1ccc(OC(C(OC(C)C)=O)(C)C)cc1  
O=C/1C=C(C=C\C\1=C\C=C1C=CC(C=C1)=C(N)N)C(N)=N  
O=C1NC(=O)CCC1N1C(=O)c2c(cccc2)C1=O  
ClCCN(CCC1)c1ccc(cc1)CC([NH3+])C(=O)[O-]

Fc1cc2c(N(C=C(C(=O)[O-])C2=O)C2CC2)c(OC)c1N1CC([NH2+]CC1)C  
 FC(F)(CCCC)[C@@]1(O[C@H]2[C@H](CC1)[C@H](CCCCC(=O)[O-])C(=O)C2)O  
 OC[C@@H]1CC(n2c3nc(nc(NC4CC4)c3nc2)N)C=C1  
 O1C(NC(=O)C2CC3C([NH+](C2)C)Cc2c4c3cccc4[nH]c2)(C(C)C)C(=O)N2C(C(C)C)C(=O)N3C(CCC3)C12O  
 O=C([O-])C(C)c1ccc(cc1)CC(C)C  
 O(C(=O)C=C1C(C(OC)=O)C(NC=1C)C)c1cc([N+](=O)[O-])ccc1)CC  
 S1[C@H]2N([C@H](C(=O)[O-])C1(C)C)C(=O)[C@H]2NC(=O)[C@H]([NH3+])c1ccc(O)cc1  
 Oc1cc(ccc1O)C(O)C[NH2+]C(C)C  
 S(=O)([O-])(=NC(=O)NC1CCCC1)c1ccc(cc1)CCNC(=O)c1ncc(nc1)C  
 Clc1cccc1C1=NCC(=O)Nc2c1cc([N+](=O)[O-])cc2  
 OC1C\C(=C\C=C/2\C3CCC(C\C=C\C(C(C)C)C)C)C3(CCC\2)C)\C(CC1)C  
 S1c2c(N(c3c1cccc3)CC1C3CC[NH+](C1)CC3)cccc2  
 O(C(=O)N[C@@H](C(C)C)C(=O)N[C@H]([C@@H](O)CN(NC(=O)[C@@H](NC(OC)=O)C(C)C)C)Cc1ccc(cc1)-  
 c1ncccc1)Cc1cccc1)C  
 O(C(c1cccc1)c1cccc1)CC[NH+](C)C  
 O1CC(=CC1=O)[C@H]1CC[C@]2(O)[C@H]3[C@@H](C[C@@H](O)[C@]12C)[C@@]1([C@@H](C[C@@H](O[C@@H]2O[C@  
 @H](C)[C@@H](O[C@@H]4O[C@H](C)[C@@H](O[C@@H]5O[C@H](C)[C@@H](O[C@@H]6O[C@H](CO)[C@@H](O)[C@H]  
 )O)[C@H]6O)[C@@H](O)C5)[C@@H](O)C4)[C@@H](O)C2)CC1)CC3)C  
 O=C([O-])CCC([NH3+])C=C  
 O(C(=O)C1(CC[NH+](CC1)CCC(C#N)(c1cccc1)c1cccc1)c1cccc1)CC  
 O(Cc1n1c2c(nc1N1CCC[NH+](CC1)C)cccc2)CC  
 O1C[C@H](Cc2n(cnc2)C)[C@H](CC)C1=O  
 O1CC(=CC1=O)[C@H]1CC[C@]2(O)[C@H]3[C@@H]([C@]4(CO)[C@@](O)C[C@@H](O[C@@H]5O[C@@H](C)[C@H](O)  
 ) [C@@H](O)[C@H]5O)[C@H]4O)CC3)[C@H](O)C[C@]12C  
 O1c2c(C(=O)C[C@H]1c1cc(O)c(OC)cc1)c(O)cc(O)c2  
 Fc1ccc(cc1)-c1c2c(n(C(C)C)c1\C=C\C[C@H](O)C[C@H](O)CC(=O)[O-])cccc2  
 OCc1cc2CCC(Nc2cc1[N+](=O)[O-])C[NH2+]C(C)C  
 S(=O)(=O)(N(C)clnc(-c2ccc(F)cc2)c(\C=C\C[C@H](O)C[C@@H](O)CC(=O)[O-])c(n1)C(C)C)C  
 FC1=CN([C@@H]2O[C@H](C)[C@@H](O)[C@H]2O)C(=O)N=C1NC(OCCCC)=O  
 Oc1cc(ccc1O)[C@@H](O)C[NH2+]CCCCc1ccc(O)cc1  
 Clc1cc2[nH+]c3c(cc(OC)cc3)c(NC(CCC[NH+](CC)CC)C)c2cc1  
 Clc1cc(C1)ccc1C(OCc1ccc(C1)cc1Cl)Cn1ccnc1  
 S1[C@H]2N(C(C(=O)[O-])=C(C1)COC(=O)N)C(=O)[C@H]2NC(=O)\C(=N\OC)\c1occc1  
 Ic1cc(cc(I)c1OCC[NH+](CC)CC)C(=O)c1c2c(oc1CCCC)cccc2  
 Clc1cc2S(=O)(=O)N=C(Nc2cc1)C  
 O=C(NC(=O)N)Cc1cccc1  
 Clc1cccc1C[N+](CCNC(=O)C(=O)NCC[N+](Cc1cccc1Cl)(CC)CC)CC)CC  
 O(C)c1ccc(cc1)C1C(=O)c2c(cccc2)C1=O  
 FC(F)(F)c1ccc(cc1NC(=O)[C@H]1CC[C@H]2[C@H]3C(CC[C@]12C)[C@@]1([C@H](NC(=O)C=C1)CC3)C)C(F)(F)  
 F  
 Clc1cc(C1)ccc1C(OCc1ccc(C1)cc1)Cn1ccnc1  
 S(=O)(=O)(C[C@](O)(C(=O)Nc1cc(C(F)(F)F)c(cc1)C#N)C)c1ccc(F)cc1  
 O(C(OC)=O)C1(CCC2C3C(C4(C(=CC(=O)C=C4)CC3)C)C(O)CC12C)C(=O)COC(=O)CC  
 O(CC[NH2+])CC(O)C0c1c2c3c([nH]c2ccc1)cccc3)c1cccc1OC  
 S1[C@H]2N(C(C(=O)[O-])=C(C1)COC(=O)C)C(=O)[C@H]2NC(=O)CSc1ccncc1  
 O1c2c(cccc2C(OC[NH+])2CCCC2)=O)C(=O)C(C)=C1c1cccc1  
 S1[C@H]2N(C(C(=O)[O-])=C(C1)\C=C\C)C(=O)[C@H]2NC(=O)[C@H]([NH3+])c1ccc(O)cc1  
 [NH2+](CCCn1c2c(Cc3c1cccc3)cccc2)C  
 Clc1cc(C1)ccc1C(OCc1c2c(sc1)c(C1)ccc2)Cn1ccnc1  
 S=C1NC(=O)C(C(CCC)C)(CC=C)C(=O)N1  
 Fc1cc2c(nc1N1CC(C[NH3+])/C(=N\OC)/C1)N(C=C(C(=O)[O-])C2=O)C1CC1  
 O[C@H]1C[C@@H](O)[C@H](\C=C\C[C@@H](O)CCCC)[C@H]1C\C=C/C/CCCC(=O)[O-]  
 Clc1cc(N)ccc1C(OC[NH+](CC)CC)=O  
 S1[C@H]2N([C@H](C(=O)[O-])C1(C)C)C(=O)[C@H]2\N=C\N1CCCCC1  
 Fc1cc2c3N(C=C(C(=O)[O-])C2=O)C(COC3c1N1CC[NH+](CC1)C)C  
 Clc1cc(C1)ccc1[C@@]1(O[C@H](CO1)COC1ccc(N2CCN(CC2)c2ccc(N3C=NN(C(C)C)C3=O)cc2)cc1)Cn1nnc1  
 O1[C@H](C[NH3+])[C@@H](O)[C@H](O)[C@@H](O)[C@H]1O[C@H]1[C@H](O)[C@@H](O[C@H]2O[C@H](CO)[C@@H]  
 )O)[C@H]([NH3+])[C@H]2O)[C@H]([NH3+])C[C@@H]1[NH3+]  
 O=C1NC(=O)NC(=O)C1(CC)c1cccc1  
 Fc1ccc(cc1)[C@@]1(OCc2cc(ccc12)C#N)CCC[NH+](C)C  
 O1[C@@H](C)[C@@H](O)[C@@H]([NH3+])C[C@@H]1O[C@@H]1c2c(C[C@](O)(C1)C(=O)C)c(O)c1c(C(=O)c3c(cc  
 cc3)C1=O)c2O  
 Clc1ccc(cc1)C1S(=O)(=O)CCC(=O)N1C  
 O(C)c1c(OC)cc(cc1OC)C=CC(O[C@@H]1C[C@H]2[C@H](C[C@H]3[NH+](CCc4c5c([nH]c34)cc(OC)cc5)C2)[C@H]  
 ](C(OC)=O)[C@H]1OC)=O  
 O1[C@@H]2[C@]34CC[NH+](C[C@H](Cc5c3c1c(O)cc5)[C@]4(O)CCC2=O)CC=C  
 F[C@@]12[C@H]([C@@H]3CC[C@@](O)(C)[C@]3(C[C@@H]1O)C)CCC1=CC(=O)CC[C@@]12C  
 S(C[C@@H]1C[C@H]2[C@H]([NH+](C1)CCC)Cc1c3c2cccc3[nH]c1)C  
 Ic1cccc1C(CCCCCCCC(OC)=O)C  
 O1[C@@H]2[C@]34CC[NH+](C[C@H](Cc5c3c1c(O)cc5)[C@]4(O)CCC2=O)C  
 O(CC(O)C[NH2+]C(C)C)c1ccc(NC(=O)CCC)cc1C(=O)C

SC[C@H] (C(=O)N1CCC[C@H]1C(=O)[O-])C  
 BrCl[nH]c2c3c1c[C@H]1[NH+] (C[C@@H] (C=C1c3ccc2)C(=O)N[C@@]1(O[C@]2(O)N([C@@H] (CC(C)C)C(=O)N3[C@H]2CCC3)C1=O)C(C)C)C  
 C1CCN(N=O)C(=O)NC1CCCC1  
 FC(F)(F)c1cc(ccc1)\C(=N/OCCCC(=O)[O-])\c1cccnc1  
 Fc1c(N2C[C@H]([NH2+][C@H](C2)C)C)c(F)c2N(C=C(C(=O)[O-])C(=O)c2c1N)C1CC1  
 O1[C@@H](CC)[C@](O)(C)[C@H](O)[C@H](C)C(=O)[C@@H](C[C@]1(OC)(C)[C@H](O[C@@H]2O[C@@H](C[C@H]([NH+](C)C)[C@H]2O)C)[C@@H](C)[C@H](O[C@]1(OC)(C2)C)[C@@H](C)C1=O)C  
 O(C(=O)C)c1c(C)c(C)c(OCC(O)C[NH2+])C(C)C)cc1C  
 O=C1N[C@@H]2CC[C@H]3[C@@H]4CC[C@H](C(=O)NC(C)C)C[C@]4(CC[C@@H]3[C@]2(C=C1)C)C  
 n1cn(nc1)Cclcc(cc(c1)C(C#N)(C)C)C(C#N)(C)C  
 o1c(ccc1C=NN1CC(=O)NC1=O)-c1ccc([N+](=O)[O-])cc1  
 O1[C@@]2([C@H](O[C@@H]1CCC)C[C@H]1[C@H]3[C@@H]([C@@]4(C(=CC(=O)C=C4)CC3)C)[C@@H](O)C[C@@]12C)C(=O)CO  
 O=C1N(C)C(=O)N(c2nc[nH]c12)C  
 O([C@H](C(C[C@@H]([NH+](C)C)C)(c1cccc1)c1cccc1)CC)C(=O)C  
 FC(F)(F)C(OCF)C(F)(F)F  
 Clc1c(N2CC[NH+](CC2)CCCCO)c2cc3NC(=O)CCc3cc2)cccc1C1  
 S1c2c(N(c3c1ccc3)CC(C[NH+](C)C)C)cccc2  
 o1nc(cc1C)C(=O)NNC1cccc1  
 S(=O)([O-])(=NC(=O)NC1CCCC1)c1ccc(cc1)CCN1C(=O)C(c2c(cc(OC)cc2)C1=O)(C)C  
 OC[C@@H](NC(=O)[C@@H]1C=C2[C@H]([NH+](C1)C)Cc1c3c2cccc3[nH]c1)C  
 Clc1cccc(C)c1NC(O)C)clsc(nc1)Nc1nc(nc(N2CC[NH+](CC2)CO)C1)C  
 Clc1cc(Nc2nnc3c2cc(cc3)-c2oc(cc2)C[NH2+])CCS(=O)(=O)C)cccc1OCc1cc(F)ccc1  
 O1[C@@]2([C@H](OC1(C)C)C[C@H]1[C@H]3[C@@H]([C@@]4(C(=CC(=O)C=C4)CC3)C)[C@@H](O)C[C@@]12C)C(=O)CO  
 O(C)c1ccc(cc1)C[C@H]([NH2+][C@H](O)c1cc(NC=O)c(O)cc1)C  
 S1c[C@H](NC(=O)[C@@H](NC(=O)[C@@H](NC(=O)[C@@H](N(C)C(=O)CCC1)Cc1ccc(O)cc1)[C@H]([CC)C)CCC(=O)N)CC(=O)N)C(=O)N1CCC[C@H]1C(=O)N[C@@H](CC(C)C)C(=O)NCC(=O)N  
 Clc1cccc(F)c1Nc1ccc(cc1CC(=O)[O-])C  
 Oc1ccc(nc1CO)C(O)C[NH2+])C(C)C)C  
 [BiH]10C(=O)c2c(O1)cccc2  
 O(C)c1cc(ccc1OC)CC[NH2+])CC(O)COc1cc(ccc1)C  
 O1[C@H](CO)[C@@H](O)[C@H](O)[C@@H]([NH3+])C1O  
 S(=O)(=O)(Nc1ncnc(OC)c1OC)c1ccc(N)cc1  
 Oc1c2c(ccc1)[C@@](O)([C@@H]1C(C(=O)[C@@]3(O)[C@@H](C1)[C@H]([NH+](C)C)C(=O)/C(=C([O-]))\NC[NH+]1CCCC1)/C3=O)=C2[O-])C  
 O=C1N(C)C([O-])=C2N=CN=C2N1C  
 S(=O)(=O)(N(C)C)C[C@H](OP(=O)([O-])[O-])[C@@H](NC(O[C@H]1CCOC1)=O)Cc1cccc1)c1ccc(N)cc1  
 O1[C@@H](C\C=C\C=C)[C@H](O)[C@@H](C[C@H](CC=O)[C@H](O[C@@H]2O[C@H](C)[C@@H](O[C@@H]3O[C@@H](C)[C@H](OC(=O)CC(C)C)[C@](O)(C3)C)[C@H]([NH+](C)C)[C@H]2O)[C@@H](OC)[C@H](OC(=O)C)CC1=O)C)C  
 Clc1cc2NC(N(S(=O)(=O)c2cc1S(=O)(=O)N)C)CSCC(F)(F)F  
 Clc1cc2NC(NC(=O)c2cc1S(=O)(=O)N)CC  
 S1[C@H]2N(C(C(=O)[O-])=C(C1)CSclnnnn1)C(=O)[C@H]2NC(=O)[C@H](O)c1cccc1  
 S1[C@H]2N(C(C(=O)[O-])=C(C1)CSclnnnn1)C(=O)[C@H]2NC(=O)C(NC(=O)N1CCN(CC)C(=O)C1=O)c1ccc(O)cc1  
 S1C(SC1=C(C(=O)N)C(=O)[O-])C(=O)N[C@@]1(OC)C2SCC(CSc3nnnn3C)=C(N2C1=O)C(=O)[O-]  
 slcc(nc1N)/C(=N)OC)/C(=O)N[C@H]1[C@H]2SCC=C(N2C1=O)C(=O)[O-]  
 O1c2cc(C[C@H]3[N+](CCc4cc(OC)c(OC)c(Oc5ccc(C[C@@H]6[N+](CCc7cc(OC)c1cc67)(C)C)cc5)c34)(C)C)cc2OC  
 O(C(=O)C)[C@@H]1[C@@]2([C@H]([C@H]3[C@H](CC2)[C@@]2([C@H](C[C@H](OC(=O)C)[C@@H]([N+]4(CCCCC4)C)C2)CC3)C)C[C@@H]1[N+]1(CCCCC1)C)C  
 O(C(=O)C)[C@@H]1[C@@]2([C@H]([C@H]3[C@H](CC2)[C@@]2([C@H](C[C@H](OC(=O)C)[C@@H]([NH+]4CCCC4)C)C2)CC3)C)C[C@@H]1[N+]1(CCCCC1)C)C  
 BrClc2cc(ccc2oc1-c1cccc1NS(=O)(=O)C(F)(F)F)Cn1c(C(=O)N)c(nc1CC)C1CC1  
 S1CCSC12C[C@H](N(C2)C(=O)[C@@H]([NH2+][C@@H](CCc1cccc1)C(OC)C)C(=O)[O-]  
 O=C1NC(=O)NC(=O)C1(CCC(C)C)CC  
 O=C1NC([O-])=NC(=O)C1(C(C)C)CC=C  
 O=C1NC(=O)NC(=O)C1(CCCC)CC  
 O=C1N(C)C(=O)NC(=O)C1(C)C=1CCCC=1  
 [Li+]  
 O(C)c1cc2CC[C@H]3[C@@H]4CC[C@@](O)(C#C)[C@]4(CC[C@@H]3c2cc1)C  
 O(C[C@@H](O)C[NH2+])C(C)C)c1cccc1C1CCCC1  
 O1[C@H](C)[C@H](C)[C@H](OC(=O)C)[C@@H](C)C(=O)[C@@]2(OC2)C[C@H](C)[C@H](O[C@@H]2O[C@@H](C[C@H]([NH+](C)C)[C@H]2OC(=O)C)C)[C@@H](C)[C@H](O[C@@H]2O[C@@H](C)[C@H](OC(=O)C)[C@@H](OC)C2)[C@@H](C)C1=O  
 Ic1c(C(=O)NCC(O)CO)c(I)c(N(C(=O)C)CC(O)CO)c(I)c1C(=O)NCC(O)CO  
 O[C@@H]([C@@H]([NH2+])C)C)c1cccc1  
 Oc1c2NC(=O)C=Cc2c(cc1)[C@@H](O)[C@@H]([NH2+])C(C)C)CC  
 [NH2+](CC#C)[C@@H]1CCc2c1cccc2  
 [MgH2-]O

S(=O)(=O)(Nc1ncc(OCCOC)cn1)c1cccc1  
F[C@@H]1C2=CC(=O)C=C[C@@]2([C@@H]2[C@H]([C@@H]3C[C@@H](C)[C@](O)(C(=O)CO)[C@]3(C[C@@H]2O)C)C1)C  
O=C([O-])[O-]  
O1[C@]2([C@@H]3[C@H]([C@H]4[C@H]5[C@H](CC[C@]24C)[C@]2(CCC(=O)C=C2[C@H]2[C@@H]5C2)C)C3)CCC1=O  
O1CC(=CC1=O)[C@H]1CC[C@]2(O)[C@H]3[C@H](CC[C@]12C)[C@@]1([C@@H](C[C@@H](O[C@@H]2O[C@H](C)[C@@H](O[C@@H]4O[C@H](C)[C@@H](O[C@@H]5O[C@H](C)[C@@H](O)[C@@H](O)C5)[C@@H](O)C4)[C@@H](O)C2)CC1)CC3)C  
O(C(=O)c1cccc10)c1cccc1C(=O)[O-]  
O(C(=O)N(C)C)c1cc([N+](C)(C)C)ccc1  
[BiH]1OC(=O)c2c(O1)cccc2  
S1c2c(N(c3c1cccc3)C[C@@H](C[NH+](C)C)C)cc(OC)cc2  
O1[C@@]2([C@H](OC1C1CCCC1)C[C@H]1[C@H]3[C@@H]([C@@]4(C(=CC(=O)C=C4)CC3)C)[C@@H](O)C[C@@]12C)C(=O)COC(=O)C(C)C  
O1c2c(cccc2)C(=O)C(C(CC(=O)C)c2ccc([N+](=O)[O-])cc2)=C1[O-]  
O=C1CC[C@@]2([C@@H]3[C@H]([C@@H]4CC[C@H](OC(=O)CC)[C@]4(CC3)C)CCC2=C1)C  
O1[C@@H](C[NH3+])[C@@H](O)[C@H](O)[C@@H]([NH3+])[C@H]1O[C@H]1[C@@H](O)[C@@H](O[C@@H]1CO)O[C@H]1[C@H](O[C@H]2O[C@H](CO)[C@@H](O)[C@H](O)[C@H]2[NH3+])[C@@H]([NH3+])C[C@@H]([NH3+])[C@@H]1O  
O=C1N(N(C)C)C=C1N(C)C)c1cccc1  
O(C)c1cc2n[nH]nc2cc1C(=O)NCC1[NH+](CCC1)CC=C  
O(C)c1cc(O)c(cc1)C(=O)c1cccc1  
O[C@]1(CC[C@H]2[C@H]3[C@@H]([C@@H]4C(CC3)=CCCC4)CC[C@]12C)CC=C  
O(C(C(CC([NH+](C)C)C)(c1cccc1)c1cccc1)CC)C(=O)C  
O[C@H]1C[C@H](O)C\C(=C\C=C/2\C@@H]3CC[C@H]([C@@H](CCCC(C)C)C)[C@]3(CCC\2)C)\C1=C  
O=C1NC(=O)CCC1(CC)c1cccc1  
n1c(N)c(N=Nc2cccc2)ccc1N  
Fc1cccc1C1=NCC(=O)N(c2c1cc([N+](=O)[O-])cc2)C  
BrC1cc2c(NC(=O)CN=C2c2ncccc2)cc1  
Clc1cccc1C1=NCC(=O)N(c2sc(cc12)CC)C  
O1CC[NH+](C)C(C)Clc1cccc1  
O(CC(O)C[NH2+])C(C)C)c1cccc1OCC=C  
S(=O)(=O)(Nc1nc(cc(n1)C)C)c1ccc(N)cc1  
Clc1cc2c(N(C)C(=O)CN3C2(OC(=CC3=O)C)c2cccc2)cc1  
O1[C@@H](CC(=O)[C@@H](\C=C(\C)/[C@@H](O)[C@@H](OC)C(=O)[C@@H](C[C@@H](\C=C\C=C/C=C(/C)\[C@@H](OC)C[C@H]2O[C@](O)([C@@H](CC2)C)C(=O)C(=O)N2[C@@H](CCCC2)C1=O)C)C)[C@@H](C[C@H]1C[C@@H](OC)[C@H](OCCO)CC1)C  
[Zn]  
S(C(Sc1cc(C(C)(C)C)c(O)c(c1)C(C)(C)C)C)C)c1cc(C(C)(C)C)c(O)c(c1)C(C)(C)C  
O(CC(=O)N[C@@H]([C@@H](O)C[C@@H](NC(=O)[C@@H](N1CCNC1=O)C(C)C)Cc1cccc1)Cc1cccc1)c1c(cccc1C)C  
S1[C@H]2N([C@@H](C(OCOC(=O)C(C)(C)C)=O)C1(C)C)C(=O)[C@H]2NC(=O)[C@H]([NH3+])c1cccc1  
S1[C@H]2N(C(C(OCOC(=O)C(C)(C)C)=O)C1(C)C)C(=O)[C@H]2N=C\N1CCCCC1  
O=C/1C=CC=C\C\1=C/1\N\C(\NN\1c1ccc(cc1)C(=O)[O-])=C\1/C=CC=CC/1=O  
O=C1N=C(Nc2n(cnc12)COC(COC(=O)[C@@H]([NH3+])C(C)C)CO)N  
Clc1cc2[nH+]ccc(NC(CCC[NH+](CCO)CC)C)c2cc1  
O([N+](=O)[O-])C(C(O[N+](=O)[O-])CO[N+](=O)[O-])CO[N+](=O)[O-]  
S1c2c(N(c3c1cccc3)CCC[NH+](C)C)cc(cc2)C(=O)C  
S1c2c(N(c3c1cccc3)CC([NH+](C)C)C)cc(cc2)C(=O)C  
[NH+](CCC(c1cccc1)c1ncccc1)C)C  
S1c2c(cc(S(=O)(=O)N(C)C)cc2)\C(\c2c1cccc2)=C/CC[NH+]1CC[NH+](CC1)C  
Clc1cc\2c(Sc3c(cccc3)/C/2=C/CC[NH+]2CC[NH+](CC2)CCO)cc1  
O=C(N)C(CC[N+](C)C)C(C)C(C)C(c1cccc1)c1cccc1  
S(C)[C@H]1O[C@H]([C@H](NC(=O)C2[NH+](C[C@@H](C2)CCC)C)[C@H](O)C)[C@H](O)[C@H](O)[C@H]1O  
Clc1cc(c(nc1)-c1ccc(nc1)C)-c1ccc(S(=O)(=O)C)cc1  
S(=O)(=O)(CC[NH+](CC)CC)C1C2N(CC1)C(=O)c1nc(oc1)CC(=O)CC(O)\C=C(/C=C\CNC(=O)\C=C/C(C)C(OC2=O)C(C)C)\C  
O=C(Nc1cccc1)CCCCC(=O)N[O-]  
O(C(=O)C)[C@@H]/1C[C@]2([C@@H](C[C@@H](O)[C@@H]3[C@@]2(CC[C@H]2[C@H](C)[C@H](O)CC[C@@]23C)C)\C\1=C(/CCC=C(C)C)\C(=O)[O-])C  
S(CC=1CO[C@H]2N(C=1C(=O)[O-])C(=O)[C@@]2(OC)NC(=O)C(C(=O)[O-])c1ccc(O)cc1)c1nnnn1C  
Oc1cc2CC[C@H]3[C@@H]4C[C@@H](O)[C@H](O)[C@]4(CC[C@@H]3c2cc1)C  
S(OC1cc2CC[C@H]3[C@@H]4CCC(=O)[C@]4(CC[C@@H]3c2cc1)C(=O)(=O)[O-]  
O(C1CCCC1)c1cc2CC[C@H]3[C@@H]4CC[C@@]4(O)(C#C)[C@]4(CC[C@@H]3c2cc1)C  
n1ccn(c1)C(c1ccc(cc1)-c1cccc1)c1cccc1  
Clc1cccc1C(O)CC[NH+](C)C)c1cccc1  
ClC=1C2=CC(=O)[C@H]3[C@H](C3)[C@@]2([C@@H]2[C@H]([C@@H]3CC[C@](O)(C(=O)C)[C@]3(CC2)C)C=1)C  
Fc1ccc(cc1)C(CCC[NH+]1CCC2(N(CNC2=O)c2cccc2)CC1)c1ccc(F)cc1  
s1cc(nc1C)\C=C(/C)\[C@@H]1NC(=O)C[C@@H](O)C(C)(C)C(=O)[C@@H](C)[C@@H](O)[C@H](CCC[C@]2(O[C@H]2C1)C)C

Fc1cc2CCC (Oc2cc1) C (O) C [NH2+] CC (O) C1Oc2c (cc (F) cc2) CC1  
 FC (F) (F) c1cc (NC (=O) c2cc (Nc3nc (ccn3) -c3cccnc3) c (cc2) C) cc (-n2cc (nc2) C) c1  
 OC12CC3 ( [NH2+] CC (=O) N4CCC [C@H] 4C#N) CC (C1) CC (C3) C2  
 S (C) c1ccc (cc1) C (=O) C=1NC (=O) NC=1C  
 O (C (=O) C [NH2+] [C@H] (C (=O) N1CC [C@H] 1C (=O) NCc1ccc (cc1) /C (=N/O) /N) C1CCCC1) CC  
 C1C (C1) =CC1C (C) (C) C1C (OCc1cc (Oc2ccccc2) ccc1) =O  
 O=C (Nc1cc2c (cc1) C (CCC2 (C) C) (C) C) c1ccc (cc1) C (=O) [O-]  
 Clc1cccc (Cl) c1OC (C) C1=[NH+] CCN1  
 S (=O) ([O-]) (=Nc1ncccc1) c1ccc (N) cc1  
 O=C1N (C) C (=O) CC1 (C) c1cccc1  
 O=[N+] ([O-]) [O-]  
 S (=O) (=O) ([O-]) c1cc2c (cc1C (C) C) CC [C@H] 1 [C@@] (CCC [C@@] 12C) (C (=O) [O-]) C  
 O=C (C (C) C) c1c2n (nc1C (C) C) C=CC=C2  
 [Cl+] ([O-]) [O-]  
 ClC12C (C3CC (C) C (O) (C (=O) CO) C3 (CC1O) C) CCC1=CC (=O) C=CC12C  
 Fc1cccc (F) c1Cn1nnc (c1) C (=O) N  
 S ([C@H] 1C [C@H] ([NH2+] C1) CNS (=O) (=O) N) C=1 [C@H] ([C@H] 2N (C=1C (=O) [O-]) C (=O) [C@@H] 2 [C@H] (O) C) C  
 O=C (N (C1CC [NH+] (CC1) CCc1cccc1) c1cccc1) CC  
 P (=O) ([O-]) ([O-]) C (P (=O) ([O-]) [O-]) [NH2+] C1CCCCC1  
 Oc1cc (ccc1O) [C@H] (O) [C@@H] ([NH3+]) C (=O) [O-]  
 Clc1cc (Cl) ccc1Cn1nc (c2c1cccc2) C (=O) [O-]  
 S (=O) (=O) (NCCC1 [NH+] (CCC1) C) c1cc (C2=NC (=O) c3n (nc (c3N2) CCC) C) c (OCCC) cc1  
 o1cccc1CNC (=O) c1cccc1N (C (=O) COc1cccc1) C

## SMILES of Chembridge Screening Library

O=C1N(CC(C1)c1cccc1)CC(=O)N1[C@H]2[C@H](CCC1)C[NH+](CC2)CCc1cccc1  
S(CC(=O)N1CCC([NH+])2CCC(CC2)C(=O)NCCc2cccc2)CC1)C  
o1nc(cc1COc1ccc(cc1)C(=O)C)C(=O)N1CCCC1  
S(=O)(=O)(C)c1ncc(n1CCOC)C[NH+]1CC(OCc2ncccc2)CCC1  
Fc1cccc1C[NH+]1CCC(CC1)CN(CC1OCCC1)C(=O)CCn1nnnc1  
s1c(ccc1C)-c1cc(OCc2CCC[NH+](C2)C)c2OCCN(Cc2c1)C(=O)C1CCCC1  
O(C)c1cccc(C[NH+])2CC([NH+](CC2)Cc2cccc2)CCO)c1O  
Fc1cc(F)ccc1\C=C\C(=O)N1CCC2(CC2C(=O)NC2CCN(CC2)C(OCC)=O)CC1  
Oc1cc(ccc1)C[NH+]1CCC(CC1)C1(NC(=O)N(CC#CC)C1=O)CCc1cccc1  
O=C1N(CC(CC1)C(=O)NCCCc1ccnc1)C1CCCCC1  
O(CCNC(=O)c1cc2c(nc2)cc1)c1ccnc1  
o1c(ccc1C[NH+])1CC(CCC1)c1[nH]ncc1-c1ccc(cc1)C)CC  
FC(F)(F)C(NC(=O)c1cnn(c1C)-c1nc2-c3c(CCCc2cn1)cccc3)c1ccnc1  
O(C)c1nc(OC)ccc1C(=O)N1CCc2n(CC1)cnn2  
Fc1cc(ccc1)CC[NH+]1CC(CCC1)C[NH+](Cc1ccc(NC(=O)C)cc1)CC  
s1cc(c2c1cccc2)-c1cc(OC)c2OCCN(Cc2c1)C(=O)c1occc1  
O(C)c1ccc(cc1)CN1C(CC)=C(C(=O)N2CCN(CC2)c2ncccc2)C(=O)C=C1C  
s1cc2c(CCCC)c1C(=O)N1CCC2(CC2C(=O)N2CC[NH+](CC2)Cc2cc(F)ccc2)CC1  
Clc1cccc1C[NH+]1CCc2n(CC1)c(nn2)CNC(=O)c1cc(oc1C)C  
o1nc(nc1C[NH+])1CC[NH+](CC1)Cc1cc2OCOc2cc1)-c1cccc1  
Fc1ccc(OC)cc1C[NH+]1Cc2cc(ccc2OCC1)C[NH+]1CCC(Oc2ccnc2)CC1  
Fc1cc(ccc1)-c1nc(nnc1)NCCC=1CCCC=1  
s1c(nc1N(C)C)C[NH+](CC1CCC[NH+](C1)CCc1cc(F)ccc1)CC  
O=C(NC(C(C)C)C)Cn1ccnc1)c1nnn(c1)\C=C\c1cccc1  
O1C(CCC12CCN(CC2)C(=O)C1CC1)CNC(=O)c1ccc(cc1)C=C  
S(=O)(=O)(Nc1cc(cc(c1)C(OC)=O)CNC(=O)Cc1[nH]nc(n1)C)c1ccc(F)cc1  
o1c(nnc1CCC(=O)N(Cc1cccc1)CCc1cccc1)-c1noc(c1)C  
O=C(N1CCc2c(C1)cccc2)c1nn(c2c1CC([NH2+])CC=C)CC2)C  
o1c(ccc1C)C[NH+]1CC([NH+](CC1)C1CCCC1)CCO  
o1cccc1CNC(=O)C1=C2N(CC[NH+](CC2)Cc2cc(OC)c(OC)cc2)C(=O)C=C1OC  
s1cc(cc1C(=O)C)C(=O)N1CC(CCC1)C(=O)c1cc2c(cc(OC)cc2)cc1  
O=C1N(CC[NH+](C)C)C(=O)NC1(CCC(C)C)C1CCN(CC1)C(=O)c1[nH]c2c(c1)cccc2  
ClC1=NN(CC(=O)N(CC2CC[NH+](CC2)C2CCCC2)CC2OCC2)C(=O)C=C1  
[NH+](CC1CC[NH+](CC1)Cc1cccc1C)C(Cc1ccnc1)CCC  
s1c(ccc1C[NH+]1CCC(CC1)C(=O)Nc1ccc(cc1)-c1cc(ccc1)C)C#CCO  
Fc1ccc(OCc2occc(n2)C(=O)NC(Cc2ncnc2)C)cc1  
s1cccc1\C=C\C(=O)NCC1Oc2c(C1)cccc2-c1ccc(S(=O)(=O)C)cc1  
s1cc(nc1C)C(=O)N1[C@H]2[C@H](CCC1)CN(CC2)C(=O)Cc1cc(OC)ccc1  
Clc1cc(ccc1)-c1oc(C)c(n1)C[NH+]1CC[NH+](CC1)Cc1ccnc1  
O1CCC(CC1)C(=O)N(CC1CC[NH+](CC1)C1CCCC1)Cc1ccnc1  
s1cc(cc1)CC([NH2+])C1CCN(CC1)c1nc(c2c(n1)cc(OC)cc2)C)C  
Fc1ccc(N2CCN(CC2)C(=O)C2=CN3CCc4c3c(ccc4)C2=O)cc1  
O1CC[NH+](Cc2cc(ccc12)C[NH+]1CCC(O)(CC1)c1ccnc1)Cc1cc(OC)cc(OC)c1  
s1c2c(cc1C(=O)N1CC([NH+])3CCN(CC3)c3cccc3)CCC1)cccc2  
O1C(CCC12CC[NH+](CC2)Cc1ccc(cc1)C(C)C)CNC(=O)c1nn(cc1)C  
FC(F)(F)c1cc(N2CC[NH+](CC2)[C@H]2CC[NH+](C[C@H]2)2CCC(=O)NCc2ccc(OC)cc2)Cc2cccc2)ccc1  
Fc1cc2N(CC[NH+]3CCCC3)C(=O)C(=Cc2cc1)C[NH2+])Cc1ccc(OC)cc1  
s1cc(cc1)[C@H]1[NH+]2[C@H]3([C@H](C1)CN(Cc1cc(OC)ccc1)C3=O)CCC2  
O(CC)c1cccc1C[NH+]1CC[NH+](CC1CCO)Cc1cc(OC)ccc1OC  
Clc1cc2C=C(COc2cc1)CNc1nn(nn1)CC  
S(C)c1nnc(n1-c1ccc(OC)cc1)CCNC(=O)c1ccoc1  
s1cc(cc1)CNC(=O)CCc1oc(nn1)CCc1cccc1  
o1c(ccc1CO)C(=O)N1CCC(CC1)C(N(C(=O)Cn1ncccc1)C)Cc1cccc1C  
Clc1ccc(cc1)C1(CC1)C(=O)N(Cc1cc2c(nc1N(C)C)c(OC)ccc2OC)CCC1CCCC1=O  
O=C(NC(C)C)c1cnn(c1C)-c1c2c(ccc1)cccc2)CCn1nnnc1  
S1CCN(CC1)C(=O)C1=C2N(CC[NH+](CC2)Cc2n3C=CSc3nc2C)C(=O)C=C1OC  
s1cccc1C[NH+]1C[C@H](n2nnc(c2)C(OC)=O)C[C@H]1C(=O)NCCC1ccc(F)cc1  
Fc1cc(OC)c(cc1)C[NH+]1CCC(n2nccc2NC(=O)c2ccnc2)CC1  
O=C1N([C@H]2[C@H](CC1)C[NH+](CC2)Cc1cc(ccc1)C)CCCC  
O(C(=O)C1(CCN(CC1)C(=O)c1ccnc1C)CCCc1cccc1)CC  
s1cc(nc1C[NH+])1CCc2n(CC1)c(nn2)CCc1cccc1)-c1cccc1  
o1nc(nc1-c1cccc1N1CCC(=O)NC1=O)C(C)C)C  
S1C=C(n2cc(nc12)-c1ccc(cc1)C)C(=O)N1CCCCC1  
O(C)c1cc(ccc1OC)C(=O)N(Cc1ccc(OCc2ncccc2)cc1)[C@H]1CCCCNC1=O  
s1c2CC([NH2+])Cc3cc(ccc3)C)CCc2c2c1N=CN(CC[NH+](C)C)C2=O  
O(C(=O)c1n(c2ncc(NC3CCN(CC3)C(=O)C)cc2c1NC(=O)COC)C)C  
Fc1ccc(cc1)-c1nn(cc1C[NH+](C)C1CCOCC1)-c1ccc(cc1)C

O (C) c1c (cc (cc1C) C (=O) C1CCCN (C1) C (=O) c1cc (-n2nccc2) ccc1) C  
S (CC (=O) NCc1nc (oc1C) -c1cccc1NC (=O) C1CCC1) c1ncccc1  
S (CCOc1cccc1) c1nnc (n1-c1cc (ccc1) C (F) (F) F) CNC (=O) C (C) C  
s1c2CC [NH+] (Cc2cc1) Cc1cc (OC) c (OCC (O) C [NH+] (CC) CC) cc1  
Clc1cc2 [nH] c (nc2cc1) CNC (=O) C1=CN (C=C (C (=O) NCC2CCCC2) C1=O) C1CC1  
Clc1cccc1CNC (=O) C1=CC=C (NC1=O) C [NH+] (CC (O) c1cccc1) C  
s1cccc1C (=O) NCC1CCC [NH+] (C1) Cc1 [nH] nc (c1) C  
O=C1N (CCC [NH+] (C) C) C (=O) NC1 (Cc1cccc1C) C1CCN (CC1) C (=O) c1cccc1C  
o1nc (C) c (CCC (=O) N2Cc3c (n (nc3C (OCC) =O) CC (C) C) CC2) c1C  
O (C) c1cccc1C [NH+] 1CCC (CC1) C [NH+] (Cc1nccn1C) CC (C) C  
O1CCC (NC (=O) C2CCN (CC2) c2nc (nc3c2CCC3) -c2cccc2) CC1 (C) C  
O1CCC (CC1) CN1CC (OCc2ncccc2) C [NH+] (CC1=O) C (Cc1cccc1OC) C  
O (C) c1cccc1CCNC (=O) [C@H] 1 [NH+] (C [C@H] (n2nnc2) C1) Cc1ccc (OCc2cccc2) cc1  
S (=O) (=O) (N1CCCC1) c1cc (cc (NCc2 [nH] cnc2C) c1) C (=O) NCc1ccc (OC) cc1  
O1c2cc (ccc2OC1) C (CC (=O) NCc1 [nH] c (nn1) C) c1cccc1  
O (Cc1nnc (c1) CC1CCN (CC1) c1nc (NC) ccn1) C  
[NH3+] CCn1c2c (cc1C) cccc2  
S (C (CC ([NH+] 1CCC (CC1) CCC (=O) NC1CC1) C) (C) C) C  
O=C1N (Cc2ccnc2) C (=O) CC1 (CC (=O) N1CCN (CC1) c1cccc1) c1cccc1  
Fc1cc (F) ccc1Cc1nc (on1) -c1ocnc1C  
O (C) c1cc (ccc1) CC (=O) NC1CCC [NH+] (C1) CC1CCCC1  
[NH2+] (C1CC [NH+] (CC1) CC) C1CCCc2n (ncc12) -c1cc (C) c (cc1) C  
O=C1N (CCc2cccc2) C (=O) N (C) C12CC [NH+] (CC2) Cc1ccnc1  
[nH] 1c2c (nc1C (C) c1cccc1) n (nc2C (C) C) C  
Fc1cc (ccc1F) CN1CCCC (O) (C [NH+] 2CC [NH+] (CC2) C (C) C) C1=O  
S (CC (=O) N [C@H] 1c2c (cccc2) C2 (CC [NH+] (CC2) Cc2cc (OC) c3OCoc3c2) [C@H] 1OC) C  
o1nc (cc1CC1 (O) CC [NH+] (CC1) CC=C (C) C) -c1cccc1  
Fc1cc2cc ([nH] c2cc1) C (=O) N1CCC (=O) N (CC1) Cc1cc (OC) ccc1  
o1cccc1\C=C\C [NH+] 1Cc2cc (ccc2OCC1) C [NH+] 1CCC (O) CC1  
O1CC [NH+] (CC1) CCCN1CC (CCC1=O) C (=O) N1CCC (CC1) C (=O) c1cccc1  
O (C) c1cccc1CC [NH+] 1CCC (CC1) CN (C (=O) c1ncccc1) C  
O (CC) c1ccc (cc1) C [NH+] (CC1CC [NH+] (CC1) C1CCCC1) Cc1ccnc1  
Clc1ccc (cc1) CCN1CC (CCC1=O) C (=O) NC (CC) CC  
O1c2cc (ccc2OC1) -c1n [nH] cc1C [NH+] 1CCc2nc [nH] c2C1c1ncccc1  
O (C) c1cc (ccc1) -c1nn (cc1C [NH+] 1CCC ([NH+] 2CCCC2) CC1) -c1cccc1  
[NH2+] (CC (C) C) C1CCCc2n (ncc12) -c1ncccc1  
O (C) c1cc (cc (OC) c1) C [NH+] 1CCNC (=O) C1CC (=O) NCC1CC1  
Clc1cc (C) c (OC (C (=O) N2 [C@H] 3 [C@H] (CCC2) CN (CC3) C (=O) C) C) Cc1  
S1CCN (CC1) c1nc2nnc2nc1N1CCC ([NH+] 2CCCC2) CC1  
O1c2cc (ccc2OC1) C (CC (=O) NCC (C) =C) c1cccc1  
s1cc (nc1C (=O) N (Cc1cn (nc1) C) C (C) C) C (C) C  
s1cccc1C [NH+] 1CC [NH+] (CC1CCO) Cc1ccc (Oc2ncccn2) cc1  
O=Cc1cc2C3c4c (C (c2cc1) c1c3cccc1) cccc4  
BrC=1C (Oc2c (cccc2) C=1 [O-]) =O  
O (C) c1ccc (cc1) C (=O) NC (Cc1c2c ([nH] c1) cccc2) C  
O (C) c1ccc (OC) cc1N\N=C\1/CCCNC/1=O  
Br1c2oc (C (OCC [NH+] (CC) CC) =O) c (c2cc (Br) c1OC) C  
O (C) c1cc (N (N=O) C) ccc1  
Clc1cccc1N1C (=O) C (=O) N (c2cc3c (cc2) cccc3) C1=O  
O=C (Nc1cccc1) c1cccc1NC (=O) C [NH+] (CC) CC  
Oc1cccc1\C=N\NC (=O) c1cc ([N+] (=O) [O-]) cc ([N+] (=O) [O-]) c1  
Ic1cccc1C (=O) Nc1cccc1C#N  
O=C (N1C=Cc2c (cccc2) C1c1c2c ([nH] c1) cccc2) C  
Clc1ccc (cc1) C1 (O) CC [NH+] (CC1) Cc1onc (n1) -c1nccnc1  
O (Cc1cccc1) c1ccc (cc1OC) C (O) C [N+] (=O) [O-]  
Clc1cc ([N+] (=O) [O-]) ccc1N1CCCC1  
Fc1ccc (cc1) C (=O) NCCc1ccc (OC) cc1  
O=C1Nc2c (ccc3c2cccc3) C (C1) c1ccc ([N+] (=O) [O-]) cc1  
S (=O) (=O) (CC1CC1) c1ncc (n1CC1CCCC1) C [NH+] 1CCC [C@H] 1C (=O) N  
ClC (Cl) (Cl) C (NC (=O) CCC) NC (=S) Nc1cccc1OC  
S (C (F) (F) F) c1ccc (NC (=O) \C (=C\c2ccc (OC) cc2) \C#N) cc1  
S1CC (=O) N (N2C (=O) C3C (C4CC3C=C4) C2=O) C1=S  
O=[N+] ([O-]) c1c2nc (-n3nc (cc3C) C) ccc2cccc1  
O=C1N (CC2N (CCc3c2cccc3) C (=O) N (CC) CC) C (=O) c2c1cccc2  
O1CC [NH+] (CC1) Cc1nncn1CCC (=O) N (CC1CCC [NH+] (C1) CC) C  
s1cc (cc1) CN1C (=O) c2c (cccc2N2CC [NH+] (CC2) Cc2c (F) cccc2F) C1=O  
o1c (ccc1COC) C [NH+] 1CCC (Oc2cc (OC) ccc2C (=O) N2CCCC2) CC1  
S (=O) (=O) (N1CCOCC1) c1cc (ccc1) C (=O) Nc1cc (O) ccc1  
Oc1cc (ccc1O) -c1nc2c (c3c1CCC3) c1c (cc2) cccc1  
S1\C (=C\c2ccc (OC) cc2OC) \C (=O) N (CC (=O) [O-]) C1=S  
Oc1ccc (cc1) C (=O) NNC (=O) CCC (=O) [O-]

O1C2 (C3C (C1c1ccc (cc1) C) C (=O) N (C1CCCC1) C3=O) C (=O) c1c (cccc1) C2=O  
s1cccc1C1N (c2c (N1C) cccc2) C  
Br1cc (cnc1) C (=O) N\N=C/c1c2c (cccc1O) cccc2  
Br1cc (cnc1) C (=O) N\N=C\c1cc ([N+] (=O) [O-]) c (O) c (OC) c1  
Br1cc (Br) cc (CNC (=O) c2cccc2C1) c1OC (=O) C  
FC (F) (F) C (NC (OC (C (C) (C) C) (C) C) (=O) C (F) (F) F  
S (CCOC (=O) C=1C (NC (=O) NC=1C) c1ccc (OC) cc1) c1cccc1  
o1c2c (nc1-c1cc (N) c (cc1) C) cc (cc2) C  
Clc1cc (Cl) ccc1OCC (=O) N1CCCC1  
o1cccc1C [NH+] 1CCC [NH+] (CC1) C  
Clc1cccc1C (Oc1cc2OC (=O) C=C (c2cc1) C) =O  
Clc1cccc1N1CC [NH+] (CC1) Cc1cccc1C (F) (F) F  
s1c2CC ([NH2+] CCCOC (C) C) CCc2c2c1N=CN (CC (C) C) C2=O  
O (CC) c1cccc1N1CC [NH+] (CC1) Cc1cc ([N+] (=O) [O-]) c (O) c (OC) c1  
Br1ccc (\N=C\c2cc ([N+] (=O) [O-]) ccc2C1) cc1  
O1C (=CC=2OC (N) =C (C#N) C (C=2C1=O) c1cc (C) c (OC) cc1) C  
Clc1cccc1NC (=O) c1cc (NC (=O) C (c2cccc2) c2cccc2) ccc1  
Fclcccc (F) c1Cnc1ncc (cc1) C (=O) NCc1nc (on1) C (C) C  
S=C (N) N1NC (=CC1=O) c1cccc1  
O (C) c1cc (OC) ccc1C1Nc2c (NC3=C1C (=O) CC (C3) (C) C) cccc2  
Fclcccc1C (O\N=C (/N) \c1cc ([N+] (=O) [O-]) ccc1) =O  
Fclccc (cc1) CN1CCCC (O) (C [NH+] (Cc2onc (c2) C) C) C1=O  
Clc1cc ([N+] (=O) [O-]) ccc1C (=O) NCC#N  
Ic1ccc (NC (NC (=O) c2sccc2) C (Cl) (Cl) Cl) cc1  
P (OCCCC) (OCCCC) (=O) CC (=O) N  
Clc1cc2OCoc2cc1\C=C/1\SC (NC\1=O) =N  
O=C\1N (c2cccc2C) C (=O) NC (=O) /C/1=C/NCCcn1ccnc1  
[NH+] 1 (CCN (CC1) c1ncccc1) CCC (C) c1cccc1  
Fclcccc1N1CC [NH+] (CC1) Cc1ccc (OCCCC) cc1  
o1nc (nc1C [NH+] 1CCCC1c1ncccc1) -c1ccc (OC) c (OC) c1OC  
Clc1ccc (N=Nc2cc (\C=N\c3c4c (ccc3) cccc4) c (O) cc2) cc1  
o1c (cccc [N+] (=O) [O-]) \C=N\NC (=O) c1ccoc1C  
Oc1ccc (cc1) C [NH+] 1Cc2c (n (nc2C (=O) NCc2ncccc2) CCc2cccc2) CC1  
FC (F) Oc1cccc1C (=O) Nc1ccc (NC (=O) C) cc1  
O (CC) c1ccc (cc1) C (=O) NC1CC1  
Fclcc2nc (N3CCN (CC3) c3cccc3) cc (c2cc1) C  
o1cccc1C [NH2+] CCc1cc (OC) c (OC) cc1  
Fclccc (OC) cc1C [NH+] 1CC2 (CCCC1) CCN (C2) C (=O) c1 [nH] c (cc1C) C  
Clc1cccc1C (=O) Nc1sc2c (CCCC2) c1C (=O) N1CCOCC1  
Fclcccc1CN1CCCC (O) (C [NH2+] CC (C) C) C1=O  
S1\C (=C\C=C\c2cccc2) \C (=O) N (C) C1=S  
Br1cc (NS (=O) (=O) c2cc (OC) c (OC) cc2) ccc1  
S (=O) (=O) (N (CC (=O) Nc1ccnc1) c1cc (cc (c1) C) C) c1cc (OC) c (OC) cc1  
S (=O) (=O) (N\N=C\c1c2c (ccc1OC) cccc2) c1cccc1  
Oc1ccc (cc1 [N+] (=O) [O-]) C1NC (=O) NC (C) =C1C (OCCC) =O  
O1c2cc (ccc2OC1) C1C2=C (NC (C) =C1C (OCCOC) =O) CC (CC2=O) (C) C  
S (CC (=O) NCCc1cc (OC) c (OC) cc1) c1nnnn1-c1cccc1  
s1c (cccc1C) C1C2=C (OC (N) =C1C#N) CC (CC2=O) (C) C  
[nH] lnc (-c2cccc2) c (c1) \C=N\Nc1nc (nc (n1) Nc1cccc (C) c1C) N1CCC (CC1) C  
s1cc (cc1) C [NH+] (Cc1n (CC (C) C) c (S (=O) (=O) Cc2cccc2) nc1) C  
O=C (Nc1cc (cc (c1) C) C) C (=O) NCCcn1ccnc1  
O (C (=O) Cn1nc (C) c ([N+] (=O) [O-]) c1C) CC  
s1c2c (CC (OC2) (C) C) c2c1N=C (SCC) N (CC) C2=O  
O (C) c1cc (C2CC ([O-]) =C3C (=CC (CC3=O) (C) C) C2 (C#N) C#N) c ([N+] (=O) [O-]) cc1OC  
s1c (cccc1C) -c1nc2c (cccc2) c (c1) C (=O) Nc1cc (C) c (cc1) C  
Clc1sc (cc1) -c1nc2c (cccc2) c (c1) C (=O) NCCc1ccc (OC) cc1  
s1c2c (CCCCC2) c (C (OC) =O) c1NC (=O) c1cccc1F  
Clc1cc (ccc1Cl) -c1nc (sc1) NC (=O) c1ccnc1  
s1c2c (CCCCC2) c (C (OCC) =O) c1NC (=O) c1cccc1 [N+] (=O) [O-]  
s1c (C) c (CC) c (C (OC) =O) c1NC (=O) C1CC1  
Br1cc (F) c (NC (=O) c2cc (nc3c2cccc3) -c2cc (Br) ccc2) cc1  
O=C1NC (=O) N (c2nc (n (c12) CCC (C) C) N1CCCC1) C  
Clc1cc (Cl) ccc1\C=C\1/N (C) C (NC/1=O) =N  
S1SC2=C (c3c (N (C (=O) COc4sc5c (n4) cccc5) C2 (C) C) cccc3) C1=S  
Clc1ccc (cc1) C1CC (=O) C2=C (NC (C) =C (C (OCCOC) =O) C2c2cc (F) ccc2) C1  
Clc1cccc1CSCCNC (=O) \C=C\c1ccc (OC) cc1  
O=C (CC1=NC (Cc2c1cccc2) (C) C) C  
O (C (=O) c1ccc (NC (=O) CC (c2cccc2) c2cccc2) cc1) C  
O=C/1N (c2c (cccc2) \C\1=N\NC (=O) c1ccnc1) CC (OCC) =O  
O=C (c1cc (NC (=O) c2cc ([N+] (=O) [O-]) c (cc2) C) ccc1) c1cccc1  
o1nc (-c2cccc2) c (C (=O) NCc2ccnc2) c1C



O (C) c1cc (OC) ccc1\C=N\n1c (nnc1C) C  
Fc1ccc (cc1) C=NN1CCN (CC1) c1ncccc1  
Oc1c (cccc1\C=N\NC (=O) c1 [nH] nc (c1) C1CC1) CC=C  
Brc1cc (ccc1N (C) C) \C=C\1/C (=NN (C/1=O) c1cccc1) C  
O1CCCC1COC (=O) C=1C (C2=C (NC=1C) CC (CC2=O) (C) C) c1cc (OCc2cccc2) ccc1  
Fc1cc (ccc1) -c1 [nH] c2c (n1) cccc2  
S (CC#C) c1nc (cc (C) c1C#N) C  
O (C) c1cc (OC) ccc1\C=C/1\C (=O) N (c2cc (ccc2) C) C (=O) NC\1=O  
Clc1ccc (cc1) C1 (CCC1) C (=O) N1CCC2 (CC2C (=O) Nc2cc (F) ccc2) CC1  
Clc1ccc (-n2c (C) c (cc2C) \C=C (\C (=O) N) /C#N) cc1  
S (=O) (=O) (NC) c1cc (cc (NCC (C) C) c1) C (=O) Nc1cc2CCc2cc1  
Clc1ccc (cc1NC (=O) COc1cccc1) -c1sc2c (n1) cccc2  
Brc1ccc (OCC (=O) Nc2cc (NC (=O) c3ccc (C1) cc3C1) ccc2) cc1  
Fc1ccc (NC (=O) \C (=C\c2cc (n (c2C) C2CCCC2) C) \C#N) cc1  
S (=O) (=O) (N (CC (=O) Nc1cc (cc (c1) C) C) c1cccc1) C  
S ([C@H]1C[C@H] ([NH+] (C1) \C (=C\ \C) C (=O) NCc1cccc1OC) c1 [nH] c2c (n1) cccc  
s1c2c (CCCC2) c (C (OCC (=O) c1-n1c (C) c (cc1C) \C=C (\C (=O) Nc1ccc (F) cc1) /C#N  
OCc1nnn (c1) CC1CC [NH+] (CC1) C1CCN (C1) c1cccc1  
S1\C (=C/c2oc (cc2) -c2cc ([N+] (=O) [O-]) ccc2C) \C (=O) N (c2ccc (OC) cc2) C1=S  
S (=O) (=O) (N (CCc1cccc1) CC (=O) Nc1ccc (F) cc1) c1cc (OC) c (OC) cc1  
Clc1ccc (NC (=O) \C (=C/c2occc2) \C#N) cc1  
O1CCOc2c1cc (cc2) C (=O) N1CC (Nc2ccc (cc2) C (C) C) CCC1  
Clc1cccc (NC (=O) \C (=C\c2oc (cc2) -c2cc (C (=O) [O-]) c (C1) cc2) \C#N) c1C  
Clc1cc (ccc1) C (=O) NC (COC) C  
O (CC) c1cc (cc ([N+] (=O) [O-]) c1O) \C=C\1/C (=O) N (c2cc (ccc2) C) C (=O) NC/1=O  
O (C) c1ccc (cc1) C1N (CCCC (=O) [O-]) C (=O) C ([O-]) =C1C (=O) c1cccc1  
Clc1cc (C) c (cc1) C (=O) C1CCC [NH+] (C1) Cc1sc (nc1) C  
Clc1ccc (C1) cc1OCC12OC3 (C (C1) CN (CC=C) C3=O) C=C2  
O (C) c1cc2c (n (C) c (C) c2\C=C\C2=Nc3c (cccc3) C (=O) N2C) cc1  
Clc1c (cccc1C1) Cc1sc (nc1) N1C (=O) c2c (cccc2) C1=O  
O=C (N1CCCC1) C (=O) NC1CCCC1  
O (CC) c1ccc (NC (=O) \C (=C/c2c3c (n (c2) CC#C) cccc3) \C#N) cc1  
o1c2c (nc1-c1ccc (OCC) cc1) cc (NC (=O) c1cccc ([N+] (=O) [O-]) c1C) cc2  
S (=O) (=O) (N) c1ccc (NC (=O) Cc2cccc2OC) cc1  
O (C) c1cc (ccc1OC) CCNC (=O) c1cc ([N+] (=O) [O-]) c (cc1) C  
Clc1ccc (NC (=O) C2=Cc3c (OC2=O) c (ccc3) CC=C) cccc1C  
s1cc (nc1NC (=O) \C=C\c1cc ([N+] (=O) [O-]) ccc1) C  
O (CC (=O) N1CC [NH+] (CC1) Cc1cccc1C) c1cc (ccc1) C  
Brc1ccc (OCC (=O) NCC=C) cc1  
O (C) c1ccc (cc1) CC [NH2+] C1CC (=O) N (C1=O) c1ccc (cc1) C (OCC) =O  
O=C1N (CC (CC1) C (=O) NCc1 [nH] c2c (c1) cccc2) CC1CCCC1  
Brc1ccc (N2C (=O) \C (=C\c3cc (O) ccc3) \C (=O) NC2=O) cc1C  
S (Cc1ccc ([N+] (=O) [O-]) cc1) c1nnc (n1-c1cccc1) C1Oc2c (OC1) cccc2  
Clc1ccc (cc1) C1 (O) N (N=C (C1) C) C (=O) c1ccc ([N+] (=O) [O-]) cc1  
Clc1ccc (cc1) \C=C (\NC (=O) c1occc1) /C (=O) N1CCOCC1  
O1c2c (ccc (OCC=C) c2) C (C) =C (CC) C1=O  
O (C) c1ccc (cc1) Cc1nn2c (NC (=CC2=O) c2ccc ([N+] (=O) [O-]) cc2) c1-c1cccc1  
o1c (nnc1COc1ccc (cc1) C (C) (C) C) -c1cccc1  
o1c2c (nc1-c1cc (NC (=O) COc3ccc ([N+] (=O) [O-]) cc3) ccc1) cccc2  
O1c2c (cc ([N+] (=O) [O-]) c (O) c2C) C (=CC1=O) C  
O=C (CC (=O) NC1C2CC3CC1CC (C2) C3) C  
Clc1cc (ccc1) CCNC (=O) c1cccn1  
Clc1c (cc (OCC (O\N=C (/N) \c2cccn2) =O) cc1C) C  
Clc1cc (NC (=O) NCC (C) C) ccc1  
Clc1cc (ccc1) C1CC (=O) C=C (Nc2cccc2) C1  
Clc1cc (ccc1) C (=O) NCc1cc (cc (NS (=O) (=O) c2sccc2) c1) C (OC) =O  
s1cc (nc1C ([NH+] (Cc1nc (oc1C) -c1cc (C) c (OC) cc1) C) C) C  
Fc1cc (ccc1) -c1nn2c (N=C (C=C2C) C) c1  
S (=O) (=O) (Nc1ncccc1) c1ccc (NC (=O) \C=C\c2cc (OC) c (OCCC) cc2) cc1  
Brc1c (OC) c (OC) c (OC) cc1C (=O) Nc1c (cccc1C (C) C) C (C) C  
O (CC (=O) Nc1cc (ccc1) C (OCCCC) =O) c1cccc (C) c1C  
S (=O) (=O) (N (CC (=O) Nc1cc (C) c (cc1) C) c1cc (OC) ccc1) c1ccc (cc1) C  
S (C) c1cc (OC) c (cc1) C (=O) NCc1cccc1  
ClC (Cl) (Cl) C (=O) Nc1ccc (OC) cc1OC  
Clc1cc (N (S (=O) (=O) c2cccc2) CC (=O) Nc2cc (ccc2C) C) ccc1C1  
S (C1CC [NH+] (CC1) Cc1nc (oc1C) -c1cccc (OC) c1OC) c1ccc (F) cc1  
S (=O) (=O) (N (C) C) N1CCC (CC1) C (OCC) =O  
Clc1ccc (SCC (=O) NCCCOC) cc1  
s1c (ccc1C) CCNC (=O) c1noc (c1) C [NH+] 1CCC (O) CC1  
O (C) c1cc (ccc1) -c1nc (ncc1) -n1ncc (C (=O) N2CCN (CC2) C=O) c1C1CC1  
Brc1ccc (cc1) C (=O) NC (=S) Nc1c (cccc1C) C

o1c2c(nc1-c1cc(NC(=O)C(C)(c3ccccc3)c3ccccc3)ccc1O)cccc2  
Fc1ccc([N+](=O)[O-])cc1NC(=O)COC1ccc(cc1)C(C)(C)C  
O=C1C(=CN(C=C1C(=O)NC)C1CCCC1)C(=O)NCCc1ccccc1  
S=C1NC(C(C(OCC)=O)=C(N1)C)c1cc2c(cc1)cccc2  
S1\C(=C/c2ccc(OCCOc3cc(cc(c3)C)C)cc2)\C(=O)NC1=N  
Brc1cc2-c3nnc(SCCCC)nc3OC(Nc2cc1)C(=O)c1ccccc1  
S(CC=C)c1nc2OC(N(c3c(-c2nn1)cccc3)C(=O)C)c1ccc(N(C)C)cc1  
s1cc(nc1-n1ncc(C(OCC)=O)c1C[NH+]1C2CC(CC2)C1)-c1ccc(OC)cc1  
Clc1ccc(NC(=O)COC2cc3c(cc2)cccc3)cc1-c1oc2cc(ccc2n1)C  
Clc1ccc(cc1)C(=O)NC(=S)Nc1c2c3c(Cc3cccc2)cc1  
S(C(C(=O)Nc1ccc(cc1)CC#N)C)c1ccccc1  
O1CCN(CC1)c1ccc(NC(=O)CC2Nc3cc(C)c(cc3NC2=O)C)cc1  
S(Cc1ccc(cc1)C)CCNC(=O)CN(S(=O)(=O)C)c1cc(ccc1OC)C  
O=C(NCc1ccccc1N(C)C1CCCC1)C(n1nccc1)C  
S(=O)(=O)(N1CC[NH+](CC1)C)c1ccc(cc1C)C  
Clc1ccc(SCCC(=O)NCCSCc2cccc2)cc1  
O(C)c1cc(ccc1OC)C(=O)c1nc2CCCCc2n1O  
Clc1ccc(OCCCCOc2c3ncccc3ccc2)cc1  
S(=O)(=O)(N(CC(=O)Nc1ccccc1C(=O)[O-])c1cc(ccc1)C(F)(F)F)C  
Clc1c2c(ncccc2)c(OS(=O)(=O)c2cc([N+](=O)[O-])ccc2)cc1  
O=C(NCc1ncccc1)C1CCC[NH+](C1)C1CCN(CC1)C(=O)NCCC  
S1\C(=C/c2ccc(OC)cc2)\C(=O)N(c2c3c(ccc2)cccc3)C1=S  
s1cc(nc1NC(=S)NC(=O)c1ccc(cc1)C(C)(C)C)-c1cc([N+](=O)[O-])ccc1  
S(Cc1ccc(F)cc1)c1[nH]c2c(n1)cc(OC)cc2  
Oc1ccc(Nc2nnc(c3c2cccc3)-c2ccc(cc2)C(=O)N)cc1  
Clc1cc(cc(C1)c1O)\C=C/1\C(N2N=C(SC2=NC\1=O)CCCC)=N  
O(C)c1cc(OC)ccc1C[NH+]1CCC(CC1)C(=O)N1CCCC1  
Brc1cc(cnc1)C(=O)NC(=S)Nc1ccc(OC)cc1OC  
Clc1ccc(cc1)\C=C\C(=O)NC(=S)Nc1cc(OC)ccc1  
O=C(N(CC1CC[NH+](CC1)CCc1ccccc1C)C1CCCC1)CCn1nnc1  
Sc1nnc(n1N=Cc1ccc(OC)c1O)-c1ccc(cc1)C  
O=C1C(=CN(C=C1C(=O)NC(C)C)C1CCCC1)C(=O)N1CCCC1  
O=C1N(CC(=O)Nc2c(cc(cc2)C)C)C(=O)C2C1C1c3c(C2c2c1cccc2)cccc3  
O1c2c(-c3c(cc(OC)cc3)C1=O)ccc(OCc1cc(OC)ccc1)c2C  
Brc1cc(C1)c(OC(=O)NCCCc2cccc2)cc1  
O(CC)c1ccccc1NC(=O)CCCc1ccccc1  
o1c2c(cccc2)c(NC(=O)c2ccc(OC)cc2)c1C(=O)c1ccc(OC)cc1  
Brc1cc2C=C(C(=O)NC=3SCCN=3)C(Oc2cc1)=O  
O=C1N(CCC(OCC=C)=O)C(=O)c2c1cc([N+](=O)[O-])cc2  
O(C(=O)c1ccccc1NC(=O)CCC(C)(C)C1CCCC1)C  
s1c2CC(Cc2c(C(OCC)=O)c1NC(=O)COC1ccc(F)cc1F)CC  
s1ccccc1-c1scc(n1)C(=O)N  
Fc1ccc(cc1)C1[NH+](CCCC1)Cc1onc(n1)CC1CC1  
O=C1C2=C(N(N(C)C)C(N)=C(C#N)C2c2cc([N+](=O)[O-])ccc2)CC(C1)(C)C  
S=C(Nc1ccccc1F)N1CCN(CC1)C(=O)C1OCCC1  
Clc1cc(C1)ccc1\C=C\C(=O)Nc1cc(NC(=O)CC)ccc1  
s1ccccc1-c1nn(cc1C1NC(=O)NC(C)=C1C(OC(C)C)=O)-c1ccccc1  
Clc1ccc(SCC(=O)Nc2ccc(S(=O)(=O)Nc3c4c(ccc3)cccc4)cc2)cc1  
Clc1cc(cc(OC)c1OS(=O)(=O)c1ccc(cc1)C)C(=S)N1CCOCC1  
O=C1N(CC(C1)C(=O)[O-])Cc1ccccc1  
n1c(cc(nc1NCc1ccccc1)Nc1ccc(cc1C)C)C  
Clc1cc(ccc1C)-c1oc2c(n1)cc(NC(=O)c1ccccc1F)cc2  
O(C)c1ccc(OC)cc1C[NH+]1CCC([NH+]2CC[NH+](CC2)CCO)CC1  
Clc1ccccc1NC(=O)C1Oc2c(OC1)cccc2  
O(CC)c1ccc(cc1)C[NH+]1CCC([NH+]2CCCCC2)CC1  
Fc1ccccc1NC(=O)c1ccc(OCc2cccc2)cc1  
Clc1cc(NC(=O)CN(S(=O)(=O)c2ccccc2)c2cccc(C)c2C)ccc1  
S(Cc1occc1)CCNC(=O)CN(S(=O)(=O)C)c1ccc(cc1)C(C)C  
Brc1cc2c(NC(=O)C2(O)CC(=O)c2c(cc(cc2)C)C)cc1  
Clc1cc2c(nc(C)c(C[NH+]3CCCC3)c2O)cc1  
Brc1cc(ccc1OC)C(=O)Nc1ccc(NC(=O)c2sccc2)cc1  
s1cc(cc1)C[NH2+](C1CCN(CC1)c1ccc(cc1)C(=O)NC(C)c1ccccc1  
Clc1ccccc1\C=C\C(=O)Nc1sc(nn1)C(C)(C)C  
Clc1cc([N+](=O)[O-])c(cc1)C(=O)Nc1ccc(S(=O)(=O)N2CCOCC2)cc1  
O(C)c1cc(OC)ccc1CNC(=O)CCC1CCC[NH+](C1)Cc1nccn1C  
S1/C(=C\C=C\C2cccc2)/C(=O)N(CCC(=O)Nc2ncccc2)C1=S  
S1c2c(N(c3c1cccc3)C(O\N=C(/N)\c1ccc(cc1)C)=O)cccc2  
S(=O)(=O)(N(Cc1ccccc1)CC(=O)Nc1cc(ccc1OC)C)c1ccc(F)cc1  
Clc1ccccc(NC(=S)NCc2cccc2)c1C  
Clc1cc(ccc1)CSc1nnc(n1C)CCNC(=O)c1ccc(OC)c1OC  
s1ccccc1C(=O)C=1C(N(CC[NH+]2CCOCC2)C(=O)C=1[O-])c1ccc(OC)cc1

Clc1ccc(cc1C(=O) [O-]) -c1oc(cc1) \C=C/1\C(=O)N(NC\1=O) c1cc(C) c(cc1)C  
 Clc1cc2c(OC(=O)C=C2CCCC) cc1OC(=O) c1cccc1  
 O1c2cc(ccc2OC1) C1N(CC[NH+]) (CC) CC) C(=O) C([O-])=C1C(=O) c1ccc(OC(C)C) cc1  
 O(C(=O)C=1C(n2ncnc2NC=1c1cccc1) c1cccn1) CC  
 Fc1ccc(cc1) C1C2=C(NC=3NC(=O)NC(=O)C1=3) CCCC2=O  
 Oc1c2cc(ccc2nc(C) c1C[NH+]) 1CC[NH+](CC1)C) CC  
 Clc1cc(NC(=O) \C=C\c2ccc(OCCC) cc2) ccc1C  
 O=C1CC2(CCC1(C)C2(C)C)C(=O)Nc1c2c(ccc1) cccc2  
 Oc1c2c(nc(C) c1C[NH+](C)C) c(C) c(cc2)C  
 O(CCCC(=O)Nc1ccc(OCC) cc1) c1ccc(OC) cc1  
 slcccc1C(=O)CSc1nnc(n1Cc1cccc1) -c1cccc1  
 O=C(N1CCC(CC1)C(=O)NC1CCCCC1) c1cccc1C  
 S(=O)(=O)(NC(C)C) c1cc(cc(NCC2CCC=CC2) c1)C(=O)N(Cc1nonc1C)C  
 S(CC(=O)Nc1cccc1Oc1cccc1) c1nnnn1Cc1cccc1  
 Clc1cc(NC(=O)C) c(OS(=O)(=O) c2ccc(OC) cc2) cc1  
 Brc1ccc(O) cc1C=C1C(=O)N(C)C(=O)N(C)C1=O  
 O=C(NCc1ccnc1N(Cc1cccc1)C)C[C@H]1[C@H]2C=C[C@H](C1)C2  
 Brc1cc(OCC[NH+])2CCCC2) ccc1  
 S(=O)(=O)(N1CCC(CC1)C(=O)N1CCC(CC1)C(OCC)=O) c1ccc(OC) cc1  
 O(C(=O) c1cccc1NC(=O)C1CCN(CC1)C(=O)Cc1cccc1)C  
 Fc1ccc(cc1)C(=O)COC(=O)CCC(=O)Nc1cccc1CC  
 slcccc1C1NC(=S)NC(C)=C1C(=O)N(C)C  
 S(CCCN1c2c(NC1=O) cccc2) c1nc2n(c3c(c2nn1) cccc3) CCc1cccc1  
 Clc1cc(ccc1Cl)CN(S(=O)(=O) c1cccc1)CC(=O)NCc1occc1  
 OC1(c2c(N(CC(=O)N)C1=O) cccc2)CC(=O) c1ccc([NH+](=O)[O-]) cc1  
 S(=O)(=O)(N1CCC(CC1)(Cc1ccc(OC) cc1)CO)Cc1cccc1  
 Clc1cc(ccc1Cl)C(=O)COC(=O) c1cc(OC) ccc1  
 slcccc1-c1csc(NC(=O) c2cccc2OC(=O)C) c1C(OCC)=O  
 Clc1ccc(cc1) -c1nc-2n(n1)C=Nc1sc3c(CC([NH2+])C3(C)C)(C)C) c1-2  
 S(=O)(=O)(N(CC(=O)Nc1cccc(C) c1C) c1cc([NH+](=O)[O-]) ccc1)C  
 slc2ncnc(NC3CCOC3) c2c(C) c1C(=O)NC1CCCC1  
 slc2CCCc2c2c1N=C1N(N=C(N3CCCC3) c3c1cccc3) C2=O  
 Brc1ccc(OCC(O)C[NH+])2CC[NH+](CC2)C) cc1  
 Clc1cc(\C=C\2/SC(=NC/2=O)NC(=O)C) c(OCCc2ccc(F) cc2) cc1  
 O(N=C(C)C) c1nc(nc(n1)NCC)N(C)C  
 S(CC(=O)Nc1c2c(ccc1) cccc2) c1nc(N)cc(n1)N  
 O=C(NC(CCc1cccc1)C) c1cccc1C(=O)NC(CCc1cccc1)C  
 Clc1cc(ccc1)CCNS(=O)(=O) c1cccc1  
 Clc1cc(C(=O)NC23CC4CC(C2)CC(C3)C4) c([NH+](=O)[O-]) cc1  
 Clc1cc(ccc1Cl) \C=C\c(=O)Nc1cc([NH+](=O)[O-]) ccc1OC  
 S(=O)(=O)(NC1CCC(NS(=O)(=O)CC)CC1)CC  
 S1C=Cn2cc(nc12)C(=O)N1CCc2c(C1) cnc(C) c2CNC(=O) c1ccoc1C  
 S(=O)(=O)(NCC(OC(C(=O) c1cccc1)CC)=O) c1ccc(cc1)C  
 Clc1cccc1C[NH+])1C[C@H]([NH2+])Cc2cc(ccc2C)C[C@H]1C(=O)NCC  
 FC(F)(F) c1nc2c(n1C(C) c1cccc1) cccc2  
 Brc1cc(cnc1)C(=O)NC(=S)Nc1cc(ccc1)C1OC(C)(C)C(O1)(C)C  
 O(C) c1cccc1C[NH+])1CCC(CC1)CN(C(=O) c1ccc(N(C)C) cc1)CCOC  
 S1\C(C=C\c2c3c(n(c2)C) cccc3) \C(=O)N(CC=C)C1=O  
 FC(F)(F) c1cc(N2N=C(C) \C(=C\c3cc(OC) c(OCC(=O)N) cc3) \C2=O) ccc1  
 S(=O)(=O)(N(C(=O)C) c1cc2c(oc(C) c2C(OCC)=O) cc1) c1ccc(F) cc1  
 Ic1cc(ccc1C)C(=O)Nc1cc([NH+](=O)[O-]) ccc1OC  
 Brc1cc(\C=C\C(=O)NC(=S)Nc2cc(C(=O)[O-]) c(Cl)cc2) c(OC) cc1  
 S=C1NC(=O)/C(=C\c2ccc(N3CCOCC3) cc2C)/C(=O)Nc1cccc1  
 Brc1cc2c(n(cc2\C=C/2\C(=O)N(C)C(=S)NC\2=O)CC(=O)N(CC)CC) cc1  
 Clc1cccc1OCC(=O)Nc1ccc(S(=O)(=O)N2CCCC2) cc1  
 S(CC(=O)Nc1ccc(OC(=O)C) cc1) c1cccc1  
 Clc1cc(C) c(NC(=S)N2CCN(CC2)C(=O)C2OCCC2) cc1  
 o1c(ccc1COc1c2c(ccc1) cccc2)C(=O)NCc1occc1  
 slc(nnc1SC(CC)C(=O)NC(C) c1cccc1)N  
 Clc1cc(NC(=O) c2sc3nc(C) c(CC=C) c(c3c2N)C) ccc1  
 Clc1cccc1OCc1cc(ccc1)C(=O)N1CC(OC(C1)C)C  
 Brc1ccc(S(=O)(=O)N(Cc2ccc(Cl)cc2)CC(=O)N)cc1  
 Clc1cc(Cl) c(Cl) cc1NC(=O)CN(S(=O)(=O) c1cccc1)C  
 O(C) c1cc(ccc1) -c1nc(nnc1)NCCc1nc(cc(n1)C)C  
 S(=O)(=O)(NCC(=O)Nc1cccc1F) c1ccc(cc1)C  
 S(=O)(=O)(N1CCN(CC1) c1cccc1OCC) c1ccc(cc1) C1CCCC1  
 S(=O)(=O)(Nc1nc(nc(c1)C)C) c1ccc(NC(=O) c2c(cc(cc2C)C)C) cc1  
 Clc1cc(ccc1Cl)COc1ccc(cc1OCC)CO  
 slc(C(OCC)=O) c(nc1NC(=O)CCN1C(=O) c2c(cccc2)C1=O)C  
 S(=O)(=O)(N1CCC(CC1)C(=O)N1CC[NH+](CC1)Cc1cc2OCoc2cc1)C  
 S(=O)(=O)(N(CC(=O)Nc1cccc1C(=O)NCC=C) c1cc(C) c(cc1)C) c1cccc1

Fc1ccc(cc1)CN1C=C(C(OCC)=O)C(C(=C1)C(OCC)=O)c1cc2OCOc2cc1  
 Clc1cc(NC(=O)CCCC)ccc1N1CCN(CC1)C(=O)CCC  
 Brclcc(\C=C\C2nc3c(cc2)cccc3OC(=O)CC)c(OC)cc1  
 Clc1ccc(cc1)/C(=N/OC(=O)CSc1cccc1)/N  
 Oc1c(cc(cc1-c1[nH]c2c(n1)cccc2)C(C)(C)C)-c1[nH]c2c(n1)cccc2  
 s1cccc1CNC(=O)CSc1nc(cc(n1)C(F)(F)F)-c1occcc1  
 S(=O)(=O)(N1CCc2c(C1)cccc2)c1cc(C)c(OC)cc1C  
 N(CCCNc1cccc1)c1cccc1  
 Fc1cc(F)ccc1N\C=C\C(=O)c1occcc1  
 Clc1cc2c(OC(=O)C=C2CC)cc1OCC(=O)c1cc(C1)c(C1)cc1  
 O1CCc2c(cccc2)C1CNC(=O)C1=CN(C=C(C(=O)NCC(C)C)C1=O)C(C)C  
 O1c2cc(OC(=O)CCN3C(=O)c4c5c(cccc5cccc4)C3=O)ccc2OC1  
 O1c2c(ccc(OCc3cccc3OC)c2)C(=CC1=O)c1cc([N+](=O)[O-])ccc1  
 S(=O)(=O)(NCC1OCCC1)c1ccc(cc1)C(=O)N1CCN(CC1)c1cccc1F  
 Clc1cc2nn(nc2cc1NC(=O)C(C1)(C1)Cl)-c1occcc1  
 S(Cc1occcc1)CCNC(=O)c1ccc(cc1)-c1occcc1  
 O(CCN1nnc1)c1occcc1-c1occcc1  
 O=C1N(CCN(C1)C(=O)C=1NC(=O)c2c(N=1)cccc2)Cc1cc(ccc1)C  
 S(=O)(=O)(NCCC)c1cc2c(cc1)cccc2  
 Clc1cc(ccc1OCC)C(=O)C=1C(N(CC[NH+](C)C)C(=O)C=1[O-])c1ccc(F)cc1  
 S(=O)(=O)(NC(CC)C)c1ccc(OC(=O)NCC2OCCC2)cc1  
 Ic1cc2c(N=C(SCC=C)N(CC=C)C2=O)cc1  
 Clc1ccc(N2C3=C(C=C(C(=O)Nc4ccc(cc4)C(OCC)=O)C2=O)C(=O)CCC3)cc1  
 S(CC=1NC(=NC(=O)C=1)Nc1nc(c2cc(ccc2n1)C)C)c1nnnn1-c1occcc1  
 Brclcc(cc1)C(=O)N1CCN(CC1)c1ccc(OC)cc1  
 O(CCC)c1ccc(cc1OC)C(=O)N  
 S(CC(=O)Nc1cc(ccc1)C(F)(F)F)C=1NC2=C(C(C=1C#N)c1ccc(OC)cc1)C(=O)CC(C2)(C)C  
 s1occcc1C1=NN(C(=O)C)C(C1)c1occcc1  
 s1ccnc1NC(=O)C(Sc1nnnn1-c1occcc1)CC  
 S(=O)(=O)(C(S(=O)(=O)c1occcc1)=CNc1ccc(OC)cc1)c1occcc1  
 O(C)c1c(OC)cc(cc1OC)CNc1nc2c(n1CC[NH+](CC)CC)cccc2  
 O(C)c1cc(OC)ccc1C1C(=CN(C=C1C(OC)=O)Cc1cc(OC)c(OC)cc1)C(OC)=O  
 O(C)c1occcc1NC(=O)C(=O)NCC1[NH+](CCC1)CC  
 S(CC(=O)NCC1occcc1)c1nnc(n1C)CNC(=O)c1occcc1F  
 O=C(NC(CC1occcc1)C)c1ccc(NC(=O)CCCC)cc1  
 S(CC(=O)Nc1occcc(C)c1C)c1[nH]c(c(n1)-c1occcc1)-c1occcc1  
 s1c(nnc1NC(=O)c1cc(C)c([N+](=O)[O-])cc1)CCCC  
 o1ccc(C(=O)N[N-]C(=O)Nc2cc(ccc2OC)C)c1C  
 S(=O)(=O)(N1CCCC1)c1ccc(NC(=O)CN(S(=O)(=O)C)c2ccc(OC3cccc3)cc2)cc1  
 S(=O)(=O)(Nc1nc(cc(n1)C)C)c1ccc(NC(=O)COC2c(cccc2C)C)cc1  
 S(c1ccc([N+](=O)[O-])cc1C=O)c1oc(nn1)-c1occcc1  
 S(=O)(=O)(N1C(CCC1=O)C(=O)Nc1occcc1C(=O)N)c1ccc(cc1)C  
 S(C)c1occcc1NC(=O)CN(S(=O)(=O)C)c1occcc1CC  
 Clc1cc(NC(=O)N2CCCCC2)c(OC)cc1  
 S(=O)(=O)(Nc1nc(nc(c1)C)C)c1ccc(NC(=O)COC)cc1  
 Clc1cc(NC(=O)Nc2ccc(cc2)C(F)(F)F)c(OC)cc1  
 Brclccc(S(=O)(=O)NC(C(=O)Nc2cc(ccc2)C(=O)C)C)cc1  
 s1c2CC(Cc2c2c1nnc2SCC(=O)NCC1OCCC1)C  
 n1c2c(n(CC=C)c1NCc1c3c(ccc1)cccc3)cccc2  
 S(=O)(=O)(NC1CC(=O)N(C1)CCc1ccc(F)cc1)CC  
 Ic1cc2c(N=C(N(c3ccc(cc3C)C)C2=O)\C=C\C2nc2cccc2)cc1  
 s1c2c(nc(nc2NC(Cc2cccc2)C)C)c2cc3c(nc12)CC(OC3)(C)C  
 O=C(NCC1occcc1)c1nc(NCc2cccc2)c2c(n1)cccc2  
 Clc1occcc(NC(=O)c2cc3c(cc2)C(=O)N(Cc2ccnc2)C3=O)c1C  
 Brclccc(cc1)C(=O)CN(N1C(=O)c2c(cccc2)C1=O)C(=O)c1ccc([N+](=O)[O-])cc1  
 Clc1ccc(OCN2C=NC3c(cccc3)C2=O)cc1CC  
 O=C1NC(=O)c2c1cc(NC(=O)CCC(=O)[O-])cc2  
 S(CCC([NH+])1CCC(OC2ccc(cc2)C(=O)NCc2ncccc2)CC1)C)C  
 FC(F)(F)C1(NC(=O)N(CCc2cc(OC)c(OC)cc2)C1=O)NC(=O)c1occcc1  
 S(=O)(=O)(NC1(C2=C(NC1=O)N(c1ccc(cc1)C)C(=O)NC2=O)C(F)(F)F)c1ccc(cc1)C  
 Brclccc(cc1)C(=O)C(C)C)C1C(C(OCC)=O)C(OC1(C)C)=O  
 s1c(SCc2c3c(ccc2)cccc3)nnc1SCc1ccc(OC)cc1  
 O1CCN(CC1)c1ccc(NC(=O)NC(C)C)c2cc(ccc2)C(C)=C)cc1  
 O1CCOc2c1cc(cc2)\C=C(\C#N)/c1[nH]c2c(n1)cc(cc2)C  
 Clc1cc(C1)cc(C[NH2+])CCc2cc(OC)c(OC)cc2)c1OC  
 O=C(NCC1occcc1)c1occcc1NCc1occcc1  
 s1c(nnc1SCC(=O)Nc1ccc(n1)C)C  
 Clc1ccc(cc1S(=O)(=O)Nc1cc(ccc1C)C)C(=O)NCCOC  
 s1c2c(CCC2)c(C(=O)NCc2occcc2)c1NC(=O)c1oc2c(ccc(c2)C)c1C  
 s1c(C)c(CC)c(C#N)c1NC(=O)c1cc(nc2c1ccc(C)c2C)-c1occcc1  
 O(C)c1cc2c(n(C)C)c2\C=C\C2=NC3c(cccc3)C(=O)N2CCc2cccc2)cc1

Br1ccc(cc1)C(=O)COC1cc2OC(=O)C(=Cc2cc1)c1ccc(OC)cc1  
 Clc1ccc(NC(=O)c2cccc2)cc1C(=O)[O-]  
 s1cc(c2c1N=C(SCC(=O)c1c3c([nH]c1C)cccc3)N(C2=O)c1cccc1)-c1occc1  
 O=C(NCC(=O)NNC(=O)c1ccc(cc1)-c1cccc1)C1CCCC1  
 Clc1cc(cc(OCC)c1OCc1cccc1C#N)\C=C(\C#N)/c1ccc(F)cc1  
 Br1ccc(NC(=O)c2ccc(N(S(=O)(=O)c3ccc(Cl)cc3)C)cc2)ccc1  
 S1c2c(N(c3c1cccc3)C(=O)CSc1nnc(n1C)-c1occc1)cccc2  
 Clc1cc(C[NH+]2CCN(CC2)c2ncccc2)c(O)c2ncccc12  
 Clc1ccc(cc1)-c1nc(on1)CN(C(C)C)C(=O)COC1cccc1  
 o1cccc1-c1n2N=C(c3c(-c2nn1)cccc3)C  
 O1c2cc(ccc2OC1)C(=O)NC(CC)(CC)C#C  
 o1c(ccc1C)C(=O)Nc1cc(OC)c(OC)cc1  
 S(=O)(=O)(Nc1cccc1C)c1cc(ccc1C)C(=O)NCCc1cc(OC)c(OC)cc1  
 s1c2c(nc1C)cc(S(=O)(=O)NC1CCCCC1)cc2  
 Ic1cc(S(=O)(=O)N2CCc3c(C2)cccc3)ccc1OC  
 S(=O)(=O)(Nc1cccc1C(=O)NCc1cccc1C)C  
 s1c2CCCCc2c2-c3nc(nn3C=Nc12)COC1cc2c(cc1)cccc2  
 O(C)c1cc(ccc1)CNC(=O)CCC1CCCN(C1)C(=O)CCCc1cccc1  
 O(C)c1ccc(NC(=O)c2cccc2NC(=O)c2ccc(NC(=O)C)cc2)cc1  
 S(=O)(=O)(NCCOCC)c1ccc(NC(=O)Cn2c3c(nc2)N(C)C(=O)N(C)C3=O)cc1  
 S(CC(=O)Nc1cccc1)c1nnc(n1-c1cccc1)-c1ccc(cc1)C(C)C  
 s1c(cnc1NC(=O)COC1cc(C)c(cc1)C)Cc1cc(ccc1)C(F)F  
 S(=O)(=O)(NCC)c1ccc(NC(=O)C(CC)c2cccc2)cc1  
 s1c(C(=O)NC(C)c2cccc2)c(C)c(C(OC)=O)c1NC(=O)c1cccc1F  
 Clc1c2c(ccc1)c(ccc2)-c1oc2c(n1)cc(NC(=O)c1oc([N+](=O)[O-])cc1)cc2  
 Clc1cc(NC(=O)COC2cc3c(OC(=CC3=O)c3cccc3)cc2)ccc1C1  
 Clc1ccc(S(=O)(=O)N(C)c2ccc(cc2)C(=O)N2CC[NH+](CC2)Cc2cccc2)cc1  
 o1c2cc(NCc3ccc(OC)cc3OC)ccc2c2c1cccc2  
 Fc1ccc(cc1)C(Oc1cc2c(OC(=CC2=O)c2cccc2)cc1)=O  
 Ic1cccc1C(=O)Nc1ccc(S(=O)(=O)Nc2cc(OC)ccc2OC)cc1  
 Clc1cc(ccc1NC(=O)Cn1ncc([N+](=O)[O-])c1)C(F)F  
 Fc1ccc(cc1)Cn1c2c(nc1C[NH+])1CCCC1)N(C)C(=O)N(C)C2=O  
 Clc1cc2c(occ2CC(=O)N)cc1C  
 s1ccc(C)c1C1C2=C(NC=3N(C)C(=O)N(C)C(=O)C1=3)CCCC2=O  
 Clc(F)C(F)F)Oc1ccc(N2C(=O)C(Sc3ncccc3C(=O)[O-])CC2=O)cc1  
 Clc1cc([N+](=O)[O-])ccc1C(=O)Nc1ccc(cc1)C(F)F  
 O=C1N(Cc2ccnc2)C(=O)c2c1c(N1CCN(CC1)C(=O)C(C)C)ccc2  
 s1cc(nc1)CC(=O)N1Cc2cc(ccc2OCC1)C(O)(CCn1ncccc1)C  
 s1c2nenc(NCCc3cccc3F)c2c(C)c1C(=O)N(C)C(C)C  
 Clc1cccc1S(=O)(=O)N1Cc2c(OCC1)c(OCCCC1[NH+](CCCC1)C)cc(c2)-c1cccc1  
 s1c(ccc1C(=O)NCCNC=1NC(=O)C=C(N=1)C)C1[NH2+]CCCC1  
 Fc1cccc1CNC(=O)c1nn(c2c1CC([NH+](CCOC)C)CC2)C  
 FC(F)F)c1cc(N2CC[NH+](CC2)C2CCC[NH+](C2)CCC)ccc1  
 O=C(NCc1cccc1)c1nn(c2c1C[NH+](CC2)C(CCc1c2c([nH]c1)cccc2)C)C  
 O1CC[NH+](CC1)CC(C)C)c1[nH]c2c(n1)n(nc2C)C1CCCC1  
 Oc1cc2c(n(C)c(C)c2C(=O)N2Cc3c(n(nc3C(=O)NC3CCCC3)CC(C)C)CC2)cc1  
 o1nc(nc1C[NH+](Cc1n2c(nc1C)C=CC=C2)C)-c1cc2OCOC2cc1  
 Oc1nc(ccc1C[NH+])1CCCC1CCCCO)C  
 O=C1NCCN(C1)C(=O)c1nn(c2c1C[NH+](CC2)C(C)C)CCCc1cccc1  
 O(C)c1c2c(cccc2)c(cc1)C[NH+](CCn1nnc(c1)C(=O)N1CC[NH+](CC1)C)C  
 Clc1cc(ccc1)CCNC(=O)[C@H]1[NH+](C[C@H](n2nnc2)C1)Cc1ccc(OCc2cccc2)cc1  
 FC(F)F)c1cccc1C[NH+])1CC(CCC1)(Cc1cc(OC)ccc1)CO  
 O(c1cccc1C(=O)N(CC=C)CC=C)C1CCN(CC1)C(=O)COC  
 Clc1cc(F)ccc1CC(=O)N1[C@H]2[C@H](CCCC1)CN(CC2)C(=O)c1cccc1  
 S1CC(Nc2ncc(cc2)C(=O)N2CCC(Oc3ccnc3)CC2)CC1  
 Clc1ccc(cc1)CN1C=C(C(OCC)=O)C(C(=C1)C(OCC)=O)c1cc2OCOC2cc1  
 O=C1C2=C(NC(=O)CC2c2cc([N+](=O)[O-])c(cc2)C)CCC1  
 Clc1ccc([N+](=O)[O-])cc1C(=O)N1CCN(CC1)c1ccc(OCc2cccc2)cc1  
 s1cc(c2CCC(Cc12)C)C(=O)N\N=C\c1ncccc1  
 Br1cc2c(nc(cc2C(=O)Nc2ccc(cc2)C(=O)N2CCCC2)-c2ccc(cc2)CCCC)cc1  
 O1c2c(C=C(C(=O)NCC(OCC)=O)C1=O)cccc2OCC  
 Br1cc2nc(cc(c2cc1)C(=O)[O-])c1cc(Cl)c(Cl)cc1  
 s1c2N=C(S)N(NC(=O)c3ccoc3C)C(=O)c2c(C)c1C(=O)[O-]  
 Clc1cc(F)ccc1CSCC(=O)NN  
 O=C(NNC(=O)c1cc([N+](=O)[O-])cc([N+](=O)[O-])c1)c1cc([N+](=O)[O-])cc([N+](=O)[O-])c1  
 Clc1cccc(F)c1CC(=O)N[N-]C(=S)Nc1cc2OCCOC2cc1  
 Clc1cccc1OCC(=O)Nc1sc(C)c(C)c1C(OC(C)C)=O  
 O(C)c1cc(ccc1OC)-c1nc2c(ccc2)c(c1)C(=O)N\N=C(/C)\c1ccc(NC(=O)C)cc1  
 s1c2c(CCC2)c(C(OC(C)C)=O)c1NC(=O)c1cccc1  
 Clc1ccc(Cl)cc1S(=O)(=O)N\N=C(\C)/c1cc(NC(=O)c2sc(cc2)C)ccc1  
 s1ccc(C)c1C(=O)N\N=C\c1c(cc(cc1C)C)C

01C2CCCC1C (C (=O) [O-]) C2C (=O) N (CCCC) CCCC  
 Brclen (nc1 [N+] (=O) [O-]) Cc1oc (cc1) C (=O) N\N=C/C (=C/c1cccc1) /C  
 FC (F) (COCc1cc (ccc1OC) \C=C (\C (=O) C (C) (C) C) /C#N) C (F) F  
 Clc1ccc (Cl) cc1S (=O) (=O) N\N=C/c1c [nH] nc1-c1ccc (cc1) CC  
 S (=O) (=O) (N\N=C/c1c [nH] nc1-c1cc (OC) c (OC) cc1) c1ccc (cc1) CCC  
 s1cc (-c2nnc (SCc3cc (OC) ccc3) n2C) c (C) c1C  
 Br1ccc (cc1) -c1nc (sc1) NC (=O) CSc1nnc (n1C) -c1cccn1  
 s1cc (-c2nnc (SCC (=O) Nc3ccccc3C (F) (F) F) n2CC) c (C) c1C  
 Clc1c2c (sc1C (=O) N\N=C (/C) \c1cc (NC (=O) C (F) (F) F) ccc1) cc (cc2) CC  
 Clc1ccc (cc1) -c1nc (nnc1) NCc1c (F) c (ccc1F) C  
 s1ccc (C (OCC) =O) c1NC (=O) \C (=C\c1cccc1OCCCC) \C#N  
 S (C) c1cc (NC (=O) NCC2ccncc2) ccc1  
 Clc1cccc (Cl) c1C [NH+] 1CCN (CC1) C (=O) Nc1cc (SC) ccc1  
 O (C) c1cc ([N+] (=O) [O-]) ccc1NC (=O) N1CC [NH+] (CC1) Cc1cccn1  
 Clc1cc (ccc1Cl) Cn1nc (NC (=S) Nc2cc (ccc2C) C) c (Cl) c1  
 o1c2c (cccc2) c (C) c1C (=O) NC (C) c1ccc (cc1C) C  
 Clc1cc (NC (=S) Nc2nn (cc2) Cc2ccc (Cl) cc2) ccc1C  
 Clc1sc (cc1) C (NC (=O) NCC1OCCC1) C  
 S (=O) (=O) (N1CC2c1cccc2) c1ccc (NC (=S) Nc2ccc (cc2) C (CC) C) cc1  
 01c2c (cc (OCC) cc2) C (=CC1=O) C [NH+] 1CC [NH+] (CC1) CC (=O) Nc1ccc (cc1) C  
 Clc1cc (NC (=O) CN2C (=O) c3cccn3N (c3ccccc3) C2=O) c (cc1) C  
 Brclccc (cc1) C (=O) CSC=1NC (C) =C (C (=O) C) C (CCC) C=1C#N  
 01c2c (C (=O) Nc3c1cccc3) c (OCCC) cc ([N+] (=O) [O-]) c2  
 01c2c (C (=O) Nc3c1cccc3) c (Oc1cc (ccc1) C) cc ([N+] (=O) [O-]) c2  
 01c2c (C (=O) Nc3c1cccc3) c (Oc1ccc (NC (=O) C) cc1) cc ([N+] (=O) [O-]) c2  
 ClC (Cl) (Cl) Cc1c2c (n (c1C) -c1ccc (OC (F) (F) F) cc1) CC (CC2=O) (C) C  
 FC (F) (F) COc1nc (nc (n1) NC (CC) C) N1CC [NH+] (CC1) C12CC3CC (Cl) CC (C2) C3  
 S (=O) (=O) (NCCc1cc (OCC) c (OCC) cc1) c1ccc ([N+] (=O) [O-]) cc1  
 01C (C) (C) C (O) (N (CC (=O) Nc2ccc (cc2) C) C1=O) C  
 s1c (ccc1C (=O) NC (CCCC) C (=O) [O-]) C#CC (O) (C) C  
 O (C) c1cc (C#N) c (NC (=O) C [NH+] 2CCCC2CCO) cc1OC  
 S=C (Nc1nccc (c1) C) C (=O) N  
 s1c2c (CCCC2) c (C (OCC) =O) c1NC (=O) C [NH+] 1CCC (CC1) Cc1cccc1  
 Clc1cc (N2NC3 (NC2=S) CCCC3) c (OC) cc1  
 O (C) c1cc (ccc1) C=1N (c2n (c3c (n2) N (C) C3=O) C=1) CC (O) c1cccc1  
 s1cccc1C1CC (=O) C2=C (NC (C) =C (C (=O) Nc3ccc (F) ccc3) C2c2ccc (F) cc2) C1  
 s1c2nc (cc (c2c (NC (=O) CC (C) C) c1C (OCC) =O) COC) C  
 S/1CC (=O) N\C1=1N\N=C/1\CC (N2N=C (N (CC) C2=S) Cn2nc (nn2) -c2ccc (cc2) C) C2OC\1OC2  
 O=C1N (C) C (=O) N (c2nc3n (c12) C (C) =C (N3c1ccc (cc1) CC) c1cccc1) C  
 Clc1cc (Cl) ccc1Cn1nc (NC (=O) c2ccc (F) cc2) cc1  
 OC=1N2CC (=O) C=C2C=C (C) C=1C#N  
 O=C1N (C) C (=O) N (c2nc3n (c12) C=C (N3c1cc (cc (c1) C) C) c1ccc (cc1) CCCCCC) C  
 O (C) c1cc (C (OC) =O) c (NC (=O) c2cc3c (n (Cc4ccccc4) c (C) c3C) cc2) cc1OC  
 FC (F) (F) Cln2nc (cc2NC (Cl) c1ccc (cc1) C) C (=O) NCC1cn (nc1C) C  
 FC (F) (F) C (NC (ON=C (C) C) =O) C (F) (F) F  
 o1c (ccc1Cn1nc (cc1C) C) C (=O) Nc1ccc (OC) cc1OC  
 s1c (C (=O) C) c (C) c (C (OCC) =O) c1NC (=O) \C=C\c1cn (nc1) C  
 Clc1cccc (F) c1Cn1nc (N) cc1  
 Fc1c (Cn2nc (C) c (NC (=O) c3c (nn (c3C) -c3ccccc3) -c3ccccc3) c2C) c (F) c (F) c (F) c1F  
 Clc1ccc (S (=O) (=O) N (Cc2cn (nc2C) C) C) cc1  
 Brclcccc1OCc1cc (ccc1OC) C (=O) Nc1nn (cc1) C12CC3CC (Cl) CC (C2) C3  
 O (C) c1cc (NC (=O) Cn2nnnc2) cc (-n2nnnc2) c1  
 Brclc (n (nc1C) C) C (=O) NC1C2SCC (COC (=O) C) =C (N2C1=O) C (=O) [O-]  
 Clc1cc (Cl) ccc1C (=O) \C=C\c1cn (nc1C) C  
 O (Cn1nc (cc1) C (=O) [O-]) c1ccc (OC) cc1  
 S (=O) (=O) (N (Cc1nn (cc1) CC) C) c1enn (CC) c1C  
 [S-] C1=NC (=O) c2c (nc (cc2C (F) (F) F) C2CC2) N1c1cccc1OCC  
 [S-] C1=NC (=O) c2c (nc (cc2C (F) (F) F) CC) N1c1cc (ccc1) C  
 Fc1c (NC (=O) c2n (nc (c2) C (=O) N (CC) CC) C) c (F) c (F) c (F) c1F  
 s1c2CC (CCc2c (C (OCC) =O) c1NC (=O) c1c2n (nc1) C (CC=N2) c1occc1) CC  
 S (C) c1 [nH] nc (n1) N1Cc2c (c (OC) c (OC) cc2) C1=O  
 O (C (=O) C=1n2nc (cc2N=C (C=1) c1nn (cc1) CC) -c1cccc1) C  
 FC (F) (F) Cl (O) N (N=C (Cl) C) C (=O) C (n1nc (cc1) C) C  
 Clc1cccc (NC (=O) c2nn (cc2) COc2cc (Cl) ccc2) c1C  
 Brclc (n (nc1C (F) (F) F) C (C (=O) Nc1enn (C) c1C (=O) Nc1enn (C) c1C) C) C  
 Brclcn (nc1 [N+] (=O) [O-]) Cc1cc (ccc1) C (=O) N1CC2 [NH+] (CCC2) CC1  
 S (=O) (=O) (N1CC (CCC1) C (=O) Nc1cn (nc1) Cc1ccc (F) cc1) C  
 Clc1cnn (CC) c1CN (C (=O) c1n (ncc1) COc1ccc (Cl) cc1) C  
 Clc1ccc (cc1) C (=O) \C=C\Nc1sc (n1) -c1ccc (OC (F) F) cc1  
 S=C (Nc1cnn (CC) c1C) [N-] NC (=O) CC12CC3 (CC (Cl) CC (C3) C2) c1c (noc1C) C  
 Clc1ccc (cc1) Cn1ncc (NC (=S) N2CCCC2) c1

S(=O)(=O)(Nc1nn(cc1)Cc1cccc1C)c1cn(nc1)C  
Sc1nnc(n1\N=C\c1cc(OC)c(OCn2ncc([N+](=O)[O-])c2)cc1)C(F)(F)F  
O=C(NCCc1nccc1C)CCn1ncc([N+](=O)[O-])c1C  
Brc1ccc(nc1)NC(=O)c1nn(cc1C(=O)[O-])C  
s1c(ccc1C)-c1nc2N(c3cc(ccc3)C)C([S-])=NC(=O)c2c(c1)C(F)F  
O(C(=O)c1ccc(NC(=O)c2n(ncc2C(=O)[O-])C)cc1)CC  
Clc1cccc1NC(=O)c1nn(cc1)CC(=O)Nc1cccc1C1  
o1nc(-c2cn(nc2C)C)c(C)c1-c1cn(nc1C)C  
Ic1cn(nc1C(=O)Nc1cc(OC)ccc1)C  
Sc1nnc(n1C1CC1)COc1ccc(OC)cc1  
Clc1cccc1OCc1oc(cc1)C(=O)NCc1cc(C1)c(C1)cc1  
O=C1N(c2cccc2C)C(=O)C2N=NN(C12)CC(=O)Nc1ccc(cc1)C(OCC)=O  
o1c2c(cc1-c1nn(cc1C[NH+](CCn1cnc1)C)Cc1cccc1)cccc2  
S(=O)(=O)(NCC=C)c1ccc(NC(=O)Cc2c3c(ccc2)cccc3)cc1  
O(CC(=O)Nc1cccc1C)c1ccc(cc1OC)C#N  
S1(=O)(=O)N(c2c3c(ccc2)cccc13)CCCC#N  
Brc1ccc(S(=O)(=O)Nc2cc(F)cc(F)c2)cc1  
Clc1ccc(N2C(=O)C(NNC(=O)c3ncccc3)CC2=O)cc1  
FC(F)(F)c1cc(Oc2ccc(cc2OC)CO)c([N+](=O)[O-])cc1  
O=C1N(Cc2ccccc2)C(=O)N(CCOC)C12CC[NH+](CC2)Cc1cccc1  
O1C(CN(CC1C)C(=O)c1ccc(OCc2ccccc2)cc1)C  
s1cc(nc1N(Cc1cccc1)C)-c1cccc1O  
Clc1cc(ccc1OC)C(=O)Nc1cccc1OC  
O(C(=O)C)c1cccc1C(=O)N(C(C)C)C(C)C  
s1cccc1C(=O)NCCOc1cc(ccc1)C  
Clc1cc(S(=O)(=O)N2CC(CCC2)C(=O)NCCO)c(OC)cc1  
O(CC=C)c1ccc(cc1OC)C[NH2+]CCOC  
O(CCC[NH+])1CCC(CC1)C(OCC)=O)c1cc2CCCC2cc1  
O(CC)c1c(cccc1OC)C[NH2+]C(C)c1cccc1  
Clc1cc(S(=O)(=O)N(CC(=O)N2CC[NH+](CC2)C)C)ccc1OCC  
O=C(Nc1cccc(C)c1C)C[NH+])1CC[NH+](CC1)C  
Clc1cc(NC(=O)CSc2nnc(n2CC)-c2ccncc2)ccc1OC  
O=C1N(C)C(=O)N=C2N(N=C(N=C12)c1ccc(cc1)CC)CC  
S(CC(=O)Nc1cc2OCCOc2cc1)c1nnc(n1CC=C)-c1ccncc1  
Clc1ccc(cc1)-c1oc(C)c(c1)C(=O)N1CCOCC1  
o1nc(nc1CN(CC)C(=O)NCC)-c1cccc1  
S(=O)(=O)(N1CCOCC1)c1cc(C)c(OCC(=O)N)cc1  
S(=O)(=O)(N(Cc1cccc1)C)c1ccc(NC(=O)c2ccncc2)cc1  
Clc1ccc(S(=O)(=O)N2CCCC2(=O)N(C)C)cc1  
FC(F)Oc1cccc1NC(=O)c1ccc(OC)cc1OC  
O(C)c1ccc(N2CC(Cc2=O)C(=O)Nc2cc(ccc2C)C)cc1  
S(=O)(=O)(N(C)c1ccc(cc1)C(=O)NC1CCCC1)CC  
S(=O)(=O)(N1CCCCC1)c1cc(ccc1C)C(=O)N1CC[NH+](CC1)C  
O(C)c1c(OC)cc(cc1OC)C(=O)Nc1ccc(cc1)Cc1ncccc1  
o1nc(NC(=O)Cc2ccccc2C)cc1  
Clc1cc(F)ccc1C[NH+])1CCN(S(=O)(=O)c2cn(nc2C)C)CC1  
S(=O)(=O)(N1CC[NH+](CC1)CC(=O)Nc1cccc1CC)c1ccc(F)cc1  
Clc1cc(F)c(NS(=O)(=O)c2cn(nc2)CC)cc1  
S(=O)(=O)(N(C)C)c1ccc(NC(=O)Cc2ccccc2OC)cc1  
O=C(Nc1ncc(cc1)C)C1CCN(CC1)C(=O)C  
O(C)c1cc(N2CC[NH+](CC2)CC(=O)Nc2c(cccc2CC)CC)ccc1  
Fc1ccc(N2CCN(CC2)C(=O)NCCCC)cc1  
S1c2n(N=C1c1sccc1)c(nn2)COc1ccc(F)cc1  
S(CC(=O)Nc1ncccc1)c1nnc(n1C)-c1cccc1OC  
s1c(nnc1NC(=O)C1CC(=O)N(C1)c1cc(C)c(cc1)C)C(F)(F)F  
S(CC(=O)Nc1ccc(N2CCN(S(=O)(=O)C)CC2)cc1)c1nccn1C  
O(CCOC)c1ccc(cc1)C(=O)N(C)c1cccc1  
o1nc(nc1CN(C(C)C)C(=O)NCC)-c1ccc(OC)cc1  
Brc1ccc(NC(=O)CC2Nc3c(OC2=O)cccc3)cc1  
O1c2c(CC1C)cc(cc2)C(=O)Nc1ccc(cc1C)C  
O(CC(O)C[NH+])1CC(CC(C1)C)C)C1CCCCC1  
Clc1cc(ccc1C1)C(=O)Nc1cc(OC)ccc1N1CCOCC1  
O=C1N(CCOC)C(=O)N(c2nc3n(c12)C=C(N3c1cc(ccc1)C)C)C  
Clc1c2c(sc1C(=O)N1CCN(CC1)c1ncccc1)cc(F)cc2  
Fc1cc(ccc1)C(=O)NCC[NH+])1CCCCC1  
O1CCC([NH+])2CCC(CC2)C(=O)Nc2ccc(-n3nnnc3)cc2)CC1  
S(=O)(=O)(NCCc1cccc1)c1ccc(NC(=O)C2OCCC2)cc1  
s1cccc1C(=O)NC1CC[NH+](CC1)C(C)C  
s1c(C(=O)N(C)C)c(nc1NC(=O)CC12CC3CC(C1)CC(C2)C3)C  
O(C)c1cccc1C(=O)Nc1cccc1C(C)C  
Clc1cc(ccc1)C[NH+])1C[C@H]([NH2+])Cc2ccc(OC)c(C)c2C)C[C@H]1C(=O)NCCc1cccc1F

Clc1cccc1CC(=O)NCc1cc(C1)ccc1  
 O1c2cc(ccc2OC1)C[NH+]1CCN(CC1)C(=O)CCNC(=O)c1cccc1  
 O=C1N(C)C(=O)N(c2nc3n(c12)C(C)C(=NN3Cc1cccc1)C)C  
 O(CCN1c2c(nc1CCO)cccc2)c1ccc(cc1)C  
 Clc1cc(C)c(NC(=O)C[NH+]2CCC(CC2)C)cc1  
 Clc1ccc(cc1)-c1oc(cc1)C(=O)Nc1nn(nn1)C  
 O1CC[NH+](CC1)C\C=C\COC1cccc1C  
 s1cc(nc1-c1ccc(cc1)C)Cn1c2c(nc1C#N)cccc2  
 s1cc(cc1)C(=O)Nc1cc(OC)c(OC)cc1  
 Clc1cccc(F)c1C[NH+]1CC([NH+](CC1)CCC(C)C)CCO  
 s1ccnc1NC(=O)C(Sc1nnc(n1CC)-c1ccc(OC)cc1)C  
 O=C1N2C(=Nc3n(CCCOC)c(cc13)C(=O)NCCCO)C=CC=C2  
 S(C(C)C)c1cccc1C(=O)Nc1cc2OCCOc2cc1  
 O(C\C=C\Cn1ccnc1)c1ccc(cc1)C(C)C  
 [NH2+]1CC(CCC1)c1[nH]c2c(n1)cccc2  
 o1c(ccc1COC)C(=O)Nc1cc([nH+]c2c1cccc2OC)C  
 Clc1cc(-n2nnc(C(=O)NCc3cccc3)c2N)ccc1  
 [NH+]1(CCN(CC1)C=1n2nc3nc(cc(c3c2N=C(C=1)C)C)C)CC(C)=C  
 Clc1cc2c(oc(C(OCC)=O)c2C[NH+]2CC[NH+](CC2)C)cc1  
 S(=O)(=O)(N(C)C)N1CCC(CC1)C(=O)N1CCN(CC1)c1cccc(C)c1C  
 O(CC)c1cccc1C(=O)Nc1ccc(cc1)C(=O)NCCC  
 Clc1ccc(SCC(=O)NCC[NH+](C)C)cc1  
 S(=O)(=O)(Nc1ccc(cc1)C(=O)NCCC[NH+]1CCCCC1)CC  
 O=C(Nc1ccc(cc1)C)c1nnn(c1N)-c1cccc1  
 O=C(NCC[NH+]1CCCCC1)c1n(c2c(cc(cc2)CC)c1C)C  
 Fc1ccc(cc1)-c1nn(cc1C[NH+]1CCC(CC1)CN1CCCC1=O)-c1ccc(cc1)C  
 O=C(NCC(C)=C)C1CC[NH+](CC1)C1CC[NH+](CC1)Cc1cccc1C  
 Fc1cc(ccc1F)CNC(=O)c1nnn(c1)C1CCCC1  
 S(CCCNC(=O)c1noc(c1)COc1c(F)cccc1F)C  
 O(C)c1cc(ccc1OC)CNC(=O)c1cc(cc(-n2nnnc2)c1)-c1cc(ccc1)C  
 O(C)c1cc(ccc1OC)C(=O)C1CCC[NH+](C1)Cc1cnc(nc1)N  
 Clc1cc(F)ccc1C[NH+]1CCNC(=O)C1CC(=O)N1CCOCC1  
 s1ccc(C)c1C(=O)NCc1nnc(SCC2OCCC2)n1-c1cc(ccc1)C(F)(F)F  
 O(C)c1c(ccc1OC)C[NH+]1CC([NH+](CC1)Cc1cccc1C)CCO  
 o1nc(c2c1CCN(C2)C(=O)CCOC)-c1ccc(cc1)-c1cccc1  
 Clc1cc(ccc1)C(=O)N(CCOC1ccc(cc1)C[NH+](Cc1nc(sc1)C)C)C  
 s1c(C)c(nc1CCNC(=O)C1OCCC1)C  
 s1cc(cc1C(=O)C)C(=O)N1CC[C@@H]2N(CCC[C@@H]2C1)C(=O)c1cc2nccnc2cc1  
 Fc1c(cccc1F)CN1CCCC(O)C[NH2+]Cc2ncccc2)C1=O  
 s1c2CC([NH2+]Cc3cccnc3)CCc2c2c1N=CN(Cc1ccc(F)cc1)C2=O
